# Supplementary material for: Modeling Sleep Genetics Uncovers Distinct Disease Risks in Night vs. Day Workers
Source: Research Square preprint supplement (doi:10.21203/rs.3.rs-7528705/v1), 2025-09-08
Supplement: Supplementary file 1 [file 9ffcb1fc74e6d33fcb8b08cd.xlsx]

## Sheet: overview
ID	description	Table Legends
Supplementary Table 1	Summary statistics used for LD-score regression including sleep traits used for structural equation modelling	DOI is the link to the related publication; descr gives a short description of the trait coding strategy, if applicable; N is the number of samples reported in the study; coding gives more detailed information on the coding strategy used in the study
Supplementary Table 2	Result of LD score regression	rg is the genetic correlation; se is the standard error; z is the Z-statistic; P is the p-value
Supplementary Table 3	Exploratory Factor analysis	Shows how each genetic trait loads onto each factor; models with different numbers of factors were tested; GSL represents the individual factors; numbers in the matrix are standardized loadings of the traits on the factors
Supplementary Table 4	5 Factor model confirmatory analysis	Unstand_Est is the unstandardized estimate of the effect of the summary statistic on the latent factor; Unstand_SE is its standard error; STD_Genotype is the effect per standard deviation increase in genotype; STD_Genotype_SE is the corresponding standard error; STD_ALL is the fully standardized effect size; STD_ALL_SE is its standard error
Supplementary Table 5	7 Factor model confirmatory analysis	Unstand_Est is the unstandardized estimate of the effect of the summary statistic on the latent factor; Unstand_SE is its standard error; STD_Genotype is the effect per standard deviation increase in genotype; STD_Genotype_SE is the corresponding standard error; STD_ALL is the fully standardized effect size; STD_ALL_SE is its standard error
Supplementary Table 6	Factor model comparison	chisq is the chi-square statistic for model fit; df is degrees of freedom; AIC is Akaike Information Criterion (lower is better); CFI is the Comparative Fit Index (values >0.95 are considered good); SRMR is the Standardized Root Mean Square Residual (lower is better)
Supplementary Table 7	Factor 1 sentinel SNPs	refA is the effect allele; freq is the allele frequency of the effect allele; b is the raw effect size (beta) from the GWAS; se is the standard error; n is estimated sample size; freq_geno is the reference allele frequency; bJ is the joint conditional effect size after adjusting for other SNPs in the region (GCTA_COJO); bJ_se is the corresponding standard error; pJ is the corresponding p-value; L…
Supplementary Table 8	Factor 2 sentinel SNPs	refA is the effect allele; freq is the allele frequency of the effect allele; b is the raw effect size (beta) from the GWAS; se is the standard error; n is estimated sample size; freq_geno is the reference allele frequency; bJ is the joint conditional effect size after adjusting for other SNPs in the region (GCTA_COJO); bJ_se is the corresponding standard error; pJ is the corresponding p-value; L…
Supplementary Table 9	Factor 3 sentinel SNPs	refA is the effect allele; freq is the allele frequency of the effect allele; b is the raw effect size (beta) from the GWAS; se is the standard error; n is estimated sample size; freq_geno is the reference allele frequency; bJ is the joint conditional effect size after adjusting for other SNPs in the region (GCTA_COJO); bJ_se is the corresponding standard error; pJ is the corresponding p-value; L…
Supplementary Table 10	Factor 4 sentinel SNPs	refA is the effect allele; freq is the allele frequency of the effect allele; b is the raw effect size (beta) from the GWAS; se is the standard error; n is estimated sample size; freq_geno is the reference allele frequency; bJ is the joint conditional effect size after adjusting for other SNPs in the region (GCTA_COJO); bJ_se is the corresponding standard error; pJ is the corresponding p-value; L…
Supplementary Table 11	Factor 5 sentinel SNPs	refA is the effect allele; freq is the allele frequency of the effect allele; b is the raw effect size (beta) from the GWAS; se is the standard error; n is estimated sample size; freq_geno is the reference allele frequency; bJ is the joint conditional effect size after adjusting for other SNPs in the region (GCTA_COJO); bJ_se is the corresponding standard error; pJ is the corresponding p-value; L…
Supplementary Table 12	Factor 6 sentinel SNPs	refA is the effect allele; freq is the allele frequency of the effect allele; b is the raw effect size (beta) from the GWAS; se is the standard error; n is estimated sample size; freq_geno is the reference allele frequency; bJ is the joint conditional effect size after adjusting for other SNPs in the region (GCTA_COJO); bJ_se is the corresponding standard error; pJ is the corresponding p-value; L…
Supplementary Table 13	Overlap of sentinel SNPs between factors	input refers to the source SNP list; each following column indicates overlap of sentinel SNPs across factors; cells contain rsID if overlap is present
Supplementary Table 14	FUMA result: tissue overlap	for each factor beta, standard error and p-value of enrichment is given
Supplementary Table 15	FUMA result: pathway overlap including overlap to GWAS catalogue	for each factor beta, standard error and p-value of enrichment is given
Supplementary Table 16	Summary statistic used for Mendelian Ranodomization and LD score regression	Publication gives the pubmed ID of the related publication; independent loci gives the reported number of loci; downloaded from gives a link to the resource where the data were downloaded; N is reported sample size
Supplementary Table 17	Result of factor LD score regression	rg is the genetic correlation; se is the standard error; z is the Z-statistic; P is the p-value
Supplementary Table 18	Mendelian Randomisation: Harmonization	total SNPs is the number of exposure SNPs; matched is the number of SNPs directly matched; number proxy indicates the use of SNPs from the same LD block; initial columns give counts; these column names then repeat to list the actual rsIDs of the SNPs included in or excluded from the harmonisation process
Supplementary Table 19	Mendelian Randomisation: MR presso results	table gives the raw and outlier corrected MR estimates including number of outliers and Presso global P-value; Presso_global is the global P-value for horizontal pleiotropy; Presso_distortion compares raw and corrected estimates to test impact of outliers
Supplementary Table 20	Mendelian Randomisation: Heterogeneity & Steiger Test Results	het_Q is Cochran's Q statistic; het_Q_df is degrees of freedom; het_Q_pval is the p-value; plt_Egger_intercept is MR-Egger y-intercept; plt_Egger_se is its standard error; plt_Egger_inter_Pval is its p-value; steiger_exposure_R2 and steiger_outcome_R2 are R² for exposure and outcome; steiger_causal_direction indicates direction; steiger_pval tests significance
Supplementary Table 21	Mendelian Randomisation: result incl. sensitivity analysis	for each factor and trait, includes number of exposure SNPs; beta, SE, P, confidence intervals, and odds ratios; methods include IVW, Simple median, Weighted median, Weighted mode, IVW radial, MR Egger, and RAPS
Supplementary Table 22	Sample split of UK Biobank samples for PheWAS	split of the UK Biobank sample used for PheWAS analyses
Supplementary Table 23	UK biobank: DeepPheWAS phenotype summary	DeepPheWAS ID and description from the DeepPheWAS R package; counts from UK Biobank sample without overlap with factor GWAS (Table 22)
Supplementary Table 24	PheWAS result: sleep factor 2	Estimate is logOdds from logistic regression or beta from linear regression; SE is standard error; Z or t-value; OR is odds ratio; CI_up and CI_low are 95% confidence intervals; ncase is number of cases
Supplementary Table 25	PheWAS result: sleep factor 4	Estimate is logOdds from logistic regression or beta from linear regression; SE is standard error; Z or t-value; OR is odds ratio; CI_up and CI_low are 95% confidence intervals; ncase is number of cases
Supplementary Table 26	All of Us Harmonisation: Mapping	The two tables summarize the process of mapping cancer and non-cancer survey data between the UK Biobank and All of Us cohorts.
Supplementary Table 27	All of Us: DeepPheWAS phenotype summary	DeepPheWAS ID and description from the DeepPheWAS R package; counts from the EUR, genetic data QCed All of Us samples (N=131,729 )
Supplementary Table 28	REPLICATION PheWAS result: sleep factor 2	Estimate is logOdds from logistic regression or beta from linear regression; SE is standard error; Z or t-value; OR is odds ratio; CI_up and CI_low are 95% confidence intervals; ncase is number of cases
Supplementary Table 29	REPLICATION PheWAS result: sleep factor 4	Estimate is logOdds from logistic regression or beta from linear regression; SE is standard error; Z or t-value; OR is odds ratio; CI_up and CI_low are 95% confidence intervals; ncase is number of cases
Supplementary Table 30	Nightshift Interaction analysis: sleep factor 2	type reflects whether a sensitivity analysis was performed; set gives the sample group (day workers, ever night shift, some night shift, or always/usually night shift); Estimate, Std.error, and odds ratio follow the same format as PheWAS tables
Supplementary Table 31	Nightshift Interaction analysis: sleep factor 4	type reflects whether a sensitivity analysis was performed; set gives the sample group (day workers, ever night shift, some night shift, or always/usually night shift); Estimate, Std.error, and odds ratio follow the same format as PheWAS tables
Supplementary Table 32	Score Quartiles: Phenotype summary table stratified by day and night shift workers	Information on number (N) and percent (pct) of females, cases, and controls is provided for each outcome
Supplementary Table 33	Score Quartiles: F2 quartiles result	for selected traits (from Figure 5A), data are stratified by day/night shift and polygenic risk score quartiles; strata column: 1_day is lowest quartile in day workers, up to 4_ever for highest in night shift workers; regression results include odds ratio and 95% CI; ratio column gives case/control ratio
Supplementary Table 34	Score Quartiles: F4 quartiles result	for selected traits (from Figure 5A), data are stratified by day/night shift and polygenic risk score quartiles; strata column: 1_day is lowest quartile in day workers, up to 4_ever for highest in night shift workers; regression results include odds ratio and 95% CI; ratio column gives case/control ratio
Supplementary Table 35	Score Quartiles stratified for obese participants: F2* quartiles result	for selected traits (from Figure 5A), data are stratified by day/night shift and polygenic risk score quartiles; strata column: 1_day is lowest quartile in day workers, up to 4_ever for highest in night shift workers; regression results include odds ratio and 95% CI; ratio column gives case/control ratio

## Sheet: Supplementary Table 1
trait_ID	DOI	descr	approx. N	coding
ACC_DIURNAL_INACT_RAW	doi.org/10.1038/s41467-019-09576-1	Mean diurnal (non-SPT (sleep period time) window) inactivity duration	84757	continous (inverse-normal-scale transformation)
ACC_L5_TIME_RAW	doi.org/10.1038/s41467-019-09576-1	Mean L5 time in hours after previous midnight	85205	continous (inverse-normal-scale transformation)
ACC_M10_TIME_RAW	doi.org/10.1038/s41467-019-09576-1	Mean M10 time in hours after previous midnight	85670	continous (inverse-normal-scale transformation)
ACC_N_SLEEP_EPISODES_RAW	doi.org/10.1038/s41467-019-09576-1	Mean number of sleep episodes within the SPT-window, adjusted for mean SPT	84810	continous (inverse-normal-scale transformation)
ACC_SLEEP_DUR_RAW	doi.org/10.1038/s41467-019-09576-1	Mean duration of sleep within the SPT-window	85449	continous (inverse-normal-scale transformation)
ACC_SLEEP_DUR_SD_RAW	doi.org/10.1038/s41467-019-09576-1	Standard deviation of sleep duration across all SPT-windows	84441	continous (inverse-normal-scale transformation)
ACC_SLEEP_EFF_RAW	doi.org/10.1038/s41467-019-09576-1	Mean Sleep efficiency, calculated as proportion of SPT-window classified as sleep	84810	continous (inverse-normal-scale transformation)
ACC_SLEEP_MIDP_RAW	doi.org/10.1038/s41467-019-09576-1	Mean time of SPT-window midpoint in hours after previous midnight	84810	continous (inverse-normal-scale transformation)
SR_DaytimeNapping	10.1038/s41467-020-20585-3	daytime napping frequency	452071	continuous (“never/rarely”, “sometimes”, or “usually”)
SR_DaytimeSleepiness_adjBMI	10.1038/s41467-019-11456-7	self-reported daytime sleepiness of four categories as a continuous varable	452071	continuous (as 1 to 4)
SR_DaytimeSleepiness	10.1038/s41467-019-11456-7	self-reported daytime sleepiness of four categories as a continuous varable	452071	continuous (as 1 to 4)
SR_Insomnia	10.1038/s41588-018-0333-3	insomnia extreme symptoms vs controls	452071	binary (no numbers given)
SR_LongSleep	10.1038/s41467-019-08917-4	snp on long sleep duration vs controls	446118	binary (no numbers given)
SR_ShortSleep	10.1038/s41467-019-08917-4	snp on short sleep duration vs controls	446118	binary (no numbers given)
SR_SleepDuration	10.1038/s41467-019-08917-4	the association between SNP and sleep duration in hours	446118	continous (in hours)
SR_chronotype	doi.org/10.1038/s41467-018-08259-7	chronotype -2 to 2	697828	continuous (as -2 to +2)
SR_morning_person	doi.org/10.1038/s41467-018-08259-7	Morining person as case control	697828	binary (cases; N = 120,478; controls; N = 127,622)
SnoringBMIadj	doi.org/10.1038/s41467-020-14625-1	Snoring-adjusted by BMI	408000	binary (contr: 408,000; snorers ~ 152,000)
relativeAmplitude	doi.org/10.1016/j.ebiom.2018.08.004	low relative amplitude (RA), an objective measure of rest-activity cycles derived from the accelerometer data RA is (M10 -L5)/(M10+L5)	71500	continous (from 0 to 1)
average_spo2	doi.org/10.1371/journal.pgen.1007739	average oxyhemoglobin saturation during sleep	22700	continous
minimum_spo2	doi.org/10.1371/journal.pgen.1007739	minimum oxyhemoglobin saturation during sleep	22700	continous
Per90	doi.org/10.1371/journal.pgen.1007739	percent of sleep with oxyhemoglobin saturation under 90%	22700	continous
sleep_apnea	doi.org/10.1165/rcmb.2017-0237oc	Obstructive sleep apnea	19733	continous (apnea–hypopnea index )
VitD_publ	doi.org/10.1038/s41467-020-15421-7	25 hydroxyvitamin D (25OHD) concentration	417580
SAD	doi.org/10.1038/s41398-018-0246-z	seasonal affective disorder (SAD)	5200
caffeine	this study - Ukbiobank	caffeine intake	287813
caffeine_intake	this study - Ukbiobank	regular-type coffee consumed per day among coffein consumers	231371
CigDay	doi.org/10.1038%2Fs41588-018-0307-5	cigarettes per day	1200000
Drnk_Wk	doi.org/10.1038%2Fs41588-018-0307-5	drinks per week	1200000
PA_overall	doi.org/10.1038/s41467-018-07743-4	Physical activity (overall physical activity time)	91105
PA_moderate	doi.org/10.1038/s41467-018-07743-4	Physical activity (moderate intensity activity duration)	91105
PA_walking	doi.org/10.1038/s41467-018-07743-4	Physical activity (walking duration)	91105
PA_sedentary	doi.org/10.1038/s41467-018-07743-4	Sedentary behaviour duration	91105
SWB	doi.org/10.1038/ng.3552	subjective well-being	298420
mood_swings	doi.org/10.1038/s41467-018-03242-8	Experiencing mood swings	489212
publ_anxiety	doi.org/10.1038/s41588-018-0151-7	Anxiety_Tension_Special_Factor	372903
neurotisicm_publ	oi.org/10.1038/s41380-019-0387-3	neuroticism	449484
MDD	doi.org/10.1038/s41467-018-03819-3	major depression disorder	322580
ADHD	doi.org/10.1016/j.biopsych.2017.11.026	Attention-deficit hyperactivity disorder (ADHD)	53000
out_biPol	doi.org/10.1093/hmg/ddw181	Bipolar disorder (BD)	40000
out_SCZ	doi.org/10.1038/s41586-022-04434-5	Schizophrenia	320000
out_Anorexia	doi.org/10.1038/s41588-019-0439-2	Anorexia Nervosa	72000
out_PTST	doi.org/10.1038/s41467-019-12576-w	risk of posttraumatic stress disorder	200000
out_BMI	doi.org/10.1038/nature14177	body mass index (BMI)	339224
out_WHRadjBMI	doi.org/10.1038/nature14132	waist-to-hip ratio adjusted for body mass index (BMI)	224459
out_T2D	doi:10.1101/2023.03.31.23287839	type 2 diabetes (T2D)	210000
out_CAD	doi.org/10.1038/ng.3396	coronary artery disease (CAD)	185000
out_MI	doi.org/10.1093/eurheartj/ehaa1040	susceptibility for myocardial infarction	630000
out_DBP	doi.org/10.1038/s41588-018-0205-x	diastolic blood pressure (DBP)	1000000
out_SBP	doi.org/10.1038/s41588-018-0205-x	systolic blood pressure (SBP)	1000000
out_PP	doi.org/10.1038/s41588-018-0205-x	pulse pressure (PP)	1000000
out_eGFR	doi.org/10.1038/s41467-021-24491-0	creatinine-based estimated glomerular filtration rate (eGFR)	1201909
out_CRP	doi.org/10.1038/s41467-022-29650-5	C-reactive protein (CRP)	990000
out_LDL	doi.org/10.1038/s41586-021-04064-3	low-density lipoprotein cholesterol (LDL-C)	1650000
out_HDL	doi.org/10.1038/s41586-021-04064-3	high-density lipoprotein cholesterol (HDL-C)	1650000
out_TG	doi.org/10.1038/s41586-021-04064-3	triglycerides (TGs)	1650000
out_nonHDL	doi.org/10.1038/s41586-021-04064-3	non-high-density lipoprotein cholesterol (nonHDL-C)	1650000
out_2hGLUC	doi.org/10.1038/s41588-021-00852-9	2-h glucose after an oral glucose challenge	281416
out_HbA1c	doi.org/10.1038/s41588-021-00852-9	glycated hemoglobin	281416
out_FG	doi.org/10.1038/s41588-021-00852-9	fasting glucose	281416
out_FI	doi.org/10.1038/s41588-021-00852-9	fasting insulin	281416

## Sheet: Supplementary Table 2
trait 1	trait2	rg	se	z	p
ACC_DIURNAL_INACT	MDD	0.247	0.0566	4.3674	1.26E-05
ACC_DIURNAL_INACT	SAD	-0.0186	0.0455	-0.4095	6.82E-01
ACC_DIURNAL_INACT	SWB	-0.2494	0.0458	-5.4434	5.23E-08
ACC_DIURNAL_INACT	ADHD	0.1125	0.0509	2.211	2.70E-02
ACC_DIURNAL_INACT	Per90	0.0922	0.1105	0.8339	4.04E-01
ACC_DIURNAL_INACT	CigDay	-0.1742	0.0315	-5.5324	3.16E-08
ACC_DIURNAL_INACT	FG	-0.0379	0.0362	-1.0479	2.95E-01
ACC_DIURNAL_INACT	FI	0.1297	0.0444	2.9243	3.45E-03
ACC_DIURNAL_INACT	MI	0.1547	0.034	4.5432	5.54E-06
ACC_DIURNAL_INACT	PP	0.0604	0.0262	2.308	2.10E-02
ACC_DIURNAL_INACT	TG	0.1584	0.0263	6.0131	1.82E-09
ACC_DIURNAL_INACT	Drnk_Wk	0.1195	0.0307	3.894	9.86E-05
ACC_DIURNAL_INACT	caffein	0.009	0.0595	0.1508	8.80E-01
ACC_DIURNAL_INACT	BMI	0.1538	0.0279	5.5202	3.39E-08
ACC_DIURNAL_INACT	CAD	0.1172	0.0383	3.0616	2.20E-03
ACC_DIURNAL_INACT	CRP	0.1986	0.032	6.2154	5.12E-10
ACC_DIURNAL_INACT	DBP	0.1023	0.0257	3.9757	7.02E-05
ACC_DIURNAL_INACT	HDL	-0.1734	0.0247	-7.0076	2.42E-12
ACC_DIURNAL_INACT	LDL	0.0359	0.0263	1.3659	1.72E-01
ACC_DIURNAL_INACT	SBP	0.0938	0.0258	3.6307	2.83E-04
ACC_DIURNAL_INACT	SCZ	0.0604	0.0309	1.9569	5.04E-02
ACC_DIURNAL_INACT	T2D	0.1887	0.023	8.1872	2.67E-16
ACC_DIURNAL_INACT	PTST	0.2195	0.0663	3.3095	9.35E-04
ACC_DIURNAL_INACT	eGFR	-0.0813	0.0267	-3.0411	2.36E-03
ACC_DIURNAL_INACT	VitD	-0.1788	0.0305	-5.8651	4.49E-09
ACC_DIURNAL_INACT	HbA1c	-0.0149	0.0358	-0.4172	6.77E-01
ACC_DIURNAL_INACT	biPol	-0.0573	0.0498	-1.1497	2.50E-01
ACC_DIURNAL_INACT	PA_overall	-0.6002	0.0319	-18.8109	6.15E-79
ACC_DIURNAL_INACT	PA_walking	-0.4801	0.0464	-10.3371	4.79E-25
ACC_DIURNAL_INACT	2hGLUC	0.0728	0.0607	1.1994	2.30E-01
ACC_DIURNAL_INACT	nonHDL	0.0586	0.0252	2.329	1.99E-02
ACC_DIURNAL_INACT	PA_moderate	-0.5251	0.0571	-9.1917	3.87E-20
ACC_DIURNAL_INACT	SR_Insomnia	0.1449	0.032	4.5267	5.99E-06
ACC_DIURNAL_INACT	mood_swings	0.2285	0.0307	7.4469	9.55E-14
ACC_DIURNAL_INACT	sleep_apnea	0.0402	0.1696	0.2371	8.13E-01
ACC_DIURNAL_INACT	PA_sedentary	0.1062	0.0456	2.3282	1.99E-02
ACC_DIURNAL_INACT	SR_LongSleep	0.2949	0.0421	7.0029	2.51E-12
ACC_DIURNAL_INACT	anxiety	-0.228	0.0411	-5.5425	2.98E-08
ACC_DIURNAL_INACT	average_spo2	-0.0896	0.0918	-0.9758	3.29E-01
ACC_DIURNAL_INACT	minimum_spo2	-0.0673	0.0935	-0.7199	4.72E-01
ACC_DIURNAL_INACT	Anorexia	-0.0532	0.0403	-1.3212	1.86E-01
ACC_DIURNAL_INACT	SR_ShortSleep	0.043	0.0375	1.1468	2.51E-01
ACC_DIURNAL_INACT	SR_chronotype	-0.0438	0.0298	-1.4683	1.42E-01
ACC_DIURNAL_INACT	SnoringBMIadj	-0.0557	0.0356	-1.5636	1.18E-01
ACC_DIURNAL_INACT	WHRadjBMI	-0.0074	0.0375	-0.1981	8.43E-01
ACC_DIURNAL_INACT	caffein_intake	-0.0467	0.0452	-1.0329	3.02E-01
ACC_DIURNAL_INACT	SR_SleepDuration	0.1021	0.0333	3.064	2.18E-03
ACC_DIURNAL_INACT	neurotisicm	0.1138	0.0286	3.9711	7.15E-05
ACC_DIURNAL_INACT	SR_DaytimeNapping	0.3522	0.0281	12.5219	5.67E-36
ACC_DIURNAL_INACT	SR_morning_person	-0.0541	0.0301	-1.7957	7.25E-02
ACC_DIURNAL_INACT	relativeAmplitude	0.3467	0.2188	1.5846	1.13E-01
ACC_DIURNAL_INACT	ACC_L5_TIME	0.0335	0.0508	0.6593	5.10E-01
ACC_DIURNAL_INACT	ACC_M10_TIME	0.0361	0.0561	0.6437	5.20E-01
ACC_DIURNAL_INACT	SR_DaytimeSleepiness	0.2441	0.0308	7.9177	2.42E-15
ACC_DIURNAL_INACT	ACC_SLEEP_DUR	0.481	0.0404	11.8927	1.29E-32
ACC_DIURNAL_INACT	ACC_SLEEP_EFF	-0.1782	0.0497	-3.5852	3.37E-04
ACC_DIURNAL_INACT	ACC_SLEEP_MIDP	-0.2166	0.0523	-4.1425	3.44E-05
ACC_DIURNAL_INACT	ACC_SLEEP_DUR_SD	0.146	0.0853	1.7126	8.68E-02
ACC_DIURNAL_INACT	SR_DaytimeSleepiness_adjBMI	0.2056	0.0311	6.6098	3.85E-11
ACC_DIURNAL_INACT	ACC_N_SLEEP_EPISODES	0.2017	0.0412	4.902	9.49E-07
ACC_L5_TIME	MDD	0.122	0.0648	1.8834	5.96E-02
ACC_L5_TIME	SAD	-0.0055	0.0531	-0.1035	9.18E-01
ACC_L5_TIME	SWB	-0.0517	0.0583	-0.8858	3.76E-01
ACC_L5_TIME	ADHD	0.0639	0.0622	1.0274	3.04E-01
ACC_L5_TIME	Per90	0.0139	0.1381	0.1008	9.20E-01
ACC_L5_TIME	CigDay	-0.0266	0.0398	-0.6681	5.04E-01
ACC_L5_TIME	FG	0.0823	0.0434	1.8986	5.76E-02
ACC_L5_TIME	FI	0.0829	0.0489	1.694	9.03E-02
ACC_L5_TIME	MI	0.0934	0.0374	2.4994	1.24E-02
ACC_L5_TIME	PP	0.0157	0.0285	0.5529	5.80E-01
ACC_L5_TIME	TG	0.0378	0.0269	1.4075	1.59E-01
ACC_L5_TIME	Drnk_Wk	-0.0458	0.0364	-1.2585	2.08E-01
ACC_L5_TIME	caffein	-0.0051	0.0651	-0.078	9.38E-01
ACC_L5_TIME	BMI	0.0304	0.0338	0.8991	3.69E-01
ACC_L5_TIME	CAD	0.1005	0.0443	2.2699	2.32E-02
ACC_L5_TIME	CRP	0.0526	0.0297	1.7694	7.68E-02
ACC_L5_TIME	DBP	0.003	0.028	0.1057	9.16E-01
ACC_L5_TIME	HDL	-0.0734	0.0263	-2.7957	5.18E-03
ACC_L5_TIME	LDL	0.0052	0.0239	0.2159	8.29E-01
ACC_L5_TIME	SBP	0.0117	0.0289	0.4056	6.85E-01
ACC_L5_TIME	SCZ	0.0641	0.0348	1.8438	6.52E-02
ACC_L5_TIME	T2D	0.0153	0.0307	0.4972	6.19E-01
ACC_L5_TIME	PTST	-0.0573	0.084	-0.6818	4.95E-01
ACC_L5_TIME	eGFR	0.0554	0.0298	1.8605	6.28E-02
ACC_L5_TIME	VitD	-0.13	0.0337	-3.8597	1.14E-04
ACC_L5_TIME	HbA1c	-0.0546	0.0461	-1.184	2.36E-01
ACC_L5_TIME	biPol	0.0334	0.0576	0.5801	5.62E-01
ACC_L5_TIME	PA_overall	-0.1459	0.0494	-2.957	3.11E-03
ACC_L5_TIME	PA_walking	-0.1228	0.0527	-2.3286	1.99E-02
ACC_L5_TIME	2hGLUC	-0.0398	0.0683	-0.5822	5.60E-01
ACC_L5_TIME	nonHDL	0.0181	0.0231	0.7834	4.33E-01
ACC_L5_TIME	PA_moderate	-0.0105	0.0727	-0.1444	8.85E-01
ACC_L5_TIME	SR_Insomnia	0.0191	0.0377	0.5051	6.13E-01
ACC_L5_TIME	mood_swings	-0.0463	0.0379	-1.2222	2.22E-01
ACC_L5_TIME	sleep_apnea	0.1029	0.1872	0.5497	5.83E-01
ACC_L5_TIME	PA_sedentary	0.1725	0.0493	3.4987	4.68E-04
ACC_L5_TIME	SR_LongSleep	0.0127	0.0499	0.2543	7.99E-01
ACC_L5_TIME	anxiety	-0.0882	0.0469	-1.8794	6.02E-02
ACC_L5_TIME	average_spo2	0.0172	0.0991	0.1738	8.62E-01
ACC_L5_TIME	minimum_spo2	-0.0798	0.1116	-0.715	4.75E-01
ACC_L5_TIME	Anorexia	-0.0561	0.0473	-1.1862	2.36E-01
ACC_L5_TIME	SR_ShortSleep	0.0214	0.0405	0.5295	5.96E-01
ACC_L5_TIME	SR_chronotype	0.9109	0.0348	26.164	6.84E-151
ACC_L5_TIME	SnoringBMIadj	-0.0027	0.0387	-0.0699	9.44E-01
ACC_L5_TIME	WHRadjBMI	0.0588	0.0464	1.2693	2.04E-01
ACC_L5_TIME	caffein_intake	-0.0228	0.044	-0.518	6.04E-01
ACC_L5_TIME	SR_SleepDuration	-0.0185	0.0361	-0.5134	6.08E-01
ACC_L5_TIME	neurotisicm	-0.0453	0.0355	-1.2755	2.02E-01
ACC_L5_TIME	SR_DaytimeNapping	-0.1313	0.0373	-3.5177	4.35E-04
ACC_L5_TIME	SR_morning_person	0.9238	0.0351	26.3243	1.01E-152
ACC_L5_TIME	relativeAmplitude	0.533	0.3043	1.7513	7.99E-02
ACC_L5_TIME	ACC_M10_TIME	0.8091	0.0377	21.4373	6.00E-102
ACC_L5_TIME	SR_DaytimeSleepiness	-0.0509	0.037	-1.3742	1.69E-01
ACC_L5_TIME	ACC_SLEEP_DUR	-0.0849	0.0477	-1.7805	7.50E-02
ACC_L5_TIME	ACC_SLEEP_EFF	-0.1827	0.054	-3.3811	7.22E-04
ACC_L5_TIME	ACC_SLEEP_MIDP	0.8857	0.0388	22.8137	3.35E-115
ACC_L5_TIME	ACC_SLEEP_DUR_SD	0.3064	0.0939	3.2635	1.10E-03
ACC_L5_TIME	ACC_DIURNAL_INACT	0.0335	0.0508	0.6593	5.10E-01
ACC_L5_TIME	SR_DaytimeSleepiness_adjBMI	-0.0539	0.0367	-1.4715	1.41E-01
ACC_L5_TIME	ACC_N_SLEEP_EPISODES	-0.0147	0.0446	-0.3307	7.41E-01
ACC_M10_TIME	MDD	0.0519	0.0773	0.672	5.02E-01
ACC_M10_TIME	SAD	0.0185	0.061	0.3027	7.62E-01
ACC_M10_TIME	SWB	-0.0365	0.0659	-0.554	5.80E-01
ACC_M10_TIME	ADHD	0.0482	0.0652	0.7404	4.59E-01
ACC_M10_TIME	Per90	-0.1577	0.1391	-1.1341	2.57E-01
ACC_M10_TIME	CigDay	0.0874	0.0445	1.9648	4.94E-02
ACC_M10_TIME	FG	-0.0391	0.044	-0.8888	3.74E-01
ACC_M10_TIME	FI	0.0032	0.0546	0.0595	9.53E-01
ACC_M10_TIME	MI	0.0101	0.0401	0.252	8.01E-01
ACC_M10_TIME	PP	-0.0675	0.0339	-1.9933	4.62E-02
ACC_M10_TIME	TG	-0.0274	0.0303	-0.9053	3.65E-01
ACC_M10_TIME	Drnk_Wk	-0.2215	0.0406	-5.459	4.79E-08
ACC_M10_TIME	caffein	-0.0923	0.0702	-1.3158	1.88E-01
ACC_M10_TIME	BMI	-0.0359	0.0371	-0.9675	3.33E-01
ACC_M10_TIME	CAD	0.0097	0.0437	0.222	8.24E-01
ACC_M10_TIME	CRP	-0.0613	0.0353	-1.7386	8.21E-02
ACC_M10_TIME	DBP	-0.0623	0.0334	-1.8653	6.21E-02
ACC_M10_TIME	HDL	0.0101	0.0271	0.373	7.09E-01
ACC_M10_TIME	LDL	0.011	0.0281	0.3896	6.97E-01
ACC_M10_TIME	SBP	-0.0809	0.0353	-2.2912	2.20E-02
ACC_M10_TIME	SCZ	0.1142	0.0322	3.5406	3.99E-04
ACC_M10_TIME	T2D	-0.1206	0.0323	-3.7276	1.93E-04
ACC_M10_TIME	PTST	0.038	0.0892	0.4264	6.70E-01
ACC_M10_TIME	eGFR	0.0327	0.0353	0.9282	3.53E-01
ACC_M10_TIME	VitD	-0.0783	0.0366	-2.1376	3.25E-02
ACC_M10_TIME	HbA1c	-0.07	0.0411	-1.7011	8.89E-02
ACC_M10_TIME	biPol	0.1407	0.0609	2.31	2.09E-02
ACC_M10_TIME	PA_overall	-0.1213	0.0528	-2.2983	2.15E-02
ACC_M10_TIME	PA_walking	-0.1336	0.0674	-1.9814	4.75E-02
ACC_M10_TIME	2hGLUC	-0.1558	0.0741	-2.1019	3.56E-02
ACC_M10_TIME	nonHDL	0.0029	0.0272	0.1053	9.16E-01
ACC_M10_TIME	PA_moderate	0.1165	0.0807	1.4424	1.49E-01
ACC_M10_TIME	SR_Insomnia	-0.1076	0.0451	-2.3834	1.72E-02
ACC_M10_TIME	mood_swings	-0.1084	0.0437	-2.4795	1.32E-02
ACC_M10_TIME	sleep_apnea	0.2171	0.2303	0.9426	3.46E-01
ACC_M10_TIME	PA_sedentary	0.0986	0.0523	1.8859	5.93E-02
ACC_M10_TIME	SR_LongSleep	0.0931	0.0576	1.6151	1.06E-01
ACC_M10_TIME	anxiety	-0.1126	0.0553	-2.0369	4.17E-02
ACC_M10_TIME	average_spo2	0.1113	0.1076	1.0352	3.01E-01
ACC_M10_TIME	minimum_spo2	-0.0818	0.1282	-0.6382	5.23E-01
ACC_M10_TIME	Anorexia	0.0072	0.0497	0.1457	8.84E-01
ACC_M10_TIME	SR_ShortSleep	-0.1189	0.0451	-2.6377	8.35E-03
ACC_M10_TIME	SR_chronotype	0.8714	0.0422	20.6426	1.14E-94
ACC_M10_TIME	SnoringBMIadj	-0.0564	0.0422	-1.3383	1.81E-01
ACC_M10_TIME	WHRadjBMI	-0.0044	0.0481	-0.0911	9.27E-01
ACC_M10_TIME	caffein_intake	0.0852	0.0489	1.7431	8.13E-02
ACC_M10_TIME	SR_SleepDuration	0.1349	0.0401	3.3653	7.65E-04
ACC_M10_TIME	neurotisicm	-0.1081	0.0412	-2.6211	8.77E-03
ACC_M10_TIME	SR_DaytimeNapping	-0.1218	0.0392	-3.1073	1.89E-03
ACC_M10_TIME	SR_morning_person	0.865	0.0427	20.2794	1.96E-91
ACC_M10_TIME	relativeAmplitude	0.4821	0.322	1.4974	1.34E-01
ACC_M10_TIME	ACC_L5_TIME	0.8091	0.0377	21.4373	6.00E-102
ACC_M10_TIME	SR_DaytimeSleepiness	-0.1333	0.043	-3.1021	1.92E-03
ACC_M10_TIME	ACC_SLEEP_DUR	-0.0286	0.0588	-0.4852	6.28E-01
ACC_M10_TIME	ACC_SLEEP_EFF	-0.1069	0.0621	-1.7219	8.51E-02
ACC_M10_TIME	ACC_SLEEP_MIDP	0.8984	0.0422	21.3129	8.62E-101
ACC_M10_TIME	ACC_SLEEP_DUR_SD	0.3223	0.0994	3.2427	1.18E-03
ACC_M10_TIME	ACC_DIURNAL_INACT	0.0361	0.0561	0.6437	5.20E-01
ACC_M10_TIME	SR_DaytimeSleepiness_adjBMI	-0.1239	0.0426	-2.9081	3.64E-03
ACC_M10_TIME	ACC_N_SLEEP_EPISODES	-0.0092	0.0493	-0.1871	8.52E-01
ACC_N_SLEEP_EPISODES	MDD	0.0239	0.0597	0.4012	6.88E-01
ACC_N_SLEEP_EPISODES	SAD	6e-04	0.0392	0.0151	9.88E-01
ACC_N_SLEEP_EPISODES	SWB	0.0599	0.0477	1.2566	2.09E-01
ACC_N_SLEEP_EPISODES	ADHD	0.038	0.0483	0.7882	4.31E-01
ACC_N_SLEEP_EPISODES	Per90	0.0429	0.1	0.4287	6.68E-01
ACC_N_SLEEP_EPISODES	CigDay	-0.0179	0.0326	-0.5493	5.83E-01
ACC_N_SLEEP_EPISODES	FG	-0.0218	0.0328	-0.6635	5.07E-01
ACC_N_SLEEP_EPISODES	FI	0.0244	0.039	0.6242	5.32E-01
ACC_N_SLEEP_EPISODES	MI	0.052	0.032	1.6278	1.04E-01
ACC_N_SLEEP_EPISODES	PP	-0.0267	0.0222	-1.2053	2.28E-01
ACC_N_SLEEP_EPISODES	TG	0.0255	0.021	1.2135	2.25E-01
ACC_N_SLEEP_EPISODES	Drnk_Wk	0.0112	0.029	0.3878	6.98E-01
ACC_N_SLEEP_EPISODES	caffein	0.0503	0.0558	0.9025	3.67E-01
ACC_N_SLEEP_EPISODES	BMI	0.0661	0.0249	2.6553	7.92E-03
ACC_N_SLEEP_EPISODES	CAD	0.0369	0.0355	1.0379	2.99E-01
ACC_N_SLEEP_EPISODES	CRP	0.0341	0.0237	1.4374	1.51E-01
ACC_N_SLEEP_EPISODES	DBP	0.0142	0.0228	0.6212	5.34E-01
ACC_N_SLEEP_EPISODES	HDL	-0.0618	0.0252	-2.4497	1.43E-02
ACC_N_SLEEP_EPISODES	LDL	0.0055	0.0247	0.2207	8.25E-01
ACC_N_SLEEP_EPISODES	SBP	-0.0094	0.0231	-0.4062	6.85E-01
ACC_N_SLEEP_EPISODES	SCZ	0.0034	0.0247	0.1374	8.91E-01
ACC_N_SLEEP_EPISODES	T2D	0.0225	0.022	1.0212	3.07E-01
ACC_N_SLEEP_EPISODES	PTST	0.0022	0.0602	0.036	9.71E-01
ACC_N_SLEEP_EPISODES	eGFR	0.0075	0.025	0.2987	7.65E-01
ACC_N_SLEEP_EPISODES	VitD	-0.0025	0.0283	-0.0878	9.30E-01
ACC_N_SLEEP_EPISODES	HbA1c	0.0013	0.0322	0.0402	9.68E-01
ACC_N_SLEEP_EPISODES	biPol	-0.042	0.0472	-0.8902	3.73E-01
ACC_N_SLEEP_EPISODES	PA_overall	-0.0842	0.0403	-2.0912	3.65E-02
ACC_N_SLEEP_EPISODES	PA_walking	-0.0853	0.0467	-1.8279	6.76E-02
ACC_N_SLEEP_EPISODES	2hGLUC	-0.0647	0.0557	-1.1604	2.46E-01
ACC_N_SLEEP_EPISODES	nonHDL	0.0026	0.0243	0.1089	9.13E-01
ACC_N_SLEEP_EPISODES	PA_moderate	-0.1484	0.056	-2.6506	8.04E-03
ACC_N_SLEEP_EPISODES	SR_Insomnia	0.1091	0.0275	3.9657	7.32E-05
ACC_N_SLEEP_EPISODES	mood_swings	0.1035	0.0257	4.0291	5.60E-05
ACC_N_SLEEP_EPISODES	sleep_apnea	-0.0461	0.1443	-0.3196	7.49E-01
ACC_N_SLEEP_EPISODES	PA_sedentary	-0.0386	0.0391	-0.9872	3.24E-01
ACC_N_SLEEP_EPISODES	SR_LongSleep	0.2149	0.0381	5.6441	1.66E-08
ACC_N_SLEEP_EPISODES	anxiety	-0.05	0.0345	-1.4502	1.47E-01
ACC_N_SLEEP_EPISODES	average_spo2	0.0159	0.0765	0.2078	8.35E-01
ACC_N_SLEEP_EPISODES	minimum_spo2	-0.1422	0.0855	-1.6638	9.62E-02
ACC_N_SLEEP_EPISODES	Anorexia	-0.0466	0.037	-1.2599	2.08E-01
ACC_N_SLEEP_EPISODES	SR_ShortSleep	-0.025	0.0321	-0.777	4.37E-01
ACC_N_SLEEP_EPISODES	SR_chronotype	0.0299	0.0227	1.316	1.88E-01
ACC_N_SLEEP_EPISODES	SnoringBMIadj	0.0226	0.0309	0.7313	4.65E-01
ACC_N_SLEEP_EPISODES	WHRadjBMI	-0.017	0.0337	-0.5052	6.13E-01
ACC_N_SLEEP_EPISODES	caffein_intake	-0.0622	0.0398	-1.562	1.18E-01
ACC_N_SLEEP_EPISODES	SR_SleepDuration	0.1232	0.0296	4.1567	3.23E-05
ACC_N_SLEEP_EPISODES	neurotisicm	0.0644	0.0244	2.6356	8.40E-03
ACC_N_SLEEP_EPISODES	SR_DaytimeNapping	0.0354	0.0302	1.1738	2.40E-01
ACC_N_SLEEP_EPISODES	SR_morning_person	0.0267	0.0246	1.0867	2.77E-01
ACC_N_SLEEP_EPISODES	relativeAmplitude	0.1973	0.1791	1.1015	2.71E-01
ACC_N_SLEEP_EPISODES	ACC_L5_TIME	-0.0147	0.0446	-0.3307	7.41E-01
ACC_N_SLEEP_EPISODES	ACC_M10_TIME	-0.0092	0.0493	-0.1871	8.52E-01
ACC_N_SLEEP_EPISODES	SR_DaytimeSleepiness	0.0566	0.0341	1.6579	9.73E-02
ACC_N_SLEEP_EPISODES	ACC_SLEEP_DUR	-0.2142	0.0445	-4.8129	1.49E-06
ACC_N_SLEEP_EPISODES	ACC_SLEEP_EFF	-0.5178	0.0403	-12.8538	8.18E-38
ACC_N_SLEEP_EPISODES	ACC_SLEEP_MIDP	-0.031	0.0518	-0.5991	5.49E-01
ACC_N_SLEEP_EPISODES	ACC_SLEEP_DUR_SD	-0.0359	0.07	-0.5134	6.08E-01
ACC_N_SLEEP_EPISODES	ACC_DIURNAL_INACT	0.2017	0.0412	4.902	9.49E-07
ACC_N_SLEEP_EPISODES	SR_DaytimeSleepiness_adjBMI	0.0415	0.0344	1.2038	2.29E-01
ACC_SLEEP_DUR	MDD	-0.0312	0.0593	-0.5252	5.99E-01
ACC_SLEEP_DUR	SAD	-0.0223	0.0427	-0.5209	6.02E-01
ACC_SLEEP_DUR	SWB	0.0296	0.0529	0.5603	5.75E-01
ACC_SLEEP_DUR	ADHD	-0.0556	0.0557	-0.9975	3.19E-01
ACC_SLEEP_DUR	Per90	-0.1173	0.1083	-1.0828	2.79E-01
ACC_SLEEP_DUR	CigDay	0.0447	0.034	1.3155	1.88E-01
ACC_SLEEP_DUR	FG	0.0082	0.0324	0.254	8.00E-01
ACC_SLEEP_DUR	FI	0.0548	0.0462	1.1856	2.36E-01
ACC_SLEEP_DUR	MI	-0.0012	0.0305	-0.0383	9.69E-01
ACC_SLEEP_DUR	PP	0.091	0.0242	3.7642	1.67E-04
ACC_SLEEP_DUR	TG	0.0152	0.023	0.6604	5.09E-01
ACC_SLEEP_DUR	Drnk_Wk	0.1139	0.03	3.7964	1.47E-04
ACC_SLEEP_DUR	caffein	0.1377	0.0518	2.6561	7.90E-03
ACC_SLEEP_DUR	BMI	-0.0655	0.027	-2.4295	1.51E-02
ACC_SLEEP_DUR	CAD	0.0265	0.0343	0.7741	4.39E-01
ACC_SLEEP_DUR	CRP	0.0608	0.0275	2.2088	2.72E-02
ACC_SLEEP_DUR	DBP	0.0582	0.0235	2.4785	1.32E-02
ACC_SLEEP_DUR	HDL	-0.0528	0.0241	-2.19	2.85E-02
ACC_SLEEP_DUR	LDL	0.0554	0.022	2.5154	1.19E-02
ACC_SLEEP_DUR	SBP	0.0894	0.0245	3.6504	2.62E-04
ACC_SLEEP_DUR	SCZ	-0.0622	0.0276	-2.2547	2.42E-02
ACC_SLEEP_DUR	T2D	-0.0041	0.0222	-0.1857	8.53E-01
ACC_SLEEP_DUR	PTST	-0.0415	0.0625	-0.6629	5.07E-01
ACC_SLEEP_DUR	eGFR	-0.0849	0.0257	-3.3099	9.33E-04
ACC_SLEEP_DUR	VitD	0.0713	0.0373	1.912	5.59E-02
ACC_SLEEP_DUR	HbA1c	-0.0572	0.037	-1.5454	1.22E-01
ACC_SLEEP_DUR	biPol	-0.1242	0.0493	-2.5185	1.18E-02
ACC_SLEEP_DUR	PA_overall	-0.275	0.0358	-7.6898	1.47E-14
ACC_SLEEP_DUR	PA_walking	-0.2141	0.0523	-4.0913	4.29E-05
ACC_SLEEP_DUR	2hGLUC	0.0224	0.0523	0.4286	6.68E-01
ACC_SLEEP_DUR	nonHDL	0.047	0.0212	2.2186	2.65E-02
ACC_SLEEP_DUR	PA_moderate	-0.1601	0.0577	-2.7747	5.53E-03
ACC_SLEEP_DUR	SR_Insomnia	-0.12	0.0276	-4.3413	1.42E-05
ACC_SLEEP_DUR	mood_swings	0.0449	0.0316	1.4215	1.55E-01
ACC_SLEEP_DUR	sleep_apnea	0.0276	0.1521	0.1818	8.56E-01
ACC_SLEEP_DUR	PA_sedentary	-0.3913	0.039	-10.0307	1.12E-23
ACC_SLEEP_DUR	SR_LongSleep	0.4159	0.0399	10.4292	1.82E-25
ACC_SLEEP_DUR	anxiety	-0.0566	0.0416	-1.3628	1.73E-01
ACC_SLEEP_DUR	average_spo2	-0.0337	0.0869	-0.3882	6.98E-01
ACC_SLEEP_DUR	minimum_spo2	0.1376	0.0913	1.5067	1.32E-01
ACC_SLEEP_DUR	Anorexia	0.0043	0.0406	0.1059	9.16E-01
ACC_SLEEP_DUR	SR_ShortSleep	-0.3136	0.0325	-9.6617	4.39E-22
ACC_SLEEP_DUR	SR_chronotype	-0.0191	0.0299	-0.6401	5.22E-01
ACC_SLEEP_DUR	SnoringBMIadj	0.0031	0.0338	0.0919	9.27E-01
ACC_SLEEP_DUR	WHRadjBMI	-0.0493	0.0358	-1.377	1.69E-01
ACC_SLEEP_DUR	caffein_intake	0.0661	0.0417	1.5865	1.13E-01
ACC_SLEEP_DUR	SR_SleepDuration	0.4318	0.0282	15.32	5.62E-53
ACC_SLEEP_DUR	neurotisicm	-0.0058	0.03	-0.1919	8.48E-01
ACC_SLEEP_DUR	SR_DaytimeNapping	-0.0056	0.0296	-0.1891	8.50E-01
ACC_SLEEP_DUR	SR_morning_person	-0.0275	0.0312	-0.8824	3.78E-01
ACC_SLEEP_DUR	relativeAmplitude	-0.6724	0.3307	-2.0335	4.20E-02
ACC_SLEEP_DUR	ACC_L5_TIME	-0.0849	0.0477	-1.7805	7.50E-02
ACC_SLEEP_DUR	ACC_M10_TIME	-0.0286	0.0588	-0.4852	6.28E-01
ACC_SLEEP_DUR	SR_DaytimeSleepiness	-0.056	0.0335	-1.6745	9.40E-02
ACC_SLEEP_DUR	ACC_SLEEP_EFF	0.7306	0.0272	26.8711	4.79E-159
ACC_SLEEP_DUR	ACC_SLEEP_MIDP	-0.3015	0.0562	-5.3633	8.17E-08
ACC_SLEEP_DUR	ACC_SLEEP_DUR_SD	-0.1578	0.0893	-1.7673	7.72E-02
ACC_SLEEP_DUR	ACC_DIURNAL_INACT	0.481	0.0404	11.8927	1.29E-32
ACC_SLEEP_DUR	SR_DaytimeSleepiness_adjBMI	-0.0514	0.0339	-1.5168	1.29E-01
ACC_SLEEP_DUR	ACC_N_SLEEP_EPISODES	-0.2142	0.0445	-4.8129	1.49E-06
ACC_SLEEP_DUR_SD	MDD	0.2089	0.1121	1.8643	6.23E-02
ACC_SLEEP_DUR_SD	SAD	0.0178	0.0875	0.2036	8.39E-01
ACC_SLEEP_DUR_SD	SWB	-0.2548	0.0925	-2.7536	5.89E-03
ACC_SLEEP_DUR_SD	ADHD	0.3453	0.1051	3.2858	1.02E-03
ACC_SLEEP_DUR_SD	Per90	0.3307	0.2214	1.4937	1.35E-01
ACC_SLEEP_DUR_SD	CigDay	-0.1897	0.0607	-3.1274	1.76E-03
ACC_SLEEP_DUR_SD	FG	0.1247	0.0664	1.8787	6.03E-02
ACC_SLEEP_DUR_SD	FI	0.0925	0.0829	1.115	2.65E-01
ACC_SLEEP_DUR_SD	MI	0.1627	0.0644	2.5272	1.15E-02
ACC_SLEEP_DUR_SD	PP	-0.0643	0.0453	-1.4197	1.56E-01
ACC_SLEEP_DUR_SD	TG	0.175	0.0448	3.909	9.27E-05
ACC_SLEEP_DUR_SD	Drnk_Wk	-0.1804	0.0545	-3.3115	9.28E-04
ACC_SLEEP_DUR_SD	caffein	0.0119	0.0863	0.1384	8.90E-01
ACC_SLEEP_DUR_SD	BMI	0.2064	0.0572	3.6107	3.05E-04
ACC_SLEEP_DUR_SD	CAD	0.0891	0.0682	1.3063	1.91E-01
ACC_SLEEP_DUR_SD	CRP	0.1689	0.0624	2.7089	6.75E-03
ACC_SLEEP_DUR_SD	DBP	0.0226	0.0549	0.4116	6.81E-01
ACC_SLEEP_DUR_SD	HDL	-0.0922	0.0469	-1.966	4.93E-02
ACC_SLEEP_DUR_SD	LDL	0.036	0.0488	0.7361	4.62E-01
ACC_SLEEP_DUR_SD	SBP	-0.0265	0.0503	-0.5273	5.98E-01
ACC_SLEEP_DUR_SD	SCZ	0.2141	0.0547	3.9138	9.08E-05
ACC_SLEEP_DUR_SD	T2D	0.2219	0.0502	4.4162	1.00E-05
ACC_SLEEP_DUR_SD	PTST	0.1126	0.1322	0.8518	3.94E-01
ACC_SLEEP_DUR_SD	eGFR	-0.019	0.0502	-0.3779	7.06E-01
ACC_SLEEP_DUR_SD	VitD	-0.1296	0.0633	-2.0459	4.08E-02
ACC_SLEEP_DUR_SD	HbA1c	0.0924	0.0657	1.4065	1.60E-01
ACC_SLEEP_DUR_SD	biPol	0.1592	0.0903	1.7641	7.77E-02
ACC_SLEEP_DUR_SD	PA_overall	-0.1413	0.0662	-2.1356	3.27E-02
ACC_SLEEP_DUR_SD	PA_walking	-0.0484	0.0877	-0.5521	5.81E-01
ACC_SLEEP_DUR_SD	2hGLUC	0.0438	0.0985	0.445	6.56E-01
ACC_SLEEP_DUR_SD	nonHDL	0.0933	0.0478	1.9527	5.09E-02
ACC_SLEEP_DUR_SD	PA_moderate	-0.2229	0.0975	-2.286	2.23E-02
ACC_SLEEP_DUR_SD	SR_Insomnia	0.2503	0.0663	3.7779	1.58E-04
ACC_SLEEP_DUR_SD	mood_swings	0.1708	0.0588	2.9038	3.69E-03
ACC_SLEEP_DUR_SD	sleep_apnea	0.6597	0.3432	1.9221	5.46E-02
ACC_SLEEP_DUR_SD	PA_sedentary	0.2355	0.0896	2.6282	8.58E-03
ACC_SLEEP_DUR_SD	SR_LongSleep	0.0751	0.0803	0.9362	3.49E-01
ACC_SLEEP_DUR_SD	anxiety	-0.2589	0.0885	-2.9255	3.44E-03
ACC_SLEEP_DUR_SD	average_spo2	-0.0764	0.1822	-0.4193	6.75E-01
ACC_SLEEP_DUR_SD	minimum_spo2	-0.1377	0.1674	-0.8223	4.11E-01
ACC_SLEEP_DUR_SD	Anorexia	-0.0625	0.0661	-0.9454	3.44E-01
ACC_SLEEP_DUR_SD	SR_ShortSleep	0.4101	0.065	6.3072	2.84E-10
ACC_SLEEP_DUR_SD	SR_chronotype	-0.1763	0.0487	-3.6226	2.92E-04
ACC_SLEEP_DUR_SD	SnoringBMIadj	-0.0162	0.0637	-0.2551	7.99E-01
ACC_SLEEP_DUR_SD	WHRadjBMI	0.1452	0.0697	2.083	3.73E-02
ACC_SLEEP_DUR_SD	caffein_intake	-0.0854	0.089	-0.959	3.38E-01
ACC_SLEEP_DUR_SD	SR_SleepDuration	-0.2576	0.0566	-4.5492	5.39E-06
ACC_SLEEP_DUR_SD	neurotisicm	0.0463	0.055	0.8426	3.99E-01
ACC_SLEEP_DUR_SD	SR_DaytimeNapping	0.1469	0.0556	2.6422	8.24E-03
ACC_SLEEP_DUR_SD	SR_morning_person	-0.2074	0.0513	-4.0437	5.26E-05
ACC_SLEEP_DUR_SD	relativeAmplitude	1.0901	0.4929	2.2115	2.70E-02
ACC_SLEEP_DUR_SD	ACC_L5_TIME	0.3064	0.0939	3.2635	1.10E-03
ACC_SLEEP_DUR_SD	ACC_M10_TIME	0.3223	0.0994	3.2427	1.18E-03
ACC_SLEEP_DUR_SD	SR_DaytimeSleepiness	0.1488	0.0655	2.2734	2.30E-02
ACC_SLEEP_DUR_SD	ACC_SLEEP_DUR	-0.1578	0.0893	-1.7673	7.72E-02
ACC_SLEEP_DUR_SD	ACC_SLEEP_EFF	-0.2973	0.0782	-3.8038	1.42E-04
ACC_SLEEP_DUR_SD	ACC_SLEEP_MIDP	0.3842	0.1195	3.214	1.31E-03
ACC_SLEEP_DUR_SD	ACC_DIURNAL_INACT	0.146	0.0853	1.7126	8.68E-02
ACC_SLEEP_DUR_SD	SR_DaytimeSleepiness_adjBMI	0.1068	0.0646	1.6536	9.82E-02
ACC_SLEEP_DUR_SD	ACC_N_SLEEP_EPISODES	-0.0359	0.07	-0.5134	6.08E-01
ACC_SLEEP_EFF	MDD	-0.103	0.0724	-1.4237	1.55E-01
ACC_SLEEP_EFF	SAD	-0.0205	0.0497	-0.4125	6.80E-01
ACC_SLEEP_EFF	SWB	0.1699	0.0569	2.9835	2.85E-03
ACC_SLEEP_EFF	ADHD	-0.109	0.0561	-1.9418	5.22E-02
ACC_SLEEP_EFF	Per90	-0.2383	0.1304	-1.8269	6.77E-02
ACC_SLEEP_EFF	CigDay	0.0829	0.037	2.2426	2.49E-02
ACC_SLEEP_EFF	FG	0.0028	0.0348	0.0801	9.36E-01
ACC_SLEEP_EFF	FI	-0.06	0.0418	-1.4344	1.51E-01
ACC_SLEEP_EFF	MI	-0.1074	0.034	-3.1567	1.60E-03
ACC_SLEEP_EFF	PP	0.0426	0.0254	1.6778	9.34E-02
ACC_SLEEP_EFF	TG	-0.0647	0.0238	-2.7166	6.59E-03
ACC_SLEEP_EFF	Drnk_Wk	0.0076	0.0357	0.2138	8.31E-01
ACC_SLEEP_EFF	caffein	0.1149	0.0637	1.8035	7.13E-02
ACC_SLEEP_EFF	BMI	-0.1608	0.0309	-5.203	1.96E-07
ACC_SLEEP_EFF	CAD	-0.0586	0.0391	-1.4994	1.34E-01
ACC_SLEEP_EFF	CRP	-0.047	0.0271	-1.7373	8.23E-02
ACC_SLEEP_EFF	DBP	-0.006	0.026	-0.2309	8.17E-01
ACC_SLEEP_EFF	HDL	0.0449	0.0263	1.7088	8.75E-02
ACC_SLEEP_EFF	LDL	0.0231	0.0246	0.9392	3.48E-01
ACC_SLEEP_EFF	SBP	0.0258	0.0267	0.9661	3.34E-01
ACC_SLEEP_EFF	SCZ	-0.1227	0.0326	-3.7641	1.67E-04
ACC_SLEEP_EFF	T2D	-0.1313	0.0239	-5.4866	4.10E-08
ACC_SLEEP_EFF	PTST	-0.0576	0.0686	-0.8397	4.01E-01
ACC_SLEEP_EFF	eGFR	-0.0067	0.0285	-0.2346	8.14E-01
ACC_SLEEP_EFF	VitD	0.1622	0.0402	4.0376	5.40E-05
ACC_SLEEP_EFF	HbA1c	-0.0414	0.0397	-1.0424	2.97E-01
ACC_SLEEP_EFF	biPol	-0.074	0.0596	-1.2409	2.15E-01
ACC_SLEEP_EFF	PA_overall	0.1336	0.0427	3.1288	1.75E-03
ACC_SLEEP_EFF	PA_walking	0.1196	0.0537	2.2275	2.59E-02
ACC_SLEEP_EFF	2hGLUC	-0.0186	0.0653	-0.2849	7.76E-01
ACC_SLEEP_EFF	nonHDL	0.0129	0.0234	0.5512	5.81E-01
ACC_SLEEP_EFF	PA_moderate	0.1607	0.066	2.4341	1.49E-02
ACC_SLEEP_EFF	SR_Insomnia	-0.1888	0.0348	-5.4249	5.80E-08
ACC_SLEEP_EFF	mood_swings	-0.0567	0.0364	-1.5571	1.19E-01
ACC_SLEEP_EFF	sleep_apnea	-0.0701	0.1627	-0.431	6.67E-01
ACC_SLEEP_EFF	PA_sedentary	-0.376	0.04	-9.4114	4.89E-21
ACC_SLEEP_EFF	SR_LongSleep	0.1879	0.0469	4.0085	6.11E-05
ACC_SLEEP_EFF	anxiety	0.041	0.0448	0.9159	3.60E-01
ACC_SLEEP_EFF	average_spo2	0.0108	0.0964	0.1116	9.11E-01
ACC_SLEEP_EFF	minimum_spo2	0.2652	0.1225	2.1654	3.04E-02
ACC_SLEEP_EFF	Anorexia	0.0531	0.0497	1.0674	2.86E-01
ACC_SLEEP_EFF	SR_ShortSleep	-0.3564	0.0394	-9.0342	1.65E-19
ACC_SLEEP_EFF	SR_chronotype	0.0994	0.0302	3.2952	9.84E-04
ACC_SLEEP_EFF	SnoringBMIadj	-0.0183	0.0382	-0.478	6.33E-01
ACC_SLEEP_EFF	WHRadjBMI	-0.026	0.0407	-0.6388	5.23E-01
ACC_SLEEP_EFF	caffein_intake	0.0257	0.0424	0.6064	5.44E-01
ACC_SLEEP_EFF	SR_SleepDuration	0.35	0.0347	10.09	6.11E-24
ACC_SLEEP_EFF	neurotisicm	-0.0447	0.0338	-1.3208	1.87E-01
ACC_SLEEP_EFF	SR_DaytimeNapping	-0.1296	0.0319	-4.0643	4.82E-05
ACC_SLEEP_EFF	SR_morning_person	0.0908	0.0312	2.9084	3.63E-03
ACC_SLEEP_EFF	relativeAmplitude	-0.8763	0.3837	-2.2841	2.24E-02
ACC_SLEEP_EFF	ACC_L5_TIME	-0.1827	0.054	-3.3811	7.22E-04
ACC_SLEEP_EFF	ACC_M10_TIME	-0.1069	0.0621	-1.7219	8.51E-02
ACC_SLEEP_EFF	SR_DaytimeSleepiness	-0.223	0.0366	-6.0952	1.09E-09
ACC_SLEEP_EFF	ACC_SLEEP_DUR	0.7306	0.0272	26.8711	4.79E-159
ACC_SLEEP_EFF	ACC_SLEEP_MIDP	-0.1412	0.0585	-2.4141	1.58E-02
ACC_SLEEP_EFF	ACC_SLEEP_DUR_SD	-0.2973	0.0782	-3.8038	1.42E-04
ACC_SLEEP_EFF	ACC_DIURNAL_INACT	-0.1782	0.0497	-3.5852	3.37E-04
ACC_SLEEP_EFF	SR_DaytimeSleepiness_adjBMI	-0.1976	0.0367	-5.3828	7.33E-08
ACC_SLEEP_EFF	ACC_N_SLEEP_EPISODES	-0.5178	0.0403	-12.8538	8.18E-38
ACC_SLEEP_MIDP	MDD	0.1063	0.08	1.3295	1.84E-01
ACC_SLEEP_MIDP	SAD	0.0338	0.0589	0.5742	5.66E-01
ACC_SLEEP_MIDP	SWB	-0.0347	0.0746	-0.4652	6.42E-01
ACC_SLEEP_MIDP	ADHD	-0.0013	0.0687	-0.0191	9.85E-01
ACC_SLEEP_MIDP	Per90	-0.0051	0.1442	-0.0353	9.72E-01
ACC_SLEEP_MIDP	CigDay	0.0196	0.0415	0.473	6.36E-01
ACC_SLEEP_MIDP	FG	0.0094	0.0473	0.1983	8.43E-01
ACC_SLEEP_MIDP	FI	0.0366	0.0607	0.6029	5.47E-01
ACC_SLEEP_MIDP	MI	0.0721	0.0409	1.7641	7.77E-02
ACC_SLEEP_MIDP	PP	-0.0265	0.0356	-0.7429	4.58E-01
ACC_SLEEP_MIDP	TG	0.011	0.0336	0.3275	7.43E-01
ACC_SLEEP_MIDP	Drnk_Wk	-0.2207	0.039	-5.6635	1.48E-08
ACC_SLEEP_MIDP	caffein	-0.0388	0.0684	-0.5668	5.71E-01
ACC_SLEEP_MIDP	BMI	-0.03	0.0346	-0.8679	3.85E-01
ACC_SLEEP_MIDP	CAD	0.0686	0.0483	1.4209	1.55E-01
ACC_SLEEP_MIDP	CRP	-0.0153	0.038	-0.4026	6.87E-01
ACC_SLEEP_MIDP	DBP	-0.0515	0.0345	-1.495	1.35E-01
ACC_SLEEP_MIDP	HDL	-0.02	0.0284	-0.7055	4.81E-01
ACC_SLEEP_MIDP	LDL	-0.0031	0.0273	-0.1131	9.10E-01
ACC_SLEEP_MIDP	SBP	-0.0434	0.0368	-1.1805	2.38E-01
ACC_SLEEP_MIDP	SCZ	0.0722	0.035	2.0646	3.90E-02
ACC_SLEEP_MIDP	T2D	-0.0742	0.0338	-2.1964	2.81E-02
ACC_SLEEP_MIDP	PTST	-0.0656	0.0903	-0.7261	4.68E-01
ACC_SLEEP_MIDP	eGFR	0.0726	0.0397	1.8277	6.76E-02
ACC_SLEEP_MIDP	VitD	-0.0846	0.0424	-1.9965	4.59E-02
ACC_SLEEP_MIDP	HbA1c	-0.0372	0.0435	-0.8545	3.93E-01
ACC_SLEEP_MIDP	biPol	0.1458	0.0671	2.1711	2.99E-02
ACC_SLEEP_MIDP	PA_overall	-0.0295	0.0505	-0.5849	5.59E-01
ACC_SLEEP_MIDP	PA_walking	-0.0519	0.0608	-0.8541	3.93E-01
ACC_SLEEP_MIDP	2hGLUC	-0.0621	0.0671	-0.9256	3.55E-01
ACC_SLEEP_MIDP	nonHDL	0.0022	0.0262	0.0843	9.33E-01
ACC_SLEEP_MIDP	PA_moderate	0.0443	0.0827	0.5358	5.92E-01
ACC_SLEEP_MIDP	SR_Insomnia	-0.064	0.0444	-1.4429	1.49E-01
ACC_SLEEP_MIDP	mood_swings	-0.0742	0.0425	-1.7461	8.08E-02
ACC_SLEEP_MIDP	sleep_apnea	0.0167	0.225	0.0741	9.41E-01
ACC_SLEEP_MIDP	PA_sedentary	0.2739	0.0534	5.133	2.85E-07
ACC_SLEEP_MIDP	SR_LongSleep	-0.0119	0.0597	-0.1992	8.42E-01
ACC_SLEEP_MIDP	anxiety	-0.0886	0.0553	-1.6034	1.09E-01
ACC_SLEEP_MIDP	average_spo2	0.0452	0.1256	0.3599	7.19E-01
ACC_SLEEP_MIDP	minimum_spo2	-0.1182	0.1202	-0.9832	3.26E-01
ACC_SLEEP_MIDP	Anorexia	-0.0541	0.0499	-1.0837	2.79E-01
ACC_SLEEP_MIDP	SR_ShortSleep	-0.0467	0.0443	-1.0526	2.93E-01
ACC_SLEEP_MIDP	SR_chronotype	0.8464	0.0417	20.296	1.39E-91
ACC_SLEEP_MIDP	SnoringBMIadj	-0.0156	0.0467	-0.3338	7.39E-01
ACC_SLEEP_MIDP	WHRadjBMI	0.0832	0.0477	1.7451	8.10E-02
ACC_SLEEP_MIDP	caffein_intake	0.022	0.0505	0.4356	6.63E-01
ACC_SLEEP_MIDP	SR_SleepDuration	0.0376	0.0438	0.8578	3.91E-01
ACC_SLEEP_MIDP	neurotisicm	-0.0911	0.041	-2.2247	2.61E-02
ACC_SLEEP_MIDP	SR_DaytimeNapping	-0.1585	0.037	-4.2836	1.84E-05
ACC_SLEEP_MIDP	SR_morning_person	0.8537	0.0431	19.8127	2.32E-87
ACC_SLEEP_MIDP	relativeAmplitude	0.6719	0.3871	1.7358	8.26E-02
ACC_SLEEP_MIDP	ACC_L5_TIME	0.8857	0.0388	22.8137	3.35E-115
ACC_SLEEP_MIDP	ACC_M10_TIME	0.8984	0.0422	21.3129	8.62E-101
ACC_SLEEP_MIDP	SR_DaytimeSleepiness	-0.1225	0.0401	-3.0546	2.25E-03
ACC_SLEEP_MIDP	ACC_SLEEP_DUR	-0.3015	0.0562	-5.3633	8.17E-08
ACC_SLEEP_MIDP	ACC_SLEEP_EFF	-0.1412	0.0585	-2.4141	1.58E-02
ACC_SLEEP_MIDP	ACC_SLEEP_DUR_SD	0.3842	0.1195	3.214	1.31E-03
ACC_SLEEP_MIDP	ACC_DIURNAL_INACT	-0.2166	0.0523	-4.1425	3.44E-05
ACC_SLEEP_MIDP	SR_DaytimeSleepiness_adjBMI	-0.1188	0.0393	-3.0249	2.49E-03
ACC_SLEEP_MIDP	ACC_N_SLEEP_EPISODES	-0.031	0.0518	-0.5991	5.49E-01
ADHD	MDD	0.4119	0.0742	5.5525	2.82E-08
ADHD	SAD	0.0012	0.0516	0.0242	9.81E-01
ADHD	SWB	-0.293	0.057	-5.141	2.73E-07
ADHD	Per90	-0.0199	0.1347	-0.1478	8.83E-01
ADHD	CigDay	-0.4939	0.0437	-11.3101	1.17E-29
ADHD	FG	0.0481	0.0387	1.2431	2.14E-01
ADHD	FI	-0.0009	0.0455	-0.0193	9.85E-01
ADHD	MI	0.2896	0.0377	7.6903	1.47E-14
ADHD	PP	-0.0343	0.0329	-1.0428	2.97E-01
ADHD	TG	0.2141	0.0333	6.4334	1.25E-10
ADHD	Drnk_Wk	-0.1721	0.0349	-4.9375	7.91E-07
ADHD	caffein	0.0732	0.0666	1.0988	2.72E-01
ADHD	BMI	0.2568	0.0335	7.6599	1.86E-14
ADHD	CAD	0.2507	0.0438	5.726	1.03E-08
ADHD	CRP	0.2873	0.0379	7.5889	3.23E-14
ADHD	DBP	-0.0452	0.0305	-1.4821	1.38E-01
ADHD	HDL	-0.2212	0.0319	-6.9379	3.98E-12
ADHD	LDL	0.0373	0.0324	1.1494	2.50E-01
ADHD	SBP	-0.0405	0.0325	-1.2474	2.12E-01
ADHD	SCZ	0.1693	0.0373	4.5339	5.79E-06
ADHD	T2D	0.3142	0.0288	10.9018	1.13E-27
ADHD	PTST	0.6566	0.0925	7.0988	1.26E-12
ADHD	eGFR	-0.0355	0.0298	-1.1928	2.33E-01
ADHD	VitD	0.0037	0.0361	0.1017	9.19E-01
ADHD	HbA1c	0.1296	0.0395	3.281	1.03E-03
ADHD	biPol	0.1309	0.056	2.338	1.94E-02
ADHD	PA_overall	-0.052	0.0504	-1.033	3.02E-01
ADHD	PA_walking	-0.0426	0.0561	-0.7583	4.48E-01
ADHD	2hGLUC	-0.0239	0.0673	-0.3549	7.23E-01
ADHD	nonHDL	0.085	0.0307	2.7707	5.59E-03
ADHD	PA_moderate	0.0212	0.0764	0.2773	7.82E-01
ADHD	SR_Insomnia	0.3215	0.0381	8.4321	3.39E-17
ADHD	mood_swings	0.3975	0.0385	10.3328	5.01E-25
ADHD	sleep_apnea	-0.0613	0.2332	-0.2627	7.93E-01
ADHD	PA_sedentary	-0.0133	0.0518	-0.256	7.98E-01
ADHD	SR_LongSleep	0.3704	0.0514	7.204	5.85E-13
ADHD	anxiety	-0.2521	0.0418	-6.0315	1.62E-09
ADHD	average_spo2	-0.072	0.0991	-0.7266	4.67E-01
ADHD	minimum_spo2	-0.0067	0.1149	-0.058	9.54E-01
ADHD	Anorexia	0.0059	0.0507	0.1164	9.07E-01
ADHD	SR_ShortSleep	0.3444	0.0408	8.4349	3.31E-17
ADHD	SR_chronotype	0.0288	0.0336	0.8562	3.92E-01
ADHD	SnoringBMIadj	0.014	0.042	0.3332	7.39E-01
ADHD	WHRadjBMI	0.1866	0.0537	3.4722	5.16E-04
ADHD	caffein_intake	-0.2901	0.046	-6.3014	2.95E-10
ADHD	SR_SleepDuration	-0.0806	0.0399	-2.0179	4.36E-02
ADHD	neurotisicm	0.2329	0.0353	6.6006	4.09E-11
ADHD	SR_DaytimeNapping	0.2361	0.0389	6.0685	1.29E-09
ADHD	SR_morning_person	-0.0213	0.0349	-0.6106	5.41E-01
ADHD	relativeAmplitude	0.4417	0.2586	1.7081	8.76E-02
ADHD	ACC_L5_TIME	0.0639	0.0622	1.0274	3.04E-01
ADHD	ACC_M10_TIME	0.0482	0.0652	0.7404	4.59E-01
ADHD	SR_DaytimeSleepiness	0.1434	0.0407	3.5265	4.21E-04
ADHD	ACC_SLEEP_DUR	-0.0556	0.0557	-0.9975	3.19E-01
ADHD	ACC_SLEEP_EFF	-0.109	0.0561	-1.9418	5.22E-02
ADHD	ACC_SLEEP_MIDP	-0.0013	0.0687	-0.0191	9.85E-01
ADHD	ACC_SLEEP_DUR_SD	0.3453	0.1051	3.2858	1.02E-03
ADHD	ACC_DIURNAL_INACT	0.1125	0.0509	2.211	2.70E-02
ADHD	SR_DaytimeSleepiness_adjBMI	0.0739	0.0409	1.8079	7.06E-02
ADHD	ACC_N_SLEEP_EPISODES	0.038	0.0483	0.7882	4.31E-01
CigDay	MDD	-0.3127	0.0585	-5.3436	9.11E-08
CigDay	SAD	-0.0219	0.0363	-0.6034	5.46E-01
CigDay	SWB	0.132	0.0457	2.8868	3.89E-03
CigDay	ADHD	-0.4939	0.0437	-11.3101	1.17E-29
CigDay	Per90	-0.0527	0.0814	-0.6471	5.18E-01
CigDay	FG	-0.0361	0.0298	-1.2112	2.26E-01
CigDay	FI	-0.084	0.0324	-2.5947	9.47E-03
CigDay	MI	-0.3348	0.0414	-8.0835	6.29E-16
CigDay	PP	-0.0065	0.0196	-0.3342	7.38E-01
CigDay	TG	-0.208	0.0242	-8.6095	7.34E-18
CigDay	Drnk_Wk	0.0797	0.0302	2.6351	8.41E-03
CigDay	caffein	-0.0674	0.0398	-1.6958	8.99E-02
CigDay	BMI	-0.2521	0.0396	-6.3714	1.87E-10
CigDay	CAD	-0.2727	0.0484	-5.6304	1.80E-08
CigDay	CRP	-0.268	0.0323	-8.3085	9.69E-17
CigDay	DBP	-0.0505	0.0213	-2.3669	1.79E-02
CigDay	HDL	0.1961	0.0242	8.0942	5.76E-16
CigDay	LDL	-0.0587	0.0185	-3.1841	1.45E-03
CigDay	SBP	-0.0363	0.0198	-1.8292	6.74E-02
CigDay	SCZ	-0.1133	0.0232	-4.883	1.04E-06
CigDay	T2D	-0.2938	0.0295	-9.9458	2.63E-23
CigDay	PTST	-0.4168	0.0723	-5.7611	8.36E-09
CigDay	eGFR	-0.0095	0.0209	-0.4534	6.50E-01
CigDay	VitD	0.1604	0.0248	6.4723	9.65E-11
CigDay	HbA1c	-0.1473	0.0301	-4.8994	9.61E-07
CigDay	biPol	0.0352	0.0376	0.938	3.48E-01
CigDay	PA_overall	0.1729	0.0321	5.3943	6.88E-08
CigDay	PA_walking	0.0887	0.039	2.2749	2.29E-02
CigDay	2hGLUC	-0.0131	0.0428	-0.3052	7.60E-01
CigDay	nonHDL	-0.1011	0.0187	-5.4169	6.07E-08
CigDay	PA_moderate	0.1763	0.0524	3.3624	7.73E-04
CigDay	SR_Insomnia	-0.2258	0.0301	-7.5024	6.27E-14
CigDay	mood_swings	-0.2149	0.0305	-7.0527	1.75E-12
CigDay	sleep_apnea	-0.0143	0.1113	-0.1288	8.97E-01
CigDay	PA_sedentary	-0.1491	0.0331	-4.5054	6.63E-06
CigDay	SR_LongSleep	-0.2633	0.0404	-6.5131	7.36E-11
CigDay	anxiety	0.2024	0.0361	5.613	1.99E-08
CigDay	average_spo2	0.129	0.0653	1.9762	4.81E-02
CigDay	minimum_spo2	0.0471	0.0696	0.677	4.98E-01
CigDay	Anorexia	0.0698	0.0346	2.02	4.34E-02
CigDay	SR_ShortSleep	-0.2228	0.0313	-7.1213	1.07E-12
CigDay	SR_chronotype	-0.008	0.0247	-0.3234	7.46E-01
CigDay	SnoringBMIadj	-0.0309	0.0272	-1.1373	2.55E-01
CigDay	WHRadjBMI	-0.1257	0.0305	-4.1264	3.68E-05
CigDay	caffein_intake	0.5027	0.0601	8.3621	6.16E-17
CigDay	SR_SleepDuration	0.0511	0.027	1.8901	5.87E-02
CigDay	neurotisicm	-0.1243	0.0255	-4.8694	1.12E-06
CigDay	SR_DaytimeNapping	-0.2115	0.0247	-8.5545	1.18E-17
CigDay	SR_morning_person	0.0134	0.0253	0.5292	5.97E-01
CigDay	relativeAmplitude	-0.2759	0.1795	-1.5366	1.24E-01
CigDay	ACC_L5_TIME	-0.0266	0.0398	-0.6681	5.04E-01
CigDay	ACC_M10_TIME	0.0874	0.0445	1.9648	4.94E-02
CigDay	SR_DaytimeSleepiness	-0.0767	0.0296	-2.5909	9.57E-03
CigDay	ACC_SLEEP_DUR	0.0447	0.034	1.3155	1.88E-01
CigDay	ACC_SLEEP_EFF	0.0829	0.037	2.2426	2.49E-02
CigDay	ACC_SLEEP_MIDP	0.0196	0.0415	0.473	6.36E-01
CigDay	ACC_SLEEP_DUR_SD	-0.1897	0.0607	-3.1274	1.76E-03
CigDay	ACC_DIURNAL_INACT	-0.1742	0.0315	-5.5324	3.16E-08
CigDay	SR_DaytimeSleepiness_adjBMI	-0.0137	0.028	-0.4901	6.24E-01
CigDay	ACC_N_SLEEP_EPISODES	-0.0179	0.0326	-0.5493	5.83E-01
Drnk_Wk	MDD	-0.0624	0.0483	-1.2913	1.97E-01
Drnk_Wk	SAD	0.0043	0.0354	0.121	9.04E-01
Drnk_Wk	SWB	0.1144	0.0398	2.8757	4.03E-03
Drnk_Wk	ADHD	-0.1721	0.0349	-4.9375	7.91E-07
Drnk_Wk	Per90	0.0977	0.0724	1.3501	1.77E-01
Drnk_Wk	CigDay	0.0797	0.0302	2.6351	8.41E-03
Drnk_Wk	FG	-0.0368	0.0295	-1.2477	2.12E-01
Drnk_Wk	FI	0.1293	0.0295	4.3855	1.16E-05
Drnk_Wk	MI	-0.0071	0.0247	-0.2859	7.75E-01
Drnk_Wk	PP	0.0373	0.0181	2.06	3.94E-02
Drnk_Wk	TG	0.0901	0.023	3.917	8.96E-05
Drnk_Wk	caffein	0.3313	0.0408	8.1182	4.73E-16
Drnk_Wk	BMI	0.0552	0.0238	2.3186	2.04E-02
Drnk_Wk	CAD	0.0179	0.0276	0.6469	5.18E-01
Drnk_Wk	CRP	0.0404	0.024	1.6828	9.24E-02
Drnk_Wk	DBP	0.0051	0.0192	0.2675	7.89E-01
Drnk_Wk	HDL	-0.2005	0.0188	-10.66	1.57E-26
Drnk_Wk	LDL	0.0168	0.0192	0.8735	3.82E-01
Drnk_Wk	SBP	0.0248	0.0181	1.3734	1.70E-01
Drnk_Wk	SCZ	-0.0917	0.0201	-4.5719	4.83E-06
Drnk_Wk	T2D	0.0915	0.0192	4.7664	1.88E-06
Drnk_Wk	PTST	0.0732	0.051	1.4358	1.51E-01
Drnk_Wk	eGFR	-0.0723	0.0214	-3.373	7.44E-04
Drnk_Wk	VitD	-0.0651	0.0224	-2.9087	3.63E-03
Drnk_Wk	HbA1c	0.0988	0.0277	3.5648	3.64E-04
Drnk_Wk	biPol	-0.1166	0.0371	-3.1435	1.67E-03
Drnk_Wk	PA_overall	-0.0683	0.0295	-2.3181	2.04E-02
Drnk_Wk	PA_walking	-0.061	0.0341	-1.7913	7.32E-02
Drnk_Wk	2hGLUC	0.166	0.046	3.6061	3.11E-04
Drnk_Wk	nonHDL	0.0454	0.022	2.0674	3.87E-02
Drnk_Wk	PA_moderate	-0.0429	0.0477	-0.8994	3.68E-01
Drnk_Wk	SR_Insomnia	-0.0903	0.0226	-4.0038	6.23E-05
Drnk_Wk	mood_swings	-0.0064	0.0265	-0.2425	8.08E-01
Drnk_Wk	sleep_apnea	0.0968	0.1308	0.7397	4.60E-01
Drnk_Wk	PA_sedentary	-0.0424	0.0328	-1.2939	1.96E-01
Drnk_Wk	SR_LongSleep	-0.0173	0.0314	-0.5512	5.81E-01
Drnk_Wk	anxiety	0.0279	0.0319	0.8726	3.83E-01
Drnk_Wk	average_spo2	0.0517	0.0572	0.9038	3.66E-01
Drnk_Wk	minimum_spo2	0.0178	0.07	0.2536	8.00E-01
Drnk_Wk	Anorexia	-0.0046	0.0274	-0.1671	8.67E-01
Drnk_Wk	SR_ShortSleep	-0.0153	0.025	-0.615	5.39E-01
Drnk_Wk	SR_chronotype	0.1199	0.0197	6.0799	1.20E-09
Drnk_Wk	SnoringBMIadj	-0.0298	0.0262	-1.1388	2.55E-01
Drnk_Wk	WHRadjBMI	-0.0839	0.0315	-2.6675	7.64E-03
Drnk_Wk	caffein_intake	0.1309	0.0302	4.3393	1.43E-05
Drnk_Wk	SR_SleepDuration	0.0074	0.0231	0.3183	7.50E-01
Drnk_Wk	neurotisicm	-0.0048	0.0236	-0.202	8.40E-01
Drnk_Wk	SR_DaytimeNapping	0.0034	0.0263	0.1301	8.96E-01
Drnk_Wk	SR_morning_person	0.1294	0.0203	6.3628	1.98E-10
Drnk_Wk	relativeAmplitude	-0.1234	0.1504	-0.8208	4.12E-01
Drnk_Wk	ACC_L5_TIME	-0.0458	0.0364	-1.2585	2.08E-01
Drnk_Wk	ACC_M10_TIME	-0.2215	0.0406	-5.459	4.79E-08
Drnk_Wk	SR_DaytimeSleepiness	0.0325	0.0273	1.1874	2.35E-01
Drnk_Wk	ACC_SLEEP_DUR	0.1139	0.03	3.7964	1.47E-04
Drnk_Wk	ACC_SLEEP_EFF	0.0076	0.0357	0.2138	8.31E-01
Drnk_Wk	ACC_SLEEP_MIDP	-0.2207	0.039	-5.6635	1.48E-08
Drnk_Wk	ACC_SLEEP_DUR_SD	-0.1804	0.0545	-3.3115	9.28E-04
Drnk_Wk	ACC_DIURNAL_INACT	0.1195	0.0307	3.894	9.86E-05
Drnk_Wk	SR_DaytimeSleepiness_adjBMI	0.0283	0.027	1.0503	2.94E-01
Drnk_Wk	ACC_N_SLEEP_EPISODES	0.0112	0.029	0.3878	6.98E-01
MDD	SAD	0.0694	0.078	0.89	3.73E-01
MDD	SWB	-0.4402	0.0776	-5.6699	1.43E-08
MDD	ADHD	0.4119	0.0742	5.5525	2.82E-08
MDD	Per90	-0.0817	0.1577	-0.5178	6.05E-01
MDD	CigDay	-0.3127	0.0585	-5.3436	9.11E-08
MDD	FG	-0.0283	0.0602	-0.4699	6.38E-01
MDD	FI	0.015	0.0547	0.2745	7.84E-01
MDD	MI	0.2137	0.0457	4.6774	2.91E-06
MDD	PP	-0.0421	0.0382	-1.1011	2.71E-01
MDD	TG	0.1537	0.0306	5.0275	4.97E-07
MDD	Drnk_Wk	-0.0624	0.0483	-1.2913	1.97E-01
MDD	caffein	0.1708	0.0808	2.1147	3.45E-02
MDD	BMI	0.2136	0.0421	5.0744	3.89E-07
MDD	CAD	0.1367	0.0551	2.4821	1.31E-02
MDD	CRP	0.1332	0.0404	3.2966	9.79E-04
MDD	DBP	0.0325	0.0362	0.8972	3.70E-01
MDD	HDL	-0.0893	0.034	-2.6268	8.62E-03
MDD	LDL	0.0017	0.0332	0.0498	9.60E-01
MDD	SBP	-0.0093	0.0372	-0.2499	8.03E-01
MDD	SCZ	0.267	0.0377	7.087	1.37E-12
MDD	T2D	0.235	0.0377	6.2278	4.73E-10
MDD	PTST	0.7399	0.1051	7.0364	1.97E-12
MDD	eGFR	0.0297	0.0347	0.8559	3.92E-01
MDD	VitD	-0.1347	0.0429	-3.1432	1.67E-03
MDD	HbA1c	0.1048	0.0511	2.0521	4.02E-02
MDD	biPol	0.295	0.0708	4.1654	3.11E-05
MDD	PA_overall	-0.1388	0.0596	-2.328	1.99E-02
MDD	PA_walking	-0.2059	0.0728	-2.8281	4.68E-03
MDD	2hGLUC	0.0878	0.0841	1.0446	2.96E-01
MDD	nonHDL	0.0341	0.0325	1.0463	2.95E-01
MDD	PA_moderate	-0.1518	0.0961	-1.5796	1.14E-01
MDD	SR_Insomnia	0.381	0.0485	7.8625	3.77E-15
MDD	mood_swings	0.606	0.0517	11.7147	1.07E-31
MDD	sleep_apnea	0.2646	0.2444	1.0826	2.79E-01
MDD	PA_sedentary	0.0726	0.0647	1.1215	2.62E-01
MDD	SR_LongSleep	0.2964	0.0648	4.5757	4.75E-06
MDD	anxiety	-0.0101	0.0568	-0.1784	8.58E-01
MDD	average_spo2	-0.0579	0.116	-0.4992	6.18E-01
MDD	minimum_spo2	-0.0455	0.1275	-0.3565	7.21E-01
MDD	Anorexia	0.2108	0.0628	3.3581	7.85E-04
MDD	SR_ShortSleep	0.2529	0.0541	4.6762	2.92E-06
MDD	SR_chronotype	-0.0381	0.0397	-0.9601	3.37E-01
MDD	SnoringBMIadj	0.05	0.0502	0.9971	3.19E-01
MDD	WHRadjBMI	0.1228	0.0596	2.0614	3.93E-02
MDD	caffein_intake	-0.1039	0.0571	-1.8193	6.89E-02
MDD	SR_SleepDuration	-0.0567	0.0455	-1.2467	2.13E-01
MDD	neurotisicm	0.5114	0.0467	10.9534	6.40E-28
MDD	SR_DaytimeNapping	0.2536	0.0442	5.7366	9.66E-09
MDD	SR_morning_person	-0.0653	0.0407	-1.6042	1.09E-01
MDD	relativeAmplitude	0.5937	0.3596	1.6512	9.87E-02
MDD	ACC_L5_TIME	0.122	0.0648	1.8834	5.96E-02
MDD	ACC_M10_TIME	0.0519	0.0773	0.672	5.02E-01
MDD	SR_DaytimeSleepiness	0.1737	0.0497	3.4933	4.77E-04
MDD	ACC_SLEEP_DUR	-0.0312	0.0593	-0.5252	5.99E-01
MDD	ACC_SLEEP_EFF	-0.103	0.0724	-1.4237	1.55E-01
MDD	ACC_SLEEP_MIDP	0.1063	0.08	1.3295	1.84E-01
MDD	ACC_SLEEP_DUR_SD	0.2089	0.1121	1.8643	6.23E-02
MDD	ACC_DIURNAL_INACT	0.247	0.0566	4.3674	1.26E-05
MDD	SR_DaytimeSleepiness_adjBMI	0.1359	0.0501	2.7121	6.68E-03
MDD	ACC_N_SLEEP_EPISODES	0.0239	0.0597	0.4012	6.88E-01
PA_moderate	MDD	-0.1518	0.0961	-1.5796	1.14E-01
PA_moderate	SAD	-0.134	0.0814	-1.646	9.98E-02
PA_moderate	SWB	0.0943	0.0636	1.4828	1.38E-01
PA_moderate	ADHD	0.0212	0.0764	0.2773	7.82E-01
PA_moderate	Per90	-0.0326	0.1663	-0.1958	8.45E-01
PA_moderate	CigDay	0.1763	0.0524	3.3624	7.73E-04
PA_moderate	FG	-0.0224	0.0434	-0.5171	6.05E-01
PA_moderate	FI	-0.1455	0.0536	-2.7172	6.58E-03
PA_moderate	MI	-0.1771	0.0465	-3.811	1.38E-04
PA_moderate	PP	0.0063	0.032	0.1958	8.45E-01
PA_moderate	TG	-0.1837	0.0407	-4.5125	6.41E-06
PA_moderate	Drnk_Wk	-0.0429	0.0477	-0.8994	3.68E-01
PA_moderate	caffein	-0.0604	0.0846	-0.7136	4.75E-01
PA_moderate	BMI	-0.2645	0.0435	-6.0753	1.24E-09
PA_moderate	CAD	-0.1568	0.0489	-3.2099	1.33E-03
PA_moderate	CRP	-0.2513	0.0392	-6.4093	1.46E-10
PA_moderate	DBP	-0.0746	0.0349	-2.1369	3.26E-02
PA_moderate	HDL	0.2179	0.0365	5.9759	2.29E-09
PA_moderate	LDL	-0.0352	0.032	-1.1016	2.71E-01
PA_moderate	SBP	-0.0405	0.032	-1.2658	2.06E-01
PA_moderate	SCZ	0.1128	0.0395	2.8587	4.25E-03
PA_moderate	T2D	-0.2377	0.0369	-6.4403	1.19E-10
PA_moderate	PTST	-0.1301	0.1062	-1.2252	2.21E-01
PA_moderate	eGFR	0.1507	0.0388	3.8794	1.05E-04
PA_moderate	VitD	0.2355	0.0469	5.02	5.17E-07
PA_moderate	HbA1c	-0.0443	0.0518	-0.8545	3.93E-01
PA_moderate	biPol	0.2443	0.0671	3.6413	2.71E-04
PA_moderate	PA_overall	0.8065	0.0361	22.3519	1.16E-110
PA_moderate	PA_walking	0.4697	0.0686	6.8493	7.42E-12
PA_moderate	2hGLUC	-0.0542	0.0891	-0.6083	5.43E-01
PA_moderate	nonHDL	-0.067	0.0347	-1.9321	5.33E-02
PA_moderate	SR_Insomnia	-0.1535	0.0417	-3.6833	2.30E-04
PA_moderate	mood_swings	-0.119	0.0457	-2.603	9.24E-03
PA_moderate	sleep_apnea	-0.0611	0.2339	-0.2613	7.94E-01
PA_moderate	PA_sedentary	-0.6134	0.0443	-13.8613	1.09E-43
PA_moderate	SR_LongSleep	-0.0871	0.07	-1.2439	2.14E-01
PA_moderate	anxiety	0.2873	0.0554	5.1867	2.14E-07
PA_moderate	average_spo2	-0.0672	0.1216	-0.553	5.80E-01
PA_moderate	minimum_spo2	-0.0863	0.1382	-0.6243	5.32E-01
PA_moderate	Anorexia	0.2534	0.0579	4.3772	1.20E-05
PA_moderate	SR_ShortSleep	-0.0729	0.0477	-1.5287	1.26E-01
PA_moderate	SR_chronotype	0.0212	0.0421	0.5029	6.15E-01
PA_moderate	SnoringBMIadj	-0.0186	0.0493	-0.3764	7.07E-01
PA_moderate	WHRadjBMI	-0.0438	0.0582	-0.7521	4.52E-01
PA_moderate	caffein_intake	0.0896	0.0561	1.5969	1.10E-01
PA_moderate	SR_SleepDuration	-0.01	0.0473	-0.2123	8.32E-01
PA_moderate	neurotisicm	-0.0115	0.0449	-0.2565	7.98E-01
PA_moderate	SR_DaytimeNapping	-0.1481	0.0423	-3.4997	4.66E-04
PA_moderate	SR_morning_person	0.0379	0.0439	0.8617	3.89E-01
PA_moderate	relativeAmplitude	-0.5372	0.3212	-1.6725	9.44E-02
PA_moderate	ACC_L5_TIME	-0.0105	0.0727	-0.1444	8.85E-01
PA_moderate	ACC_M10_TIME	0.1165	0.0807	1.4424	1.49E-01
PA_moderate	SR_DaytimeSleepiness	-0.0299	0.0464	-0.6438	5.20E-01
PA_moderate	ACC_SLEEP_DUR	-0.1601	0.0577	-2.7747	5.53E-03
PA_moderate	ACC_SLEEP_EFF	0.1607	0.066	2.4341	1.49E-02
PA_moderate	ACC_SLEEP_MIDP	0.0443	0.0827	0.5358	5.92E-01
PA_moderate	ACC_SLEEP_DUR_SD	-0.2229	0.0975	-2.286	2.23E-02
PA_moderate	ACC_DIURNAL_INACT	-0.5251	0.0571	-9.1917	3.87E-20
PA_moderate	SR_DaytimeSleepiness_adjBMI	0.0295	0.0465	0.6329	5.27E-01
PA_moderate	ACC_N_SLEEP_EPISODES	-0.1484	0.056	-2.6506	8.04E-03
PA_overall	MDD	-0.1388	0.0596	-2.328	1.99E-02
PA_overall	SAD	-0.0217	0.0443	-0.4895	6.24E-01
PA_overall	SWB	0.0682	0.0409	1.6664	9.56E-02
PA_overall	ADHD	-0.052	0.0504	-1.033	3.02E-01
PA_overall	Per90	0.0125	0.0983	0.1272	8.99E-01
PA_overall	CigDay	0.1729	0.0321	5.3943	6.88E-08
PA_overall	FG	0.0281	0.0322	0.8737	3.82E-01
PA_overall	FI	-0.1461	0.0387	-3.7767	1.59E-04
PA_overall	MI	-0.2218	0.0314	-7.0643	1.61E-12
PA_overall	PP	-0.0324	0.0222	-1.4587	1.45E-01
PA_overall	TG	-0.2205	0.0243	-9.0861	1.03E-19
PA_overall	Drnk_Wk	-0.0683	0.0295	-2.3181	2.04E-02
PA_overall	caffein	-0.0486	0.0587	-0.8286	4.07E-01
PA_overall	BMI	-0.2331	0.0261	-8.9373	3.99E-19
PA_overall	CAD	-0.2036	0.0344	-5.9242	3.14E-09
PA_overall	CRP	-0.2916	0.026	-11.2353	2.73E-29
PA_overall	DBP	-0.0941	0.0226	-4.1602	3.18E-05
PA_overall	HDL	0.2206	0.0233	9.4518	3.33E-21
PA_overall	LDL	-0.0676	0.0214	-3.1575	1.59E-03
PA_overall	SBP	-0.0723	0.0213	-3.3943	6.88E-04
PA_overall	SCZ	-0.0023	0.0245	-0.0954	9.24E-01
PA_overall	T2D	-0.2623	0.0208	-12.6223	1.59E-36
PA_overall	PTST	-0.1692	0.0714	-2.3707	1.78E-02
PA_overall	eGFR	0.1282	0.0248	5.1788	2.23E-07
PA_overall	VitD	0.287	0.0309	9.295	1.47E-20
PA_overall	HbA1c	-0.0245	0.0316	-0.7774	4.37E-01
PA_overall	biPol	0.088	0.0458	1.9214	5.47E-02
PA_overall	PA_walking	0.579	0.0341	16.9806	1.14E-64
PA_overall	2hGLUC	-0.1357	0.0523	-2.5958	9.44E-03
PA_overall	nonHDL	-0.1172	0.0216	-5.4191	5.99E-08
PA_overall	PA_moderate	0.8065	0.0361	22.3519	1.16E-110
PA_overall	SR_Insomnia	-0.083	0.0295	-2.8139	4.89E-03
PA_overall	mood_swings	-0.0615	0.03	-2.0476	4.06E-02
PA_overall	sleep_apnea	-0.0522	0.1461	-0.3572	7.21E-01
PA_overall	PA_sedentary	-0.5867	0.0262	-22.382	5.90E-111
PA_overall	SR_LongSleep	-0.1936	0.0418	-4.6346	3.58E-06
PA_overall	anxiety	0.2348	0.0334	7.0381	1.95E-12
PA_overall	average_spo2	-0.0461	0.0768	-0.6003	5.48E-01
PA_overall	minimum_spo2	0.0425	0.089	0.4778	6.33E-01
PA_overall	Anorexia	0.2405	0.039	6.1666	6.98E-10
PA_overall	SR_ShortSleep	-0.0113	0.0346	-0.3259	7.45E-01
PA_overall	SR_chronotype	0.147	0.0276	5.3248	1.01E-07
PA_overall	SnoringBMIadj	-0.0993	0.0308	-3.2268	1.25E-03
PA_overall	WHRadjBMI	-0.0115	0.0326	-0.3518	7.25E-01
PA_overall	caffein_intake	0.0538	0.0355	1.5158	1.30E-01
PA_overall	SR_SleepDuration	-0.0975	0.0338	-2.8846	3.92E-03
PA_overall	neurotisicm	0.0301	0.0278	1.0826	2.79E-01
PA_overall	SR_DaytimeNapping	-0.1271	0.0284	-4.4747	7.65E-06
PA_overall	SR_morning_person	0.1421	0.0283	5.028	4.96E-07
PA_overall	relativeAmplitude	-0.5052	0.252	-2.0046	4.50E-02
PA_overall	ACC_L5_TIME	-0.1459	0.0494	-2.957	3.11E-03
PA_overall	ACC_M10_TIME	-0.1213	0.0528	-2.2983	2.15E-02
PA_overall	SR_DaytimeSleepiness	-0.0829	0.0293	-2.8264	4.71E-03
PA_overall	ACC_SLEEP_DUR	-0.275	0.0358	-7.6898	1.47E-14
PA_overall	ACC_SLEEP_EFF	0.1336	0.0427	3.1288	1.75E-03
PA_overall	ACC_SLEEP_MIDP	-0.0295	0.0505	-0.5849	5.59E-01
PA_overall	ACC_SLEEP_DUR_SD	-0.1413	0.0662	-2.1356	3.27E-02
PA_overall	ACC_DIURNAL_INACT	-0.6002	0.0319	-18.8109	6.15E-79
PA_overall	SR_DaytimeSleepiness_adjBMI	-0.0256	0.0299	-0.8558	3.92E-01
PA_overall	ACC_N_SLEEP_EPISODES	-0.0842	0.0403	-2.0912	3.65E-02
PA_sedentary	MDD	0.0726	0.0647	1.1215	2.62E-01
PA_sedentary	SAD	0.0549	0.0455	1.2068	2.28E-01
PA_sedentary	SWB	-0.0149	0.0574	-0.26	7.95E-01
PA_sedentary	ADHD	-0.0133	0.0518	-0.256	7.98E-01
PA_sedentary	Per90	0.0567	0.1028	0.5515	5.81E-01
PA_sedentary	CigDay	-0.1491	0.0331	-4.5054	6.63E-06
PA_sedentary	FG	-0.0264	0.0349	-0.7564	4.49E-01
PA_sedentary	FI	0.0851	0.045	1.8926	5.84E-02
PA_sedentary	MI	0.1828	0.033	5.5388	3.05E-08
PA_sedentary	PP	-0.0373	0.0249	-1.4992	1.34E-01
PA_sedentary	TG	0.1706	0.0276	6.1727	6.71E-10
PA_sedentary	Drnk_Wk	-0.0424	0.0328	-1.2939	1.96E-01
PA_sedentary	caffein	-0.0942	0.0575	-1.6371	1.02E-01
PA_sedentary	BMI	0.1997	0.0306	6.5286	6.64E-11
PA_sedentary	CAD	0.1382	0.0388	3.5652	3.64E-04
PA_sedentary	CRP	0.2037	0.0271	7.513	5.78E-14
PA_sedentary	DBP	0.0375	0.0268	1.4009	1.61E-01
PA_sedentary	HDL	-0.1624	0.0223	-7.2712	3.56E-13
PA_sedentary	LDL	-0.0019	0.0222	-0.0837	9.33E-01
PA_sedentary	SBP	-0.0035	0.0261	-0.1337	8.94E-01
PA_sedentary	SCZ	-0.1371	0.0261	-5.2455	1.56E-07
PA_sedentary	T2D	0.2038	0.0249	8.1784	2.88E-16
PA_sedentary	PTST	0.1127	0.0718	1.5696	1.17E-01
PA_sedentary	eGFR	-0.0844	0.026	-3.2519	1.15E-03
PA_sedentary	VitD	-0.2908	0.0447	-6.507	7.66E-11
PA_sedentary	HbA1c	0.0023	0.0366	0.0638	9.49E-01
PA_sedentary	biPol	-0.1165	0.0513	-2.2726	2.30E-02
PA_sedentary	PA_overall	-0.5867	0.0262	-22.382	5.90E-111
PA_sedentary	PA_walking	-0.5731	0.0348	-16.4542	7.82E-61
PA_sedentary	2hGLUC	0.0566	0.0528	1.0703	2.84E-01
PA_sedentary	nonHDL	0.0516	0.0239	2.1605	3.07E-02
PA_sedentary	PA_moderate	-0.6134	0.0443	-13.8613	1.09E-43
PA_sedentary	SR_Insomnia	0.044	0.0327	1.3452	1.79E-01
PA_sedentary	mood_swings	-0.1112	0.032	-3.4716	5.17E-04
PA_sedentary	sleep_apnea	-0.1477	0.1665	-0.887	3.75E-01
PA_sedentary	SR_LongSleep	-0.2996	0.0429	-6.9768	3.02E-12
PA_sedentary	anxiety	-0.1952	0.0439	-4.4468	8.72E-06
PA_sedentary	average_spo2	0.0166	0.0853	0.1948	8.46E-01
PA_sedentary	minimum_spo2	-0.0747	0.0883	-0.8465	3.97E-01
PA_sedentary	Anorexia	-0.1921	0.0442	-4.3515	1.35E-05
PA_sedentary	SR_ShortSleep	0.1766	0.0326	5.4246	5.81E-08
PA_sedentary	SR_chronotype	-0.1457	0.0302	-4.8268	1.39E-06
PA_sedentary	SnoringBMIadj	0.0519	0.0374	1.3862	1.66E-01
PA_sedentary	WHRadjBMI	0.0418	0.0379	1.1036	2.70E-01
PA_sedentary	caffein_intake	-0.1421	0.0436	-3.2588	1.12E-03
PA_sedentary	SR_SleepDuration	-0.249	0.0294	-8.4561	2.76E-17
PA_sedentary	neurotisicm	-0.1271	0.0301	-4.2206	2.44E-05
PA_sedentary	SR_DaytimeNapping	-0.0536	0.0305	-1.7577	7.88E-02
PA_sedentary	SR_morning_person	-0.1328	0.0312	-4.2508	2.13E-05
PA_sedentary	relativeAmplitude	0.6097	0.2937	2.076	3.79E-02
PA_sedentary	ACC_L5_TIME	0.1725	0.0493	3.4987	4.68E-04
PA_sedentary	ACC_M10_TIME	0.0986	0.0523	1.8859	5.93E-02
PA_sedentary	SR_DaytimeSleepiness	0.0075	0.0319	0.2341	8.15E-01
PA_sedentary	ACC_SLEEP_DUR	-0.3913	0.039	-10.0307	1.12E-23
PA_sedentary	ACC_SLEEP_EFF	-0.376	0.04	-9.4114	4.89E-21
PA_sedentary	ACC_SLEEP_MIDP	0.2739	0.0534	5.133	2.85E-07
PA_sedentary	ACC_SLEEP_DUR_SD	0.2355	0.0896	2.6282	8.58E-03
PA_sedentary	ACC_DIURNAL_INACT	0.1062	0.0456	2.3282	1.99E-02
PA_sedentary	SR_DaytimeSleepiness_adjBMI	-0.039	0.0318	-1.2267	2.20E-01
PA_sedentary	ACC_N_SLEEP_EPISODES	-0.0386	0.0391	-0.9872	3.24E-01
PA_walking	MDD	-0.2059	0.0728	-2.8281	4.68E-03
PA_walking	SAD	-0.0775	0.06	-1.2921	1.96E-01
PA_walking	SWB	0.0031	0.0634	0.0494	9.61E-01
PA_walking	ADHD	-0.0426	0.0561	-0.7583	4.48E-01
PA_walking	Per90	0.0966	0.1256	0.7691	4.42E-01
PA_walking	CigDay	0.0887	0.039	2.2749	2.29E-02
PA_walking	FG	0.0623	0.0446	1.3948	1.63E-01
PA_walking	FI	-0.1575	0.0484	-3.2503	1.15E-03
PA_walking	MI	-0.2215	0.0383	-5.7788	7.52E-09
PA_walking	PP	-0.0526	0.0276	-1.9072	5.65E-02
PA_walking	TG	-0.1798	0.0285	-6.3086	2.81E-10
PA_walking	Drnk_Wk	-0.061	0.0341	-1.7913	7.32E-02
PA_walking	caffein	-0.0719	0.0608	-1.1816	2.37E-01
PA_walking	BMI	-0.0424	0.0309	-1.3706	1.71E-01
PA_walking	CAD	-0.172	0.0432	-3.9793	6.91E-05
PA_walking	CRP	-0.1888	0.0303	-6.2227	4.89E-10
PA_walking	DBP	-0.1141	0.0321	-3.5522	3.82E-04
PA_walking	HDL	0.1409	0.0266	5.3004	1.16E-07
PA_walking	LDL	-0.049	0.025	-1.9615	4.98E-02
PA_walking	SBP	-0.0961	0.0292	-3.2893	1.00E-03
PA_walking	SCZ	0.1158	0.0324	3.5767	3.48E-04
PA_walking	T2D	-0.1169	0.0273	-4.2837	1.84E-05
PA_walking	PTST	-0.0487	0.083	-0.5869	5.57E-01
PA_walking	eGFR	0.1191	0.0297	4.0033	6.25E-05
PA_walking	VitD	0.2469	0.0392	6.2917	3.14E-10
PA_walking	HbA1c	0.0237	0.042	0.5629	5.74E-01
PA_walking	biPol	0.1374	0.0559	2.4573	1.40E-02
PA_walking	PA_overall	0.579	0.0341	16.9806	1.14E-64
PA_walking	2hGLUC	-0.1267	0.0582	-2.1765	2.95E-02
PA_walking	nonHDL	-0.0865	0.0262	-3.301	9.64E-04
PA_walking	PA_moderate	0.4697	0.0686	6.8493	7.42E-12
PA_walking	SR_Insomnia	-0.0636	0.0352	-1.8085	7.05E-02
PA_walking	mood_swings	0.0104	0.0379	0.274	7.84E-01
PA_walking	sleep_apnea	0.1452	0.195	0.7447	4.56E-01
PA_walking	PA_sedentary	-0.5731	0.0348	-16.4542	7.82E-61
PA_walking	SR_LongSleep	-0.1201	0.0498	-2.413	1.58E-02
PA_walking	anxiety	0.1205	0.0469	2.5675	1.02E-02
PA_walking	average_spo2	-0.0724	0.0871	-0.8314	4.06E-01
PA_walking	minimum_spo2	0.0413	0.1055	0.3912	6.96E-01
PA_walking	Anorexia	0.1488	0.05	2.9743	2.94E-03
PA_walking	SR_ShortSleep	-0.0211	0.0389	-0.5413	5.88E-01
PA_walking	SR_chronotype	0.1811	0.0334	5.423	5.86E-08
PA_walking	SnoringBMIadj	-0.1121	0.0381	-2.9435	3.25E-03
PA_walking	WHRadjBMI	-0.0318	0.0399	-0.7957	4.26E-01
PA_walking	caffein_intake	0.0215	0.0437	0.4926	6.22E-01
PA_walking	SR_SleepDuration	-0.0513	0.0332	-1.5473	1.22E-01
PA_walking	neurotisicm	0.068	0.0342	1.9852	4.71E-02
PA_walking	SR_DaytimeNapping	-0.0612	0.0364	-1.6811	9.27E-02
PA_walking	SR_morning_person	0.1771	0.0345	5.13	2.90E-07
PA_walking	relativeAmplitude	-0.2312	0.1973	-1.1718	2.41E-01
PA_walking	ACC_L5_TIME	-0.1228	0.0527	-2.3286	1.99E-02
PA_walking	ACC_M10_TIME	-0.1336	0.0674	-1.9814	4.75E-02
PA_walking	SR_DaytimeSleepiness	-0.0491	0.0392	-1.2505	2.11E-01
PA_walking	ACC_SLEEP_DUR	-0.2141	0.0523	-4.0913	4.29E-05
PA_walking	ACC_SLEEP_EFF	0.1196	0.0537	2.2275	2.59E-02
PA_walking	ACC_SLEEP_MIDP	-0.0519	0.0608	-0.8541	3.93E-01
PA_walking	ACC_SLEEP_DUR_SD	-0.0484	0.0877	-0.5521	5.81E-01
PA_walking	ACC_DIURNAL_INACT	-0.4801	0.0464	-10.3371	4.79E-25
PA_walking	SR_DaytimeSleepiness_adjBMI	-0.0261	0.0397	-0.6565	5.11E-01
PA_walking	ACC_N_SLEEP_EPISODES	-0.0853	0.0467	-1.8279	6.76E-02
Per90	MDD	-0.0817	0.1577	-0.5178	6.05E-01
Per90	SAD	-0.0547	0.1239	-0.4414	6.59E-01
Per90	SWB	0.1371	0.1399	0.9803	3.27E-01
Per90	ADHD	-0.0199	0.1347	-0.1478	8.83E-01
Per90	CigDay	-0.0527	0.0814	-0.6471	5.18E-01
Per90	FG	-0.0332	0.0878	-0.3779	7.06E-01
Per90	FI	0.0371	0.1059	0.3501	7.26E-01
Per90	MI	0.0698	0.0765	0.9124	3.62E-01
Per90	PP	-0.1516	0.0719	-2.1081	3.50E-02
Per90	TG	-0.0222	0.0593	-0.3749	7.08E-01
Per90	Drnk_Wk	0.0977	0.0724	1.3501	1.77E-01
Per90	caffein	0.0295	0.1384	0.2134	8.31E-01
Per90	BMI	-0.0542	0.0724	-0.7477	4.55E-01
Per90	CAD	0.0109	0.0906	0.1202	9.04E-01
Per90	CRP	0.0131	0.0756	0.1738	8.62E-01
Per90	DBP	-0.0493	0.0652	-0.7562	4.50E-01
Per90	HDL	-0.0172	0.0568	-0.303	7.62E-01
Per90	LDL	0.1058	0.0693	1.5266	1.27E-01
Per90	SBP	-0.1255	0.0684	-1.8357	6.64E-02
Per90	SCZ	0.08	0.0654	1.2235	2.21E-01
Per90	T2D	0.0709	0.0576	1.23	2.19E-01
Per90	PTST	0.1831	0.1521	1.2036	2.29E-01
Per90	eGFR	0.0289	0.0635	0.4548	6.49E-01
Per90	VitD	-0.012	0.0849	-0.1413	8.88E-01
Per90	HbA1c	0.1716	0.1028	1.6694	9.50E-02
Per90	biPol	-0.0416	0.1198	-0.3475	7.28E-01
Per90	PA_overall	0.0125	0.0983	0.1272	8.99E-01
Per90	PA_walking	0.0966	0.1256	0.7691	4.42E-01
Per90	2hGLUC	0.1644	0.148	1.1111	2.67E-01
Per90	nonHDL	0.1035	0.0758	1.3647	1.72E-01
Per90	PA_moderate	-0.0326	0.1663	-0.1958	8.45E-01
Per90	SR_Insomnia	0.0335	0.0799	0.4188	6.75E-01
Per90	mood_swings	-0.1023	0.0801	-1.2781	2.01E-01
Per90	sleep_apnea	2.2604	0.8613	2.6245	8.68E-03
Per90	PA_sedentary	0.0567	0.1028	0.5515	5.81E-01
Per90	SR_LongSleep	0.1309	0.1136	1.1517	2.49E-01
Per90	anxiety	-0.0856	0.0982	-0.8715	3.83E-01
Per90	average_spo2	-0.7423	0.1334	-5.5631	2.65E-08
Per90	minimum_spo2	-0.892	0.1203	-7.4139	1.23E-13
Per90	Anorexia	-0.0302	0.1007	-0.2998	7.64E-01
Per90	SR_ShortSleep	-0.0552	0.0892	-0.6192	5.36E-01
Per90	SR_chronotype	0.0229	0.0718	0.319	7.50E-01
Per90	SnoringBMIadj	0.4548	0.1187	3.8333	1.26E-04
Per90	WHRadjBMI	0.2552	0.1103	2.3135	2.07E-02
Per90	caffein_intake	0.0239	0.0989	0.2412	8.09E-01
Per90	SR_SleepDuration	0.1204	0.0803	1.4992	1.34E-01
Per90	neurotisicm	-0.0349	0.0696	-0.5019	6.16E-01
Per90	SR_DaytimeNapping	-0.0131	0.0668	-0.1959	8.45E-01
Per90	SR_morning_person	0.0653	0.0751	0.8684	3.85E-01
Per90	relativeAmplitude	0.6567	0.5598	1.1731	2.41E-01
Per90	ACC_L5_TIME	0.0139	0.1381	0.1008	9.20E-01
Per90	ACC_M10_TIME	-0.1577	0.1391	-1.1341	2.57E-01
Per90	SR_DaytimeSleepiness	0.042	0.078	0.5381	5.91E-01
Per90	ACC_SLEEP_DUR	-0.1173	0.1083	-1.0828	2.79E-01
Per90	ACC_SLEEP_EFF	-0.2383	0.1304	-1.8269	6.77E-02
Per90	ACC_SLEEP_MIDP	-0.0051	0.1442	-0.0353	9.72E-01
Per90	ACC_SLEEP_DUR_SD	0.3307	0.2214	1.4937	1.35E-01
Per90	ACC_DIURNAL_INACT	0.0922	0.1105	0.8339	4.04E-01
Per90	SR_DaytimeSleepiness_adjBMI	0.0477	0.0781	0.6106	5.41E-01
Per90	ACC_N_SLEEP_EPISODES	0.0429	0.1	0.4287	6.68E-01
SAD	MDD	0.0694	0.078	0.89	0.3735
SAD	SWB	0.0666	0.0635	1.0493	0.2941
SAD	ADHD	0.0012	0.0516	0.0242	0.9807
SAD	Per90	-0.0547	0.1239	-0.4414	0.6589
SAD	CigDay	-0.0219	0.0363	-0.6034	0.5463
SAD	FG	0.0388	0.0429	0.9047	0.3656
SAD	FI	-0.0073	0.0473	-0.1555	0.8764
SAD	MI	-0.0268	0.0375	-0.7133	0.4756
SAD	PP	-0.0456	0.0272	-1.6748	0.094
SAD	TG	0.035	0.0267	1.3111	0.1898
SAD	Drnk_Wk	0.0043	0.0354	0.121	0.9037
SAD	caffein	0.0514	0.0592	0.8677	0.3855
SAD	BMI	-0.042	0.0334	-1.2579	0.2084
SAD	CAD	-0.0125	0.0425	-0.2948	0.7682
SAD	CRP	0.0124	0.0276	0.4472	0.6548
SAD	DBP	-0.0331	0.0264	-1.2517	0.2107
SAD	HDL	-0.0315	0.0289	-1.0924	0.2746
SAD	LDL	0.0066	0.0227	0.2891	0.7725
SAD	SBP	-0.0495	0.027	-1.8318	0.067
SAD	SCZ	0.0442	0.0319	1.3875	0.1653
SAD	T2D	0.0018	0.0269	0.0671	0.9465
SAD	PTST	0.0487	0.0805	0.6042	0.5457
SAD	eGFR	0.0351	0.0301	1.1666	0.2434
SAD	VitD	-0.0293	0.0338	-0.8675	0.3856
SAD	HbA1c	0.0401	0.04	1.0042	0.3153
SAD	biPol	0.1914	0.0797	2.4007	0.0164
SAD	PA_overall	-0.0217	0.0443	-0.4895	0.6245
SAD	PA_walking	-0.0775	0.06	-1.2921	0.1963
SAD	2hGLUC	0.0705	0.0714	0.9872	0.3235
SAD	nonHDL	0.0036	0.0242	0.1473	0.8829
SAD	PA_moderate	-0.134	0.0814	-1.646	0.0998
SAD	SR_Insomnia	-0.0427	0.0375	-1.1388	0.2548
SAD	mood_swings	-0.0298	0.0378	-0.7886	0.4304
SAD	sleep_apnea	-0.0023	0.1748	-0.0132	0.9894
SAD	PA_sedentary	0.0549	0.0455	1.2068	0.2275
SAD	SR_LongSleep	0.0136	0.0452	0.3004	0.7639
SAD	anxiety	-0.0332	0.0431	-0.7717	0.4403
SAD	average_spo2	-0.0874	0.0915	-0.9549	0.3396
SAD	minimum_spo2	0.0693	0.1083	0.64	0.5222
SAD	Anorexia	0.0245	0.0409	0.5982	0.5497
SAD	SR_ShortSleep	-0.0542	0.0429	-1.2625	0.2068
SAD	SR_chronotype	0.0623	0.0351	1.7727	0.0763
SAD	SnoringBMIadj	0.0068	0.0379	0.178	0.8587
SAD	WHRadjBMI	0.0289	0.0435	0.6649	0.5061
SAD	caffein_intake	-0.0144	0.0442	-0.3245	0.7456
SAD	SR_SleepDuration	0.0418	0.0374	1.1173	0.2639
SAD	neurotisicm	-0.0076	0.032	-0.2365	0.813
SAD	SR_DaytimeNapping	0.0261	0.0341	0.7669	0.4431
SAD	SR_morning_person	0.0642	0.0372	1.7235	0.0848
SAD	relativeAmplitude	-0.1668	0.1956	-0.8524	0.394
SAD	ACC_L5_TIME	-0.0055	0.0531	-0.1035	0.9176
SAD	ACC_M10_TIME	0.0185	0.061	0.3027	0.7621
SAD	SR_DaytimeSleepiness	0.0198	0.0397	0.499	0.6178
SAD	ACC_SLEEP_DUR	-0.0223	0.0427	-0.5209	0.6024
SAD	ACC_SLEEP_EFF	-0.0205	0.0497	-0.4125	0.68
SAD	ACC_SLEEP_MIDP	0.0338	0.0589	0.5742	0.5658
SAD	ACC_SLEEP_DUR_SD	0.0178	0.0875	0.2036	0.8387
SAD	ACC_DIURNAL_INACT	-0.0186	0.0455	-0.4095	0.6822
SAD	SR_DaytimeSleepiness_adjBMI	0.0244	0.0398	0.6141	0.5392
SAD	ACC_N_SLEEP_EPISODES	6e-04	0.0392	0.0151	0.988
SR_DaytimeNapping	MDD	0.2536	0.0442	5.7366	9.66E-09
SR_DaytimeNapping	SAD	0.0261	0.0341	0.7669	4.43E-01
SR_DaytimeNapping	SWB	-0.1537	0.0372	-4.1298	3.63E-05
SR_DaytimeNapping	ADHD	0.2361	0.0389	6.0685	1.29E-09
SR_DaytimeNapping	Per90	-0.0131	0.0668	-0.1959	8.45E-01
SR_DaytimeNapping	CigDay	-0.2115	0.0247	-8.5545	1.18E-17
SR_DaytimeNapping	FG	0.0662	0.0263	2.5212	1.17E-02
SR_DaytimeNapping	FI	0.1048	0.0265	3.9469	7.92E-05
SR_DaytimeNapping	MI	0.1098	0.0223	4.9328	8.11E-07
SR_DaytimeNapping	PP	0.03	0.0186	1.6133	1.07E-01
SR_DaytimeNapping	TG	0.1751	0.0175	10.0246	1.19E-23
SR_DaytimeNapping	Drnk_Wk	0.0034	0.0263	0.1301	8.96E-01
SR_DaytimeNapping	caffein	-0.0394	0.0395	-0.9976	3.19E-01
SR_DaytimeNapping	BMI	0.1301	0.02	6.5023	7.91E-11
SR_DaytimeNapping	CAD	0.1086	0.0259	4.1925	2.76E-05
SR_DaytimeNapping	CRP	0.1312	0.0225	5.8283	5.60E-09
SR_DaytimeNapping	DBP	0.0671	0.0167	4.0156	5.93E-05
SR_DaytimeNapping	HDL	-0.1719	0.019	-9.0473	1.47E-19
SR_DaytimeNapping	LDL	0.0199	0.016	1.2442	2.13E-01
SR_DaytimeNapping	SBP	0.0602	0.0177	3.401	6.71E-04
SR_DaytimeNapping	SCZ	0.1597	0.0185	8.6325	6.00E-18
SR_DaytimeNapping	T2D	0.1865	0.0169	11.0327	2.66E-28
SR_DaytimeNapping	PTST	0.2544	0.0555	4.5858	4.52E-06
SR_DaytimeNapping	eGFR	-0.0531	0.0166	-3.1993	1.38E-03
SR_DaytimeNapping	VitD	-0.1083	0.0191	-5.6685	1.44E-08
SR_DaytimeNapping	HbA1c	0.054	0.0232	2.3297	1.98E-02
SR_DaytimeNapping	biPol	0.0732	0.0326	2.2466	2.47E-02
SR_DaytimeNapping	PA_overall	-0.1271	0.0284	-4.4747	7.65E-06
SR_DaytimeNapping	PA_walking	-0.0612	0.0364	-1.6811	9.27E-02
SR_DaytimeNapping	2hGLUC	0.0718	0.0385	1.8634	6.24E-02
SR_DaytimeNapping	nonHDL	0.0665	0.0157	4.2298	2.34E-05
SR_DaytimeNapping	PA_moderate	-0.1481	0.0423	-3.4997	4.66E-04
SR_DaytimeNapping	SR_Insomnia	0.2025	0.0234	8.6483	5.23E-18
SR_DaytimeNapping	mood_swings	0.2168	0.0241	8.9831	2.63E-19
SR_DaytimeNapping	sleep_apnea	-0.0213	0.1062	-0.2009	8.41E-01
SR_DaytimeNapping	PA_sedentary	-0.0536	0.0305	-1.7577	7.88E-02
SR_DaytimeNapping	SR_LongSleep	0.417	0.0266	15.6772	2.17E-55
SR_DaytimeNapping	anxiety	-0.0581	0.0257	-2.2627	2.37E-02
SR_DaytimeNapping	average_spo2	-0.0146	0.0531	-0.2756	7.83E-01
SR_DaytimeNapping	minimum_spo2	-0.001	0.0623	-0.0162	9.87E-01
SR_DaytimeNapping	Anorexia	-0.1562	0.0321	-4.8682	1.13E-06
SR_DaytimeNapping	SR_ShortSleep	-0.0274	0.0278	-0.9858	3.24E-01
SR_DaytimeNapping	SR_chronotype	0.1215	0.0222	5.4829	4.18E-08
SR_DaytimeNapping	SnoringBMIadj	0.0993	0.0239	4.1494	3.33E-05
SR_DaytimeNapping	WHRadjBMI	0.1087	0.0271	4.0148	5.95E-05
SR_DaytimeNapping	caffein_intake	0.0058	0.0291	0.1989	8.42E-01
SR_DaytimeNapping	SR_SleepDuration	0.2043	0.022	9.3039	1.35E-20
SR_DaytimeNapping	neurotisicm	0.2	0.0235	8.5176	1.63E-17
SR_DaytimeNapping	SR_morning_person	0.1041	0.0222	4.698	2.63E-06
SR_DaytimeNapping	relativeAmplitude	0.2542	0.1619	1.5706	1.16E-01
SR_DaytimeNapping	ACC_L5_TIME	-0.1313	0.0373	-3.5177	4.35E-04
SR_DaytimeNapping	ACC_M10_TIME	-0.1218	0.0392	-3.1073	1.89E-03
SR_DaytimeNapping	SR_DaytimeSleepiness	0.705	0.0182	38.6699	0.00E+00
SR_DaytimeNapping	ACC_SLEEP_DUR	-0.0056	0.0296	-0.1891	8.50E-01
SR_DaytimeNapping	ACC_SLEEP_EFF	-0.1296	0.0319	-4.0643	4.82E-05
SR_DaytimeNapping	ACC_SLEEP_MIDP	-0.1585	0.037	-4.2836	1.84E-05
SR_DaytimeNapping	ACC_SLEEP_DUR_SD	0.1469	0.0556	2.6422	8.24E-03
SR_DaytimeNapping	ACC_DIURNAL_INACT	0.3522	0.0281	12.5219	5.67E-36
SR_DaytimeNapping	SR_DaytimeSleepiness_adjBMI	0.6851	0.0183	37.4669	3.19E-307
SR_DaytimeNapping	ACC_N_SLEEP_EPISODES	0.0354	0.0302	1.1738	2.40E-01
SR_DaytimeSleepiness	MDD	0.1737	0.0497	3.4933	4.77E-04
SR_DaytimeSleepiness	SAD	0.0198	0.0397	0.499	6.18E-01
SR_DaytimeSleepiness	SWB	-0.2108	0.0385	-5.4692	4.52E-08
SR_DaytimeSleepiness	ADHD	0.1434	0.0407	3.5265	4.21E-04
SR_DaytimeSleepiness	Per90	0.042	0.078	0.5381	5.91E-01
SR_DaytimeSleepiness	CigDay	-0.0767	0.0296	-2.5909	9.57E-03
SR_DaytimeSleepiness	FG	-0.0162	0.0303	-0.5344	5.93E-01
SR_DaytimeSleepiness	FI	0.0409	0.0325	1.2558	2.09E-01
SR_DaytimeSleepiness	MI	0.128	0.0258	4.9671	6.80E-07
SR_DaytimeSleepiness	PP	-0.0029	0.0202	-0.1418	8.87E-01
SR_DaytimeSleepiness	TG	0.099	0.0197	5.0251	5.03E-07
SR_DaytimeSleepiness	Drnk_Wk	0.0325	0.0273	1.1874	2.35E-01
SR_DaytimeSleepiness	caffein	-0.0284	0.0442	-0.6421	5.21E-01
SR_DaytimeSleepiness	BMI	0.1496	0.0222	6.7295	1.70E-11
SR_DaytimeSleepiness	CAD	0.1521	0.0289	5.2611	1.43E-07
SR_DaytimeSleepiness	CRP	0.0985	0.0232	4.2432	2.20E-05
SR_DaytimeSleepiness	DBP	0.0091	0.0202	0.4521	6.51E-01
SR_DaytimeSleepiness	HDL	-0.1112	0.0182	-6.1121	9.83E-10
SR_DaytimeSleepiness	LDL	-0.0127	0.0169	-0.7502	4.53E-01
SR_DaytimeSleepiness	SBP	0.0057	0.0198	0.2869	7.74E-01
SR_DaytimeSleepiness	SCZ	0.0813	0.0213	3.8263	1.30E-04
SR_DaytimeSleepiness	T2D	0.1382	0.0179	7.7293	1.08E-14
SR_DaytimeSleepiness	PTST	0.19	0.0584	3.2525	1.14E-03
SR_DaytimeSleepiness	eGFR	-0.0287	0.0206	-1.3967	1.63E-01
SR_DaytimeSleepiness	VitD	-0.1068	0.0217	-4.9188	8.71E-07
SR_DaytimeSleepiness	HbA1c	0.059	0.0262	2.2538	2.42E-02
SR_DaytimeSleepiness	biPol	0.0462	0.0354	1.3047	1.92E-01
SR_DaytimeSleepiness	PA_overall	-0.0829	0.0293	-2.8264	4.71E-03
SR_DaytimeSleepiness	PA_walking	-0.0491	0.0392	-1.2505	2.11E-01
SR_DaytimeSleepiness	2hGLUC	-0.0068	0.0462	-0.1475	8.83E-01
SR_DaytimeSleepiness	nonHDL	0.0279	0.0179	1.5561	1.20E-01
SR_DaytimeSleepiness	PA_moderate	-0.0299	0.0464	-0.6438	5.20E-01
SR_DaytimeSleepiness	SR_Insomnia	0.2352	0.0258	9.1165	7.76E-20
SR_DaytimeSleepiness	mood_swings	0.2374	0.0251	9.474	2.69E-21
SR_DaytimeSleepiness	sleep_apnea	0.0202	0.1151	0.1758	8.60E-01
SR_DaytimeSleepiness	PA_sedentary	0.0075	0.0319	0.2341	8.15E-01
SR_DaytimeSleepiness	SR_LongSleep	0.1348	0.032	4.2088	2.57E-05
SR_DaytimeSleepiness	anxiety	-0.0383	0.0285	-1.3441	1.79E-01
SR_DaytimeSleepiness	average_spo2	-0.0619	0.0595	-1.0395	2.99E-01
SR_DaytimeSleepiness	minimum_spo2	-0.0395	0.0688	-0.574	5.66E-01
SR_DaytimeSleepiness	Anorexia	-0.0629	0.0348	-1.8081	7.06E-02
SR_DaytimeSleepiness	SR_ShortSleep	0.1481	0.0297	4.984	6.23E-07
SR_DaytimeSleepiness	SR_chronotype	0.0597	0.0209	2.8619	4.21E-03
SR_DaytimeSleepiness	SnoringBMIadj	0.1783	0.0275	6.4849	8.88E-11
SR_DaytimeSleepiness	WHRadjBMI	0.0088	0.0308	0.2861	7.75E-01
SR_DaytimeSleepiness	caffein_intake	-0.0117	0.0342	-0.3433	7.31E-01
SR_DaytimeSleepiness	SR_SleepDuration	-0.0618	0.0231	-2.6692	7.60E-03
SR_DaytimeSleepiness	neurotisicm	0.2585	0.0237	10.8949	1.22E-27
SR_DaytimeSleepiness	SR_DaytimeNapping	0.705	0.0182	38.6699	0.00E+00
SR_DaytimeSleepiness	SR_morning_person	0.0623	0.0219	2.8459	4.43E-03
SR_DaytimeSleepiness	relativeAmplitude	0.1563	0.1538	1.0164	3.09E-01
SR_DaytimeSleepiness	ACC_L5_TIME	-0.0509	0.037	-1.3742	1.69E-01
SR_DaytimeSleepiness	ACC_M10_TIME	-0.1333	0.043	-3.1021	1.92E-03
SR_DaytimeSleepiness	ACC_SLEEP_DUR	-0.056	0.0335	-1.6745	9.40E-02
SR_DaytimeSleepiness	ACC_SLEEP_EFF	-0.223	0.0366	-6.0952	1.09E-09
SR_DaytimeSleepiness	ACC_SLEEP_MIDP	-0.1225	0.0401	-3.0546	2.25E-03
SR_DaytimeSleepiness	ACC_SLEEP_DUR_SD	0.1488	0.0655	2.2734	2.30E-02
SR_DaytimeSleepiness	ACC_DIURNAL_INACT	0.2441	0.0308	7.9177	2.42E-15
SR_DaytimeSleepiness	SR_DaytimeSleepiness_adjBMI	0.9843	0.0008	1165.21	0.00E+00
SR_DaytimeSleepiness	ACC_N_SLEEP_EPISODES	0.0566	0.0341	1.6579	9.73E-02
SR_DaytimeSleepiness_adjBMI	MDD	0.1359	0.0501	2.7121	6.68E-03
SR_DaytimeSleepiness_adjBMI	SAD	0.0244	0.0398	0.6141	5.39E-01
SR_DaytimeSleepiness_adjBMI	SWB	-0.2106	0.0382	-5.509	3.61E-08
SR_DaytimeSleepiness_adjBMI	ADHD	0.0739	0.0409	1.8079	7.06E-02
SR_DaytimeSleepiness_adjBMI	Per90	0.0477	0.0781	0.6106	5.41E-01
SR_DaytimeSleepiness_adjBMI	CigDay	-0.0137	0.028	-0.4901	6.24E-01
SR_DaytimeSleepiness_adjBMI	FG	-0.0028	0.0301	-0.0927	9.26E-01
SR_DaytimeSleepiness_adjBMI	FI	0.0606	0.0329	1.8408	6.57E-02
SR_DaytimeSleepiness_adjBMI	MI	0.0677	0.0255	2.6522	8.00E-03
SR_DaytimeSleepiness_adjBMI	PP	3e-04	0.0198	0.0174	9.86E-01
SR_DaytimeSleepiness_adjBMI	TG	0.0465	0.0206	2.2557	2.41E-02
SR_DaytimeSleepiness_adjBMI	Drnk_Wk	0.0283	0.027	1.0503	2.94E-01
SR_DaytimeSleepiness_adjBMI	caffein	-0.0525	0.0443	-1.1852	2.36E-01
SR_DaytimeSleepiness_adjBMI	BMI	-0.0189	0.0229	-0.8247	4.10E-01
SR_DaytimeSleepiness_adjBMI	CAD	0.0999	0.0287	3.475	5.11E-04
SR_DaytimeSleepiness_adjBMI	CRP	0.0054	0.0225	0.2395	8.11E-01
SR_DaytimeSleepiness_adjBMI	DBP	0.0168	0.0203	0.8301	4.07E-01
SR_DaytimeSleepiness_adjBMI	HDL	-0.0467	0.0176	-2.6577	7.87E-03
SR_DaytimeSleepiness_adjBMI	LDL	-0.0178	0.0174	-1.0179	3.09E-01
SR_DaytimeSleepiness_adjBMI	SBP	0.0117	0.0197	0.5935	5.53E-01
SR_DaytimeSleepiness_adjBMI	SCZ	0.1031	0.0214	4.8082	1.52E-06
SR_DaytimeSleepiness_adjBMI	T2D	0.0379	0.0184	2.0569	3.97E-02
SR_DaytimeSleepiness_adjBMI	PTST	0.1352	0.058	2.3321	1.97E-02
SR_DaytimeSleepiness_adjBMI	eGFR	-0.0168	0.0211	-0.794	4.27E-01
SR_DaytimeSleepiness_adjBMI	VitD	-0.0784	0.0213	-3.6814	2.32E-04
SR_DaytimeSleepiness_adjBMI	HbA1c	0.0266	0.0268	0.9919	3.21E-01
SR_DaytimeSleepiness_adjBMI	biPol	0.0698	0.0351	1.9916	4.64E-02
SR_DaytimeSleepiness_adjBMI	PA_overall	-0.0256	0.0299	-0.8558	3.92E-01
SR_DaytimeSleepiness_adjBMI	PA_walking	-0.0261	0.0397	-0.6565	5.11E-01
SR_DaytimeSleepiness_adjBMI	2hGLUC	0.0145	0.0464	0.3131	7.54E-01
SR_DaytimeSleepiness_adjBMI	nonHDL	0.0077	0.0186	0.4126	6.80E-01
SR_DaytimeSleepiness_adjBMI	PA_moderate	0.0295	0.0465	0.6329	5.27E-01
SR_DaytimeSleepiness_adjBMI	SR_Insomnia	0.2046	0.0263	7.7857	6.93E-15
SR_DaytimeSleepiness_adjBMI	mood_swings	0.2004	0.0251	7.9893	1.36E-15
SR_DaytimeSleepiness_adjBMI	sleep_apnea	0.0328	0.1143	0.2867	7.74E-01
SR_DaytimeSleepiness_adjBMI	PA_sedentary	-0.039	0.0318	-1.2267	2.20E-01
SR_DaytimeSleepiness_adjBMI	SR_LongSleep	0.1054	0.0326	3.2369	1.21E-03
SR_DaytimeSleepiness_adjBMI	anxiety	0.0462	0.0286	1.6143	1.06E-01
SR_DaytimeSleepiness_adjBMI	average_spo2	-0.0742	0.0594	-1.2478	2.12E-01
SR_DaytimeSleepiness_adjBMI	minimum_spo2	-0.043	0.0686	-0.627	5.31E-01
SR_DaytimeSleepiness_adjBMI	Anorexia	-0.0098	0.0345	-0.283	7.77E-01
SR_DaytimeSleepiness_adjBMI	SR_ShortSleep	0.1045	0.03	3.4859	4.90E-04
SR_DaytimeSleepiness_adjBMI	SR_chronotype	0.0546	0.0207	2.6425	8.23E-03
SR_DaytimeSleepiness_adjBMI	SnoringBMIadj	0.1798	0.0275	6.5439	5.99E-11
SR_DaytimeSleepiness_adjBMI	WHRadjBMI	0.0074	0.0313	0.2378	8.12E-01
SR_DaytimeSleepiness_adjBMI	caffein_intake	0.0604	0.0345	1.7483	8.04E-02
SR_DaytimeSleepiness_adjBMI	SR_SleepDuration	-0.0446	0.0234	-1.9078	5.64E-02
SR_DaytimeSleepiness_adjBMI	neurotisicm	0.257	0.0239	10.732	7.20E-27
SR_DaytimeSleepiness_adjBMI	SR_DaytimeNapping	0.6851	0.0183	37.4669	3.19E-307
SR_DaytimeSleepiness_adjBMI	SR_morning_person	0.0597	0.0216	2.7598	5.78E-03
SR_DaytimeSleepiness_adjBMI	relativeAmplitude	0.056	0.1403	0.3994	6.90E-01
SR_DaytimeSleepiness_adjBMI	ACC_L5_TIME	-0.0539	0.0367	-1.4715	1.41E-01
SR_DaytimeSleepiness_adjBMI	ACC_M10_TIME	-0.1239	0.0426	-2.9081	3.64E-03
SR_DaytimeSleepiness_adjBMI	SR_DaytimeSleepiness	0.9843	0.0008	1165.21	0.00E+00
SR_DaytimeSleepiness_adjBMI	ACC_SLEEP_DUR	-0.0514	0.0339	-1.5168	1.29E-01
SR_DaytimeSleepiness_adjBMI	ACC_SLEEP_EFF	-0.1976	0.0367	-5.3828	7.33E-08
SR_DaytimeSleepiness_adjBMI	ACC_SLEEP_MIDP	-0.1188	0.0393	-3.0249	2.49E-03
SR_DaytimeSleepiness_adjBMI	ACC_SLEEP_DUR_SD	0.1068	0.0646	1.6536	9.82E-02
SR_DaytimeSleepiness_adjBMI	ACC_DIURNAL_INACT	0.2056	0.0311	6.6098	3.85E-11
SR_DaytimeSleepiness_adjBMI	ACC_N_SLEEP_EPISODES	0.0415	0.0344	1.2038	2.29E-01
SR_Insomnia	MDD	0.381	0.0485	7.8625	3.77E-15
SR_Insomnia	SAD	-0.0427	0.0375	-1.1388	2.55E-01
SR_Insomnia	SWB	-0.3621	0.0367	-9.8663	5.83E-23
SR_Insomnia	ADHD	0.3215	0.0381	8.4321	3.39E-17
SR_Insomnia	Per90	0.0335	0.0799	0.4188	6.75E-01
SR_Insomnia	CigDay	-0.2258	0.0301	-7.5024	6.27E-14
SR_Insomnia	FG	0.0991	0.0269	3.6843	2.29E-04
SR_Insomnia	FI	0.0903	0.0308	2.926	3.43E-03
SR_Insomnia	MI	0.225	0.0251	8.9744	2.85E-19
SR_Insomnia	PP	0.0405	0.0201	2.0172	4.37E-02
SR_Insomnia	TG	0.1393	0.0195	7.1446	9.03E-13
SR_Insomnia	Drnk_Wk	-0.0903	0.0226	-4.0038	6.23E-05
SR_Insomnia	caffein	0.1318	0.0406	3.2491	1.16E-03
SR_Insomnia	BMI	0.0884	0.0268	3.3	9.67E-04
SR_Insomnia	CAD	0.1669	0.0264	6.317	2.67E-10
SR_Insomnia	CRP	0.1279	0.0234	5.4734	4.41E-08
SR_Insomnia	DBP	0.065	0.0185	3.5179	4.35E-04
SR_Insomnia	HDL	-0.1036	0.0204	-5.0808	3.76E-07
SR_Insomnia	LDL	0.0514	0.0158	3.2557	1.13E-03
SR_Insomnia	SBP	0.0633	0.02	3.159	1.58E-03
SR_Insomnia	SCZ	0.0145	0.0211	0.686	4.93E-01
SR_Insomnia	T2D	0.1811	0.0208	8.7212	2.75E-18
SR_Insomnia	PTST	0.4473	0.0586	7.6315	2.32E-14
SR_Insomnia	eGFR	0.0019	0.019	0.1023	9.19E-01
SR_Insomnia	VitD	-0.0192	0.0222	-0.8668	3.86E-01
SR_Insomnia	HbA1c	0.087	0.0272	3.2019	1.37E-03
SR_Insomnia	biPol	-0.0787	0.035	-2.2469	2.46E-02
SR_Insomnia	PA_overall	-0.083	0.0295	-2.8139	4.89E-03
SR_Insomnia	PA_walking	-0.0636	0.0352	-1.8085	7.05E-02
SR_Insomnia	2hGLUC	0.0507	0.0435	1.1676	2.43E-01
SR_Insomnia	nonHDL	0.0771	0.0162	4.7721	1.82E-06
SR_Insomnia	PA_moderate	-0.1535	0.0417	-3.6833	2.30E-04
SR_Insomnia	mood_swings	0.4413	0.0218	20.213	7.53E-91
SR_Insomnia	sleep_apnea	-0.0207	0.1189	-0.1743	8.62E-01
SR_Insomnia	PA_sedentary	0.044	0.0327	1.3452	1.79E-01
SR_Insomnia	SR_LongSleep	0.0069	0.0316	0.2195	8.26E-01
SR_Insomnia	anxiety	0.0046	0.0315	0.1452	8.85E-01
SR_Insomnia	average_spo2	-0.1113	0.0634	-1.7569	7.89E-02
SR_Insomnia	minimum_spo2	-0.1475	0.075	-1.967	4.92E-02
SR_Insomnia	Anorexia	0.0665	0.0324	2.0536	4.00E-02
SR_Insomnia	SR_ShortSleep	0.6523	0.0199	32.838	1.69E-236
SR_Insomnia	SR_chronotype	0.0249	0.0213	1.1719	2.41E-01
SR_Insomnia	SnoringBMIadj	-0.0607	0.0265	-2.2905	2.20E-02
SR_Insomnia	WHRadjBMI	0.1115	0.0283	3.9418	8.09E-05
SR_Insomnia	caffein_intake	-0.0776	0.0322	-2.4084	1.60E-02
SR_Insomnia	SR_SleepDuration	-0.512	0.0187	-27.4104	2.06E-165
SR_Insomnia	neurotisicm	0.4373	0.0198	22.048	9.98E-108
SR_Insomnia	SR_DaytimeNapping	0.2025	0.0234	8.6483	5.23E-18
SR_Insomnia	SR_morning_person	0.0272	0.0218	1.2492	2.12E-01
SR_Insomnia	relativeAmplitude	0.5335	0.2502	2.1321	3.30E-02
SR_Insomnia	ACC_L5_TIME	0.0191	0.0377	0.5051	6.13E-01
SR_Insomnia	ACC_M10_TIME	-0.1076	0.0451	-2.3834	1.72E-02
SR_Insomnia	SR_DaytimeSleepiness	0.2352	0.0258	9.1165	7.76E-20
SR_Insomnia	ACC_SLEEP_DUR	-0.12	0.0276	-4.3413	1.42E-05
SR_Insomnia	ACC_SLEEP_EFF	-0.1888	0.0348	-5.4249	5.80E-08
SR_Insomnia	ACC_SLEEP_MIDP	-0.064	0.0444	-1.4429	1.49E-01
SR_Insomnia	ACC_SLEEP_DUR_SD	0.2503	0.0663	3.7779	1.58E-04
SR_Insomnia	ACC_DIURNAL_INACT	0.1449	0.032	4.5267	5.99E-06
SR_Insomnia	SR_DaytimeSleepiness_adjBMI	0.2046	0.0263	7.7857	6.93E-15
SR_Insomnia	ACC_N_SLEEP_EPISODES	0.1091	0.0275	3.9657	7.32E-05
SR_LongSleep	MDD	0.2964	0.0648	4.5757	4.75E-06
SR_LongSleep	SAD	0.0136	0.0452	0.3004	7.64E-01
SR_LongSleep	SWB	-0.0936	0.0582	-1.6085	1.08E-01
SR_LongSleep	ADHD	0.3704	0.0514	7.204	5.85E-13
SR_LongSleep	Per90	0.1309	0.1136	1.1517	2.49E-01
SR_LongSleep	CigDay	-0.2633	0.0404	-6.5131	7.36E-11
SR_LongSleep	FG	0.0431	0.0398	1.0825	2.79E-01
SR_LongSleep	FI	0.1019	0.0523	1.9487	5.13E-02
SR_LongSleep	MI	0.2068	0.0328	6.3103	2.79E-10
SR_LongSleep	PP	0.0508	0.0257	1.9785	4.79E-02
SR_LongSleep	TG	0.171	0.0308	5.5551	2.77E-08
SR_LongSleep	Drnk_Wk	-0.0173	0.0314	-0.5512	5.81E-01
SR_LongSleep	caffein	0.0665	0.0543	1.2248	2.21E-01
SR_LongSleep	BMI	0.0864	0.0302	2.8588	4.25E-03
SR_LongSleep	CAD	0.2002	0.0404	4.9594	7.07E-07
SR_LongSleep	CRP	0.2015	0.0315	6.3879	1.68E-10
SR_LongSleep	DBP	0.0971	0.0271	3.5802	3.43E-04
SR_LongSleep	HDL	-0.1204	0.026	-4.6382	3.51E-06
SR_LongSleep	LDL	0.0901	0.0264	3.4085	6.53E-04
SR_LongSleep	SBP	0.0889	0.0277	3.2113	1.32E-03
SR_LongSleep	SCZ	0.2943	0.0288	10.238	1.34E-24
SR_LongSleep	T2D	0.184	0.029	6.3379	2.33E-10
SR_LongSleep	PTST	0.3153	0.0777	4.0573	4.97E-05
SR_LongSleep	eGFR	-0.0834	0.027	-3.0939	1.98E-03
SR_LongSleep	VitD	-0.0414	0.0284	-1.461	1.44E-01
SR_LongSleep	HbA1c	0.0884	0.0362	2.4423	1.46E-02
SR_LongSleep	biPol	0.1412	0.0498	2.8337	4.60E-03
SR_LongSleep	PA_overall	-0.1936	0.0418	-4.6346	3.58E-06
SR_LongSleep	PA_walking	-0.1201	0.0498	-2.413	1.58E-02
SR_LongSleep	2hGLUC	0.2093	0.0588	3.5588	3.73E-04
SR_LongSleep	nonHDL	0.0852	0.0248	3.4396	5.83E-04
SR_LongSleep	PA_moderate	-0.0871	0.07	-1.2439	2.14E-01
SR_LongSleep	SR_Insomnia	0.0069	0.0316	0.2195	8.26E-01
SR_LongSleep	mood_swings	0.2781	0.037	7.5247	5.29E-14
SR_LongSleep	sleep_apnea	-0.0001	0.1698	-0.0006	1.00E+00
SR_LongSleep	PA_sedentary	-0.2996	0.0429	-6.9768	3.02E-12
SR_LongSleep	anxiety	-0.1427	0.0414	-3.4471	5.67E-04
SR_LongSleep	average_spo2	-0.2108	0.0883	-2.3886	1.69E-02
SR_LongSleep	minimum_spo2	-0.1653	0.0949	-1.7423	8.15E-02
SR_LongSleep	Anorexia	-0.1139	0.0394	-2.8923	3.82E-03
SR_LongSleep	SR_ShortSleep	-0.2805	0.0392	-7.1518	8.56E-13
SR_LongSleep	SR_chronotype	-0.0232	0.0286	-0.8118	4.17E-01
SR_LongSleep	SnoringBMIadj	0.0609	0.0365	1.6669	9.55E-02
SR_LongSleep	WHRadjBMI	0.2221	0.0423	5.2486	1.53E-07
SR_LongSleep	caffein_intake	-0.1022	0.0453	-2.2585	2.39E-02
SR_LongSleep	SR_SleepDuration	0.6924	0.0226	30.6797	1.06E-206
SR_LongSleep	neurotisicm	0.1657	0.0314	5.2835	1.27E-07
SR_LongSleep	SR_DaytimeNapping	0.417	0.0266	15.6772	2.17E-55
SR_LongSleep	SR_morning_person	-0.0498	0.0295	-1.6899	9.11E-02
SR_LongSleep	relativeAmplitude	-0.0817	0.1994	-0.4095	6.82E-01
SR_LongSleep	ACC_L5_TIME	0.0127	0.0499	0.2543	7.99E-01
SR_LongSleep	ACC_M10_TIME	0.0931	0.0576	1.6151	1.06E-01
SR_LongSleep	SR_DaytimeSleepiness	0.1348	0.032	4.2088	2.57E-05
SR_LongSleep	ACC_SLEEP_DUR	0.4159	0.0399	10.4292	1.82E-25
SR_LongSleep	ACC_SLEEP_EFF	0.1879	0.0469	4.0085	6.11E-05
SR_LongSleep	ACC_SLEEP_MIDP	-0.0119	0.0597	-0.1992	8.42E-01
SR_LongSleep	ACC_SLEEP_DUR_SD	0.0751	0.0803	0.9362	3.49E-01
SR_LongSleep	ACC_DIURNAL_INACT	0.2949	0.0421	7.0029	2.51E-12
SR_LongSleep	SR_DaytimeSleepiness_adjBMI	0.1054	0.0326	3.2369	1.21E-03
SR_LongSleep	ACC_N_SLEEP_EPISODES	0.2149	0.0381	5.6441	1.66E-08
SR_ShortSleep	MDD	0.2529	0.0541	4.6762	2.92E-06
SR_ShortSleep	SAD	-0.0542	0.0429	-1.2625	2.07E-01
SR_ShortSleep	SWB	-0.2787	0.0395	-7.0619	1.64E-12
SR_ShortSleep	ADHD	0.3444	0.0408	8.4349	3.31E-17
SR_ShortSleep	Per90	-0.0552	0.0892	-0.6192	5.36E-01
SR_ShortSleep	CigDay	-0.2228	0.0313	-7.1213	1.07E-12
SR_ShortSleep	FG	0.1139	0.0305	3.733	1.89E-04
SR_ShortSleep	FI	0.0105	0.0296	0.3549	7.23E-01
SR_ShortSleep	MI	0.2095	0.0258	8.108	5.15E-16
SR_ShortSleep	PP	0.008	0.021	0.3835	7.01E-01
SR_ShortSleep	TG	0.1398	0.0191	7.3364	2.19E-13
SR_ShortSleep	Drnk_Wk	-0.0153	0.025	-0.615	5.39E-01
SR_ShortSleep	caffein	0.0208	0.0455	0.4561	6.48E-01
SR_ShortSleep	BMI	0.1581	0.0249	6.3579	2.05E-10
SR_ShortSleep	CAD	0.1566	0.0305	5.1383	2.77E-07
SR_ShortSleep	CRP	0.1624	0.0288	5.6402	1.70E-08
SR_ShortSleep	DBP	0.037	0.02	1.8475	6.47E-02
SR_ShortSleep	HDL	-0.0943	0.0184	-5.1319	2.87E-07
SR_ShortSleep	LDL	0.0309	0.0182	1.6959	8.99E-02
SR_ShortSleep	SBP	0.0261	0.0206	1.2675	2.05E-01
SR_ShortSleep	SCZ	-0.0401	0.0234	-1.7186	8.57E-02
SR_ShortSleep	T2D	0.1785	0.0205	8.7241	2.68E-18
SR_ShortSleep	PTST	0.4794	0.0668	7.1817	6.88E-13
SR_ShortSleep	eGFR	0.0237	0.0209	1.1301	2.58E-01
SR_ShortSleep	VitD	-0.0511	0.0249	-2.0489	4.05E-02
SR_ShortSleep	HbA1c	0.1502	0.0266	5.6452	1.65E-08
SR_ShortSleep	biPol	-0.1518	0.0367	-4.1345	3.56E-05
SR_ShortSleep	PA_overall	-0.0113	0.0346	-0.3259	7.45E-01
SR_ShortSleep	PA_walking	-0.0211	0.0389	-0.5413	5.88E-01
SR_ShortSleep	2hGLUC	0.0464	0.0456	1.019	3.08E-01
SR_ShortSleep	nonHDL	0.0576	0.0187	3.0815	2.06E-03
SR_ShortSleep	PA_moderate	-0.0729	0.0477	-1.5287	1.26E-01
SR_ShortSleep	SR_Insomnia	0.6523	0.0199	32.838	1.69E-236
SR_ShortSleep	mood_swings	0.3163	0.0251	12.5825	2.64E-36
SR_ShortSleep	sleep_apnea	-0.023	0.1268	-0.1816	8.56E-01
SR_ShortSleep	PA_sedentary	0.1766	0.0326	5.4246	5.81E-08
SR_ShortSleep	SR_LongSleep	-0.2805	0.0392	-7.1518	8.56E-13
SR_ShortSleep	anxiety	-0.1308	0.0326	-4.016	5.92E-05
SR_ShortSleep	average_spo2	-0.0582	0.0661	-0.8808	3.78E-01
SR_ShortSleep	minimum_spo2	0.0585	0.0806	0.7258	4.68E-01
SR_ShortSleep	Anorexia	0.0754	0.0331	2.2805	2.26E-02
SR_ShortSleep	SR_chronotype	0.0878	0.024	3.6652	2.47E-04
SR_ShortSleep	SnoringBMIadj	-0.0785	0.0263	-2.9827	2.86E-03
SR_ShortSleep	WHRadjBMI	0.1034	0.0321	3.2243	1.26E-03
SR_ShortSleep	caffein_intake	-0.2117	0.0314	-6.7414	1.57E-11
SR_ShortSleep	SR_SleepDuration	-0.89	0.0089	-99.8027	0.00E+00
SR_ShortSleep	neurotisicm	0.24	0.0231	10.3739	3.26E-25
SR_ShortSleep	SR_DaytimeNapping	-0.0274	0.0278	-0.9858	3.24E-01
SR_ShortSleep	SR_morning_person	0.0693	0.0245	2.8311	4.64E-03
SR_ShortSleep	relativeAmplitude	0.6628	0.2961	2.2385	2.52E-02
SR_ShortSleep	ACC_L5_TIME	0.0214	0.0405	0.5295	5.96E-01
SR_ShortSleep	ACC_M10_TIME	-0.1189	0.0451	-2.6377	8.35E-03
SR_ShortSleep	SR_DaytimeSleepiness	0.1481	0.0297	4.984	6.23E-07
SR_ShortSleep	ACC_SLEEP_DUR	-0.3136	0.0325	-9.6617	4.39E-22
SR_ShortSleep	ACC_SLEEP_EFF	-0.3564	0.0394	-9.0342	1.65E-19
SR_ShortSleep	ACC_SLEEP_MIDP	-0.0467	0.0443	-1.0526	2.93E-01
SR_ShortSleep	ACC_SLEEP_DUR_SD	0.4101	0.065	6.3072	2.84E-10
SR_ShortSleep	ACC_DIURNAL_INACT	0.043	0.0375	1.1468	2.51E-01
SR_ShortSleep	SR_DaytimeSleepiness_adjBMI	0.1045	0.03	3.4859	4.90E-04
SR_ShortSleep	ACC_N_SLEEP_EPISODES	-0.025	0.0321	-0.777	4.37E-01
SR_SleepDuration	MDD	-0.0567	0.0455	-1.2467	2.13E-01
SR_SleepDuration	SAD	0.0418	0.0374	1.1173	2.64E-01
SR_SleepDuration	SWB	0.1677	0.0396	4.2307	2.33E-05
SR_SleepDuration	ADHD	-0.0806	0.0399	-2.0179	4.36E-02
SR_SleepDuration	Per90	0.1204	0.0803	1.4992	1.34E-01
SR_SleepDuration	CigDay	0.0511	0.027	1.8901	5.87E-02
SR_SleepDuration	FG	-0.0664	0.0252	-2.6342	8.43E-03
SR_SleepDuration	FI	0.0302	0.0325	0.9269	3.54E-01
SR_SleepDuration	MI	-0.0761	0.0244	-3.1191	1.81E-03
SR_SleepDuration	PP	0.0172	0.0201	0.8527	3.94E-01
SR_SleepDuration	TG	-0.0281	0.0179	-1.5709	1.16E-01
SR_SleepDuration	Drnk_Wk	0.0074	0.0231	0.3183	7.50E-01
SR_SleepDuration	caffein	-0.0303	0.0426	-0.7114	4.77E-01
SR_SleepDuration	BMI	-0.0742	0.0231	-3.2129	1.31E-03
SR_SleepDuration	CAD	-0.0362	0.0292	-1.2396	2.15E-01
SR_SleepDuration	CRP	-0.0329	0.0215	-1.5314	1.26E-01
SR_SleepDuration	DBP	0.0229	0.0193	1.1861	2.36E-01
SR_SleepDuration	HDL	0.0089	0.0161	0.5547	5.79E-01
SR_SleepDuration	LDL	0.0151	0.0181	0.8361	4.03E-01
SR_SleepDuration	SBP	0.0246	0.0203	1.2082	2.27E-01
SR_SleepDuration	SCZ	0.1598	0.0195	8.1787	2.87E-16
SR_SleepDuration	T2D	-0.0488	0.0194	-2.5202	1.17E-02
SR_SleepDuration	PTST	-0.2189	0.0529	-4.1382	3.50E-05
SR_SleepDuration	eGFR	-0.0592	0.0196	-3.0206	2.52E-03
SR_SleepDuration	VitD	0.0296	0.0221	1.3424	1.79E-01
SR_SleepDuration	HbA1c	-0.0801	0.0235	-3.4091	6.52E-04
SR_SleepDuration	biPol	0.1707	0.0324	5.2687	1.37E-07
SR_SleepDuration	PA_overall	-0.0975	0.0338	-2.8846	3.92E-03
SR_SleepDuration	PA_walking	-0.0513	0.0332	-1.5473	1.22E-01
SR_SleepDuration	2hGLUC	0.0584	0.0392	1.4879	1.37E-01
SR_SleepDuration	nonHDL	-0.0036	0.0181	-0.1971	8.44E-01
SR_SleepDuration	PA_moderate	-0.01	0.0473	-0.2123	8.32E-01
SR_SleepDuration	SR_Insomnia	-0.512	0.0187	-27.4104	2.06E-165
SR_SleepDuration	mood_swings	-0.1137	0.0252	-4.5112	6.45E-06
SR_SleepDuration	sleep_apnea	0.03	0.11	0.2723	7.85E-01
SR_SleepDuration	PA_sedentary	-0.249	0.0294	-8.4561	2.76E-17
SR_SleepDuration	SR_LongSleep	0.6924	0.0226	30.6797	1.06E-206
SR_SleepDuration	anxiety	0.0276	0.0294	0.9386	3.48E-01
SR_SleepDuration	average_spo2	-0.081	0.0599	-1.3529	1.76E-01
SR_SleepDuration	minimum_spo2	-0.1325	0.0676	-1.9587	5.01E-02
SR_SleepDuration	Anorexia	-0.1147	0.0296	-3.8705	1.09E-04
SR_SleepDuration	SR_ShortSleep	-0.89	0.0089	-99.8027	0.00E+00
SR_SleepDuration	SR_chronotype	-0.0663	0.0217	-3.0627	2.19E-03
SR_SleepDuration	SnoringBMIadj	0.0934	0.0258	3.615	3.00E-04
SR_SleepDuration	WHRadjBMI	0.0229	0.0288	0.7947	4.27E-01
SR_SleepDuration	caffein_intake	0.1183	0.0309	3.8236	1.32E-04
SR_SleepDuration	neurotisicm	-0.113	0.0219	-5.1492	2.62E-07
SR_SleepDuration	SR_DaytimeNapping	0.2043	0.022	9.3039	1.35E-20
SR_SleepDuration	SR_morning_person	-0.0681	0.0217	-3.1352	1.72E-03
SR_SleepDuration	relativeAmplitude	-0.4352	0.2158	-2.0169	4.37E-02
SR_SleepDuration	ACC_L5_TIME	-0.0185	0.0361	-0.5134	6.08E-01
SR_SleepDuration	ACC_M10_TIME	0.1349	0.0401	3.3653	7.65E-04
SR_SleepDuration	SR_DaytimeSleepiness	-0.0618	0.0231	-2.6692	7.60E-03
SR_SleepDuration	ACC_SLEEP_DUR	0.4318	0.0282	15.32	5.62E-53
SR_SleepDuration	ACC_SLEEP_EFF	0.35	0.0347	10.09	6.11E-24
SR_SleepDuration	ACC_SLEEP_MIDP	0.0376	0.0438	0.8578	3.91E-01
SR_SleepDuration	ACC_SLEEP_DUR_SD	-0.2576	0.0566	-4.5492	5.39E-06
SR_SleepDuration	ACC_DIURNAL_INACT	0.1021	0.0333	3.064	2.18E-03
SR_SleepDuration	SR_DaytimeSleepiness_adjBMI	-0.0446	0.0234	-1.9078	5.64E-02
SR_SleepDuration	ACC_N_SLEEP_EPISODES	0.1232	0.0296	4.1567	3.23E-05
SR_chronotype	MDD	-0.0381	0.0397	-0.9601	3.37E-01
SR_chronotype	SAD	0.0623	0.0351	1.7727	7.63E-02
SR_chronotype	SWB	0.1485	0.0321	4.6214	3.81E-06
SR_chronotype	ADHD	0.0288	0.0336	0.8562	3.92E-01
SR_chronotype	Per90	0.0229	0.0718	0.319	7.50E-01
SR_chronotype	CigDay	-0.008	0.0247	-0.3234	7.46E-01
SR_chronotype	FG	-0.0026	0.0252	-0.1045	9.17E-01
SR_chronotype	FI	-0.0821	0.0285	-2.884	3.93E-03
SR_chronotype	MI	-0.0019	0.019	-0.0983	9.22E-01
SR_chronotype	PP	0.0157	0.0164	0.9559	3.39E-01
SR_chronotype	TG	-0.0027	0.0162	-0.1663	8.68E-01
SR_chronotype	Drnk_Wk	0.1199	0.0197	6.0799	1.20E-09
SR_chronotype	caffein	0.0773	0.0353	2.1918	2.84E-02
SR_chronotype	BMI	0.0436	0.0213	2.0441	4.09E-02
SR_chronotype	CAD	0.0088	0.0224	0.3937	6.94E-01
SR_chronotype	CRP	0.0058	0.0168	0.3449	7.30E-01
SR_chronotype	DBP	0.0103	0.0159	0.6466	5.18E-01
SR_chronotype	HDL	-0.0106	0.0136	-0.7841	4.33E-01
SR_chronotype	LDL	-0.0018	0.0157	-0.1166	9.07E-01
SR_chronotype	SBP	0.0171	0.0162	1.0552	2.91E-01
SR_chronotype	SCZ	-0.1084	0.0175	-6.1815	6.35E-10
SR_chronotype	T2D	0.0653	0.0156	4.1877	2.82E-05
SR_chronotype	PTST	0.0267	0.045	0.594	5.52E-01
SR_chronotype	eGFR	0.0186	0.0145	1.2808	2.00E-01
SR_chronotype	VitD	0.1451	0.0217	6.6824	2.35E-11
SR_chronotype	HbA1c	0.0325	0.023	1.4142	1.57E-01
SR_chronotype	biPol	-0.0531	0.0302	-1.7587	7.86E-02
SR_chronotype	PA_overall	0.147	0.0276	5.3248	1.01E-07
SR_chronotype	PA_walking	0.1811	0.0334	5.423	5.86E-08
SR_chronotype	2hGLUC	0.0028	0.0323	0.0864	9.31E-01
SR_chronotype	nonHDL	0.0052	0.0147	0.3552	7.22E-01
SR_chronotype	PA_moderate	0.0212	0.0421	0.5029	6.15E-01
SR_chronotype	SR_Insomnia	0.0249	0.0213	1.1719	2.41E-01
SR_chronotype	mood_swings	0.0271	0.0242	1.1179	2.64E-01
SR_chronotype	sleep_apnea	-0.0238	0.0938	-0.2539	8.00E-01
SR_chronotype	PA_sedentary	-0.1457	0.0302	-4.8268	1.39E-06
SR_chronotype	SR_LongSleep	-0.0232	0.0286	-0.8118	4.17E-01
SR_chronotype	anxiety	0.0364	0.0254	1.4332	1.52E-01
SR_chronotype	average_spo2	-0.0892	0.0568	-1.571	1.16E-01
SR_chronotype	minimum_spo2	-0.0016	0.0579	-0.0274	9.78E-01
SR_chronotype	Anorexia	0.0035	0.028	0.1241	9.01E-01
SR_chronotype	SR_ShortSleep	0.0878	0.024	3.6652	2.47E-04
SR_chronotype	SnoringBMIadj	-0.0036	0.0217	-0.1676	8.67E-01
SR_chronotype	WHRadjBMI	0.0055	0.0237	0.2326	8.16E-01
SR_chronotype	caffein_intake	-0.0007	0.0247	-0.0289	9.77E-01
SR_chronotype	SR_SleepDuration	-0.0663	0.0217	-3.0627	2.19E-03
SR_chronotype	neurotisicm	-0.001	0.0211	-0.048	9.62E-01
SR_chronotype	SR_DaytimeNapping	0.1215	0.0222	5.4829	4.18E-08
SR_chronotype	SR_morning_person	0.9941	0.001	977.347	0.00E+00
SR_chronotype	relativeAmplitude	-0.4401	0.2351	-1.8724	6.12E-02
SR_chronotype	ACC_L5_TIME	0.9109	0.0348	26.164	6.84E-151
SR_chronotype	ACC_M10_TIME	0.8714	0.0422	20.6426	1.14E-94
SR_chronotype	SR_DaytimeSleepiness	0.0597	0.0209	2.8619	4.21E-03
SR_chronotype	ACC_SLEEP_DUR	-0.0191	0.0299	-0.6401	5.22E-01
SR_chronotype	ACC_SLEEP_EFF	0.0994	0.0302	3.2952	9.84E-04
SR_chronotype	ACC_SLEEP_MIDP	0.8464	0.0417	20.296	1.39E-91
SR_chronotype	ACC_SLEEP_DUR_SD	-0.1763	0.0487	-3.6226	2.92E-04
SR_chronotype	ACC_DIURNAL_INACT	-0.0438	0.0298	-1.4683	1.42E-01
SR_chronotype	SR_DaytimeSleepiness_adjBMI	0.0546	0.0207	2.6425	8.23E-03
SR_chronotype	ACC_N_SLEEP_EPISODES	0.0299	0.0227	1.316	1.88E-01
SR_morning_person	MDD	-0.0653	0.0407	-1.6042	1.09E-01
SR_morning_person	SAD	0.0642	0.0372	1.7235	8.48E-02
SR_morning_person	SWB	0.1672	0.0327	5.1081	3.25E-07
SR_morning_person	ADHD	-0.0213	0.0349	-0.6106	5.41E-01
SR_morning_person	Per90	0.0653	0.0751	0.8684	3.85E-01
SR_morning_person	CigDay	0.0134	0.0253	0.5292	5.97E-01
SR_morning_person	FG	-0.0031	0.0266	-0.1168	9.07E-01
SR_morning_person	FI	-0.0832	0.0302	-2.7555	5.86E-03
SR_morning_person	MI	-0.0171	0.02	-0.8546	3.93E-01
SR_morning_person	PP	0.024	0.017	1.4083	1.59E-01
SR_morning_person	TG	-0.0121	0.0167	-0.7234	4.69E-01
SR_morning_person	Drnk_Wk	0.1294	0.0203	6.3628	1.98E-10
SR_morning_person	caffein	0.0731	0.0367	1.9903	4.66E-02
SR_morning_person	BMI	0.0286	0.0227	1.2607	2.07E-01
SR_morning_person	CAD	-0.0089	0.0237	-0.3768	7.06E-01
SR_morning_person	CRP	-0.0077	0.0175	-0.441	6.59E-01
SR_morning_person	DBP	0.0093	0.0166	0.5574	5.77E-01
SR_morning_person	HDL	-0.009	0.014	-0.643	5.20E-01
SR_morning_person	LDL	-0.0048	0.0158	-0.3048	7.61E-01
SR_morning_person	SBP	0.0221	0.0168	1.3131	1.89E-01
SR_morning_person	SCZ	-0.1381	0.0181	-7.613	2.68E-14
SR_morning_person	T2D	0.0541	0.0157	3.4477	5.65E-04
SR_morning_person	PTST	0.0022	0.0477	0.0457	9.64E-01
SR_morning_person	eGFR	0.0195	0.0152	1.2849	1.99E-01
SR_morning_person	VitD	0.1302	0.0217	6.0024	1.94E-09
SR_morning_person	HbA1c	0.0302	0.0237	1.2735	2.03E-01
SR_morning_person	biPol	-0.0709	0.0305	-2.3243	2.01E-02
SR_morning_person	PA_overall	0.1421	0.0283	5.028	4.96E-07
SR_morning_person	PA_walking	0.1771	0.0345	5.13	2.90E-07
SR_morning_person	2hGLUC	2e-04	0.0331	0.0049	9.96E-01
SR_morning_person	nonHDL	0.0021	0.0149	0.1438	8.86E-01
SR_morning_person	PA_moderate	0.0379	0.0439	0.8617	3.89E-01
SR_morning_person	SR_Insomnia	0.0272	0.0218	1.2492	2.12E-01
SR_morning_person	mood_swings	-0.0005	0.0251	-0.0193	9.85E-01
SR_morning_person	sleep_apnea	-0.034	0.1001	-0.3398	7.34E-01
SR_morning_person	PA_sedentary	-0.1328	0.0312	-4.2508	2.13E-05
SR_morning_person	SR_LongSleep	-0.0498	0.0295	-1.6899	9.11E-02
SR_morning_person	anxiety	0.0456	0.0266	1.7103	8.72E-02
SR_morning_person	average_spo2	-0.106	0.0608	-1.7417	8.16E-02
SR_morning_person	minimum_spo2	-0.0255	0.0616	-0.4129	6.80E-01
SR_morning_person	Anorexia	-0.0014	0.0283	-0.0511	9.59E-01
SR_morning_person	SR_ShortSleep	0.0693	0.0245	2.8311	4.64E-03
SR_morning_person	SR_chronotype	0.9941	0.001	977.347	0.00E+00
SR_morning_person	SnoringBMIadj	-0.0011	0.0228	-0.0474	9.62E-01
SR_morning_person	WHRadjBMI	-0.006	0.0249	-0.2424	8.08E-01
SR_morning_person	caffein_intake	0.0225	0.0258	0.871	3.84E-01
SR_morning_person	SR_SleepDuration	-0.0681	0.0217	-3.1352	1.72E-03
SR_morning_person	neurotisicm	-0.0116	0.0225	-0.5183	6.04E-01
SR_morning_person	SR_DaytimeNapping	0.1041	0.0222	4.698	2.63E-06
SR_morning_person	relativeAmplitude	-0.4692	0.2453	-1.9124	5.58E-02
SR_morning_person	ACC_L5_TIME	0.9238	0.0351	26.3243	1.01E-152
SR_morning_person	ACC_M10_TIME	0.865	0.0427	20.2794	1.96E-91
SR_morning_person	SR_DaytimeSleepiness	0.0623	0.0219	2.8459	4.43E-03
SR_morning_person	ACC_SLEEP_DUR	-0.0275	0.0312	-0.8824	3.78E-01
SR_morning_person	ACC_SLEEP_EFF	0.0908	0.0312	2.9084	3.63E-03
SR_morning_person	ACC_SLEEP_MIDP	0.8537	0.0431	19.8127	2.32E-87
SR_morning_person	ACC_SLEEP_DUR_SD	-0.2074	0.0513	-4.0437	5.26E-05
SR_morning_person	ACC_DIURNAL_INACT	-0.0541	0.0301	-1.7957	7.25E-02
SR_morning_person	SR_DaytimeSleepiness_adjBMI	0.0597	0.0216	2.7598	5.78E-03
SR_morning_person	ACC_N_SLEEP_EPISODES	0.0267	0.0246	1.0867	2.77E-01
SWB	MDD	-0.4402	0.0776	-5.6699	1.43E-08
SWB	SAD	0.0666	0.0635	1.0493	2.94E-01
SWB	ADHD	-0.293	0.057	-5.141	2.73E-07
SWB	Per90	0.1371	0.1399	0.9803	3.27E-01
SWB	CigDay	0.132	0.0457	2.8868	3.89E-03
SWB	FG	-0.0154	0.042	-0.3656	7.15E-01
SWB	FI	-0.0355	0.0539	-0.6587	5.10E-01
SWB	MI	-0.0541	0.0395	-1.372	1.70E-01
SWB	PP	0.0462	0.032	1.443	1.49E-01
SWB	TG	-0.0812	0.0324	-2.5033	1.23E-02
SWB	Drnk_Wk	0.1144	0.0398	2.8757	4.03E-03
SWB	caffein	0.1338	0.065	2.0572	3.97E-02
SWB	BMI	-0.0117	0.0336	-0.3488	7.27E-01
SWB	CAD	0.0108	0.0447	0.242	8.09E-01
SWB	CRP	-0.0188	0.0304	-0.6162	5.38E-01
SWB	DBP	0.0019	0.0292	0.0638	9.49E-01
SWB	HDL	-0.005	0.0288	-0.1734	8.62E-01
SWB	LDL	-0.0273	0.0269	-1.0149	3.10E-01
SWB	SBP	0.0254	0.0317	0.801	4.23E-01
SWB	SCZ	-0.3085	0.0326	-9.4732	2.71E-21
SWB	T2D	-0.0214	0.0306	-0.6982	4.85E-01
SWB	PTST	-0.6594	0.0936	-7.0469	1.83E-12
SWB	eGFR	-0.0203	0.0335	-0.6039	5.46E-01
SWB	VitD	0.0635	0.0316	2.0108	4.43E-02
SWB	HbA1c	0.0834	0.0411	2.0306	4.23E-02
SWB	biPol	-0.1085	0.0605	-1.7913	7.32E-02
SWB	PA_overall	0.0682	0.0409	1.6664	9.56E-02
SWB	PA_walking	0.0031	0.0634	0.0494	9.61E-01
SWB	2hGLUC	-0.122	0.0731	-1.6691	9.51E-02
SWB	nonHDL	-0.0459	0.0264	-1.737	8.24E-02
SWB	PA_moderate	0.0943	0.0636	1.4828	1.38E-01
SWB	SR_Insomnia	-0.3621	0.0367	-9.8663	5.83E-23
SWB	mood_swings	-0.5756	0.0397	-14.5012	1.19E-47
SWB	sleep_apnea	0.1397	0.1764	0.7919	4.28E-01
SWB	PA_sedentary	-0.0149	0.0574	-0.26	7.95E-01
SWB	SR_LongSleep	-0.0936	0.0582	-1.6085	1.08E-01
SWB	anxiety	-0.1592	0.0523	-3.0447	2.33E-03
SWB	average_spo2	-0.0898	0.102	-0.8805	3.79E-01
SWB	minimum_spo2	-0.1104	0.1154	-0.9565	3.39E-01
SWB	Anorexia	-0.2336	0.0497	-4.7038	2.55E-06
SWB	SR_ShortSleep	-0.2787	0.0395	-7.0619	1.64E-12
SWB	SR_chronotype	0.1485	0.0321	4.6214	3.81E-06
SWB	SnoringBMIadj	0.0925	0.0417	2.2202	2.64E-02
SWB	WHRadjBMI	-0.0869	0.0482	-1.8048	7.11E-02
SWB	caffein_intake	-0.0048	0.0425	-0.1133	9.10E-01
SWB	SR_SleepDuration	0.1677	0.0396	4.2307	2.33E-05
SWB	neurotisicm	-0.6482	0.037	-17.5251	9.21E-69
SWB	SR_DaytimeNapping	-0.1537	0.0372	-4.1298	3.63E-05
SWB	SR_morning_person	0.1672	0.0327	5.1081	3.25E-07
SWB	relativeAmplitude	-0.4165	0.2343	-1.7778	7.54E-02
SWB	ACC_L5_TIME	-0.0517	0.0583	-0.8858	3.76E-01
SWB	ACC_M10_TIME	-0.0365	0.0659	-0.554	5.80E-01
SWB	SR_DaytimeSleepiness	-0.2108	0.0385	-5.4692	4.52E-08
SWB	ACC_SLEEP_DUR	0.0296	0.0529	0.5603	5.75E-01
SWB	ACC_SLEEP_EFF	0.1699	0.0569	2.9835	2.85E-03
SWB	ACC_SLEEP_MIDP	-0.0347	0.0746	-0.4652	6.42E-01
SWB	ACC_SLEEP_DUR_SD	-0.2548	0.0925	-2.7536	5.89E-03
SWB	ACC_DIURNAL_INACT	-0.2494	0.0458	-5.4434	5.23E-08
SWB	SR_DaytimeSleepiness_adjBMI	-0.2106	0.0382	-5.509	3.61E-08
SWB	ACC_N_SLEEP_EPISODES	0.0599	0.0477	1.2566	2.09E-01
SnoringBMIadj	MDD	0.05	0.0502	0.9971	3.19E-01
SnoringBMIadj	SAD	0.0068	0.0379	0.178	8.59E-01
SnoringBMIadj	SWB	0.0925	0.0417	2.2202	2.64E-02
SnoringBMIadj	ADHD	0.014	0.042	0.3332	7.39E-01
SnoringBMIadj	Per90	0.4548	0.1187	3.8333	1.26E-04
SnoringBMIadj	CigDay	-0.0309	0.0272	-1.1373	2.55E-01
SnoringBMIadj	FG	0.0422	0.027	1.5599	1.19E-01
SnoringBMIadj	FI	0.1233	0.0328	3.7593	1.70E-04
SnoringBMIadj	MI	0.0492	0.0281	1.7508	8.00E-02
SnoringBMIadj	PP	0.0011	0.0239	0.0482	9.62E-01
SnoringBMIadj	TG	0.0639	0.0204	3.1327	1.73E-03
SnoringBMIadj	Drnk_Wk	-0.0298	0.0262	-1.1388	2.55E-01
SnoringBMIadj	caffein	0.0282	0.0446	0.6331	5.27E-01
SnoringBMIadj	BMI	-0.0044	0.0248	-0.1774	8.59E-01
SnoringBMIadj	CAD	0.0171	0.0326	0.5256	5.99E-01
SnoringBMIadj	CRP	0.0452	0.0222	2.0325	4.21E-02
SnoringBMIadj	DBP	0.0241	0.0204	1.1797	2.38E-01
SnoringBMIadj	HDL	-0.0242	0.0193	-1.2553	2.09E-01
SnoringBMIadj	LDL	0.0335	0.0206	1.6251	1.04E-01
SnoringBMIadj	SBP	0.0151	0.022	0.6861	4.93E-01
SnoringBMIadj	SCZ	-0.0912	0.019	-4.7991	1.59E-06
SnoringBMIadj	T2D	0.0653	0.0201	3.2428	1.18E-03
SnoringBMIadj	PTST	-0.0816	0.0516	-1.5831	1.13E-01
SnoringBMIadj	eGFR	-0.0089	0.0188	-0.4754	6.34E-01
SnoringBMIadj	VitD	-0.0369	0.0225	-1.6429	1.00E-01
SnoringBMIadj	HbA1c	0.0023	0.0274	0.0853	9.32E-01
SnoringBMIadj	biPol	0.0159	0.0383	0.4145	6.79E-01
SnoringBMIadj	PA_overall	-0.0993	0.0308	-3.2268	1.25E-03
SnoringBMIadj	PA_walking	-0.1121	0.0381	-2.9435	3.25E-03
SnoringBMIadj	2hGLUC	0.0678	0.049	1.3816	1.67E-01
SnoringBMIadj	nonHDL	0.053	0.0212	2.5007	1.24E-02
SnoringBMIadj	PA_moderate	-0.0186	0.0493	-0.3764	7.07E-01
SnoringBMIadj	SR_Insomnia	-0.0607	0.0265	-2.2905	2.20E-02
SnoringBMIadj	mood_swings	0.0773	0.0261	2.9568	3.11E-03
SnoringBMIadj	sleep_apnea	0.3934	0.1967	1.9997	4.55E-02
SnoringBMIadj	PA_sedentary	0.0519	0.0374	1.3862	1.66E-01
SnoringBMIadj	SR_LongSleep	0.0609	0.0365	1.6669	9.55E-02
SnoringBMIadj	anxiety	0.0833	0.033	2.5268	1.15E-02
SnoringBMIadj	average_spo2	-0.0963	0.0646	-1.49	1.36E-01
SnoringBMIadj	minimum_spo2	-0.4502	0.0964	-4.6716	2.99E-06
SnoringBMIadj	Anorexia	-0.1532	0.0349	-4.3854	1.16E-05
SnoringBMIadj	SR_ShortSleep	-0.0785	0.0263	-2.9827	2.86E-03
SnoringBMIadj	SR_chronotype	-0.0036	0.0217	-0.1676	8.67E-01
SnoringBMIadj	WHRadjBMI	0.0972	0.0309	3.1484	1.64E-03
SnoringBMIadj	caffein_intake	0.0332	0.0327	1.0162	3.10E-01
SnoringBMIadj	SR_SleepDuration	0.0934	0.0258	3.615	3.00E-04
SnoringBMIadj	neurotisicm	0.0603	0.0264	2.2873	2.22E-02
SnoringBMIadj	SR_DaytimeNapping	0.0993	0.0239	4.1494	3.33E-05
SnoringBMIadj	SR_morning_person	-0.0011	0.0228	-0.0474	9.62E-01
SnoringBMIadj	relativeAmplitude	-0.1564	0.1678	-0.9322	3.51E-01
SnoringBMIadj	ACC_L5_TIME	-0.0027	0.0387	-0.0699	9.44E-01
SnoringBMIadj	ACC_M10_TIME	-0.0564	0.0422	-1.3383	1.81E-01
SnoringBMIadj	SR_DaytimeSleepiness	0.1783	0.0275	6.4849	8.88E-11
SnoringBMIadj	ACC_SLEEP_DUR	0.0031	0.0338	0.0919	9.27E-01
SnoringBMIadj	ACC_SLEEP_EFF	-0.0183	0.0382	-0.478	6.33E-01
SnoringBMIadj	ACC_SLEEP_MIDP	-0.0156	0.0467	-0.3338	7.39E-01
SnoringBMIadj	ACC_SLEEP_DUR_SD	-0.0162	0.0637	-0.2551	7.99E-01
SnoringBMIadj	ACC_DIURNAL_INACT	-0.0557	0.0356	-1.5636	1.18E-01
SnoringBMIadj	SR_DaytimeSleepiness_adjBMI	0.1798	0.0275	6.5439	5.99E-11
SnoringBMIadj	ACC_N_SLEEP_EPISODES	0.0226	0.0309	0.7313	4.65E-01
VitD	MDD	-0.1347	0.0429	-3.1432	1.67E-03
VitD	SAD	-0.0293	0.0338	-0.8675	3.86E-01
VitD	SWB	0.0635	0.0316	2.0108	4.43E-02
VitD	ADHD	0.0037	0.0361	0.1017	9.19E-01
VitD	Per90	-0.012	0.0849	-0.1413	8.88E-01
VitD	CigDay	0.1604	0.0248	6.4723	9.65E-11
VitD	FG	-0.0503	0.0278	-1.8095	7.04E-02
VitD	FI	-0.0696	0.0311	-2.2339	2.55E-02
VitD	MI	-0.0633	0.0215	-2.9429	3.25E-03
VitD	PP	0.0064	0.0179	0.3572	7.21E-01
VitD	TG	-0.2729	0.0294	-9.281	1.68E-20
VitD	Drnk_Wk	-0.0651	0.0224	-2.9087	3.63E-03
VitD	caffein	0.077	0.0367	2.097	3.60E-02
VitD	BMI	-0.1146	0.0283	-4.0473	5.18E-05
VitD	CAD	-0.0555	0.0234	-2.3746	1.76E-02
VitD	CRP	-0.1402	0.0267	-5.2453	1.56E-07
VitD	DBP	-0.0223	0.0219	-1.0196	3.08E-01
VitD	HDL	0.1251	0.0258	4.8447	1.27E-06
VitD	LDL	-0.1124	0.0282	-3.9845	6.76E-05
VitD	SBP	-0.0079	0.0207	-0.3799	7.04E-01
VitD	SCZ	-0.0856	0.0177	-4.8372	1.32E-06
VitD	T2D	-0.2078	0.0277	-7.4936	6.70E-14
VitD	PTST	-0.1565	0.0495	-3.1594	1.58E-03
VitD	eGFR	-0.0977	0.0175	-5.5776	2.44E-08
VitD	HbA1c	-0.0106	0.0252	-0.4225	6.73E-01
VitD	biPol	-0.0587	0.0314	-1.8691	6.16E-02
VitD	PA_overall	0.287	0.0309	9.295	1.47E-20
VitD	PA_walking	0.2469	0.0392	6.2917	3.14E-10
VitD	2hGLUC	-0.1409	0.0405	-3.4772	5.07E-04
VitD	nonHDL	-0.196	0.032	-6.1221	9.23E-10
VitD	PA_moderate	0.2355	0.0469	5.02	5.17E-07
VitD	SR_Insomnia	-0.0192	0.0222	-0.8668	3.86E-01
VitD	mood_swings	-0.032	0.0214	-1.4922	1.36E-01
VitD	sleep_apnea	0.063	0.1112	0.5667	5.71E-01
VitD	PA_sedentary	-0.2908	0.0447	-6.507	7.66E-11
VitD	SR_LongSleep	-0.0414	0.0284	-1.461	1.44E-01
VitD	anxiety	0.07	0.0296	2.3686	1.79E-02
VitD	average_spo2	-0.0762	0.0574	-1.3291	1.84E-01
VitD	minimum_spo2	-0.0139	0.0653	-0.2124	8.32E-01
VitD	Anorexia	0.0595	0.0331	1.7961	7.25E-02
VitD	SR_ShortSleep	-0.0511	0.0249	-2.0489	4.05E-02
VitD	SR_chronotype	0.1451	0.0217	6.6824	2.35E-11
VitD	SnoringBMIadj	-0.0369	0.0225	-1.6429	1.00E-01
VitD	WHRadjBMI	-0.0913	0.0259	-3.5252	4.23E-04
VitD	caffein_intake	0.0855	0.0271	3.154	1.61E-03
VitD	SR_SleepDuration	0.0296	0.0221	1.3424	1.79E-01
VitD	neurotisicm	-0.0259	0.0185	-1.3996	1.62E-01
VitD	SR_DaytimeNapping	-0.1083	0.0191	-5.6685	1.44E-08
VitD	SR_morning_person	0.1302	0.0217	6.0024	1.94E-09
VitD	relativeAmplitude	-0.4634	0.2568	-1.8043	7.12E-02
VitD	ACC_L5_TIME	-0.13	0.0337	-3.8597	1.14E-04
VitD	ACC_M10_TIME	-0.0783	0.0366	-2.1376	3.25E-02
VitD	SR_DaytimeSleepiness	-0.1068	0.0217	-4.9188	8.71E-07
VitD	ACC_SLEEP_DUR	0.0713	0.0373	1.912	5.59E-02
VitD	ACC_SLEEP_EFF	0.1622	0.0402	4.0376	5.40E-05
VitD	ACC_SLEEP_MIDP	-0.0846	0.0424	-1.9965	4.59E-02
VitD	ACC_SLEEP_DUR_SD	-0.1296	0.0633	-2.0459	4.08E-02
VitD	ACC_DIURNAL_INACT	-0.1788	0.0305	-5.8651	4.49E-09
VitD	SR_DaytimeSleepiness_adjBMI	-0.0784	0.0213	-3.6814	2.32E-04
VitD	ACC_N_SLEEP_EPISODES	-0.0025	0.0283	-0.0878	9.30E-01
anxiety	MDD	-0.0101	0.0568	-0.1784	8.58E-01
anxiety	SAD	-0.0332	0.0431	-0.7717	4.40E-01
anxiety	SWB	-0.1592	0.0523	-3.0447	2.33E-03
anxiety	ADHD	-0.2521	0.0418	-6.0315	1.62E-09
anxiety	Per90	-0.0856	0.0982	-0.8715	3.83E-01
anxiety	CigDay	0.2024	0.0361	5.613	1.99E-08
anxiety	FG	0.0746	0.0359	2.078	3.77E-02
anxiety	FI	0.1178	0.038	3.1001	1.93E-03
anxiety	MI	-0.1495	0.0313	-4.7704	1.84E-06
anxiety	PP	0.1361	0.0252	5.4089	6.34E-08
anxiety	TG	-0.1507	0.0241	-6.2614	3.82E-10
anxiety	Drnk_Wk	0.0279	0.0319	0.8726	3.83E-01
anxiety	caffein	0.1554	0.0526	2.9571	3.11E-03
anxiety	BMI	-0.3939	0.0235	-16.7341	7.39E-63
anxiety	CAD	-0.103	0.0343	-3.0015	2.69E-03
anxiety	CRP	-0.2619	0.0344	-7.6119	2.70E-14
anxiety	DBP	0.1392	0.0237	5.8774	4.17E-09
anxiety	HDL	0.1818	0.02	9.1083	8.37E-20
anxiety	LDL	-0.0442	0.022	-2.0075	4.47E-02
anxiety	SBP	0.1668	0.0254	6.5701	5.03E-11
anxiety	SCZ	0.2854	0.0238	11.9711	5.03E-33
anxiety	T2D	-0.175	0.0223	-7.8362	4.64E-15
anxiety	PTST	-0.0467	0.0601	-0.7764	4.37E-01
anxiety	eGFR	0.0517	0.023	2.243	2.49E-02
anxiety	VitD	0.07	0.0296	2.3686	1.79E-02
anxiety	HbA1c	-0.1346	0.0353	-3.8169	1.35E-04
anxiety	biPol	0.1713	0.0464	3.695	2.20E-04
anxiety	PA_overall	0.2348	0.0334	7.0381	1.95E-12
anxiety	PA_walking	0.1205	0.0469	2.5675	1.02E-02
anxiety	2hGLUC	0.0658	0.053	1.241	2.15E-01
anxiety	nonHDL	-0.0792	0.0206	-3.8512	1.18E-04
anxiety	PA_moderate	0.2873	0.0554	5.1867	2.14E-07
anxiety	SR_Insomnia	0.0046	0.0315	0.1452	8.85E-01
anxiety	mood_swings	-0.0168	0.0309	-0.5431	5.87E-01
anxiety	sleep_apnea	0.1106	0.1487	0.7438	4.57E-01
anxiety	PA_sedentary	-0.1952	0.0439	-4.4468	8.72E-06
anxiety	SR_LongSleep	-0.1427	0.0414	-3.4471	5.67E-04
anxiety	average_spo2	0.1076	0.0752	1.4316	1.52E-01
anxiety	minimum_spo2	-0.014	0.0811	-0.1731	8.63E-01
anxiety	Anorexia	0.2788	0.0392	7.1173	1.10E-12
anxiety	SR_ShortSleep	-0.1308	0.0326	-4.016	5.92E-05
anxiety	SR_chronotype	0.0364	0.0254	1.4332	1.52E-01
anxiety	SnoringBMIadj	0.0833	0.033	2.5268	1.15E-02
anxiety	WHRadjBMI	-0.0117	0.032	-0.3644	7.16E-01
anxiety	caffein_intake	0.273	0.0362	7.5507	4.33E-14
anxiety	SR_SleepDuration	0.0276	0.0294	0.9386	3.48E-01
anxiety	neurotisicm	0.3351	0.0234	14.3129	1.82E-46
anxiety	SR_DaytimeNapping	-0.0581	0.0257	-2.2627	2.37E-02
anxiety	SR_morning_person	0.0456	0.0266	1.7103	8.72E-02
anxiety	relativeAmplitude	-0.4803	0.2783	-1.7256	8.44E-02
anxiety	ACC_L5_TIME	-0.0882	0.0469	-1.8794	6.02E-02
anxiety	ACC_M10_TIME	-0.1126	0.0553	-2.0369	4.17E-02
anxiety	SR_DaytimeSleepiness	-0.0383	0.0285	-1.3441	1.79E-01
anxiety	ACC_SLEEP_DUR	-0.0566	0.0416	-1.3628	1.73E-01
anxiety	ACC_SLEEP_EFF	0.041	0.0448	0.9159	3.60E-01
anxiety	ACC_SLEEP_MIDP	-0.0886	0.0553	-1.6034	1.09E-01
anxiety	ACC_SLEEP_DUR_SD	-0.2589	0.0885	-2.9255	3.44E-03
anxiety	ACC_DIURNAL_INACT	-0.228	0.0411	-5.5425	2.98E-08
anxiety	SR_DaytimeSleepiness_adjBMI	0.0462	0.0286	1.6143	1.06E-01
anxiety	ACC_N_SLEEP_EPISODES	-0.05	0.0345	-1.4502	1.47E-01
average_spo2	MDD	-0.0579	0.116	-0.4992	6.18E-01
average_spo2	SAD	-0.0874	0.0915	-0.9549	3.40E-01
average_spo2	SWB	-0.0898	0.102	-0.8805	3.79E-01
average_spo2	ADHD	-0.072	0.0991	-0.7266	4.67E-01
average_spo2	Per90	-0.7423	0.1334	-5.5631	2.65E-08
average_spo2	CigDay	0.129	0.0653	1.9762	4.81E-02
average_spo2	FG	-0.0379	0.0698	-0.5425	5.88E-01
average_spo2	FI	0.041	0.0869	0.4722	6.37E-01
average_spo2	MI	-0.0711	0.0647	-1.0978	2.72E-01
average_spo2	PP	0.06	0.0542	1.1056	2.69E-01
average_spo2	TG	0.0029	0.0431	0.0673	9.46E-01
average_spo2	Drnk_Wk	0.0517	0.0572	0.9038	3.66E-01
average_spo2	caffein	-0.0647	0.11	-0.5881	5.56E-01
average_spo2	BMI	0.0909	0.056	1.6232	1.05E-01
average_spo2	CAD	0.006	0.0716	0.084	9.33E-01
average_spo2	CRP	-0.0295	0.0519	-0.568	5.70E-01
average_spo2	DBP	0.0644	0.0544	1.1832	2.37E-01
average_spo2	HDL	0.0095	0.0466	0.2039	8.38E-01
average_spo2	LDL	-0.0851	0.0565	-1.5073	1.32E-01
average_spo2	SBP	0.0773	0.0549	1.4081	1.59E-01
average_spo2	SCZ	-0.1373	0.0573	-2.3987	1.65E-02
average_spo2	T2D	-0.055	0.0466	-1.1787	2.39E-01
average_spo2	PTST	-0.1824	0.1303	-1.3996	1.62E-01
average_spo2	eGFR	-0.0659	0.056	-1.1771	2.39E-01
average_spo2	VitD	-0.0762	0.0574	-1.3291	1.84E-01
average_spo2	HbA1c	-0.1893	0.0804	-2.3561	1.85E-02
average_spo2	biPol	-0.019	0.0935	-0.2037	8.39E-01
average_spo2	PA_overall	-0.0461	0.0768	-0.6003	5.48E-01
average_spo2	PA_walking	-0.0724	0.0871	-0.8314	4.06E-01
average_spo2	2hGLUC	0.0562	0.1182	0.4753	6.35E-01
average_spo2	nonHDL	-0.065	0.0533	-1.2211	2.22E-01
average_spo2	PA_moderate	-0.0672	0.1216	-0.553	5.80E-01
average_spo2	SR_Insomnia	-0.1113	0.0634	-1.7569	7.89E-02
average_spo2	mood_swings	0.0531	0.0617	0.8614	3.89E-01
average_spo2	sleep_apnea	-1.0683	0.494	-2.1628	3.06E-02
average_spo2	PA_sedentary	0.0166	0.0853	0.1948	8.46E-01
average_spo2	SR_LongSleep	-0.2108	0.0883	-2.3886	1.69E-02
average_spo2	anxiety	0.1076	0.0752	1.4316	1.52E-01
average_spo2	minimum_spo2	0.5102	0.1356	3.7623	1.68E-04
average_spo2	Anorexia	0.1088	0.0777	1.4	1.62E-01
average_spo2	SR_ShortSleep	-0.0582	0.0661	-0.8808	3.78E-01
average_spo2	SR_chronotype	-0.0892	0.0568	-1.571	1.16E-01
average_spo2	SnoringBMIadj	-0.0963	0.0646	-1.49	1.36E-01
average_spo2	WHRadjBMI	-0.1969	0.0826	-2.3851	1.71E-02
average_spo2	caffein_intake	-0.057	0.0791	-0.7207	4.71E-01
average_spo2	SR_SleepDuration	-0.081	0.0599	-1.3529	1.76E-01
average_spo2	neurotisicm	0.0136	0.0538	0.2531	8.00E-01
average_spo2	SR_DaytimeNapping	-0.0146	0.0531	-0.2756	7.83E-01
average_spo2	SR_morning_person	-0.106	0.0608	-1.7417	8.16E-02
average_spo2	relativeAmplitude	-0.4389	0.4032	-1.0885	2.76E-01
average_spo2	ACC_L5_TIME	0.0172	0.0991	0.1738	8.62E-01
average_spo2	ACC_M10_TIME	0.1113	0.1076	1.0352	3.01E-01
average_spo2	SR_DaytimeSleepiness	-0.0619	0.0595	-1.0395	2.99E-01
average_spo2	ACC_SLEEP_DUR	-0.0337	0.0869	-0.3882	6.98E-01
average_spo2	ACC_SLEEP_EFF	0.0108	0.0964	0.1116	9.11E-01
average_spo2	ACC_SLEEP_MIDP	0.0452	0.1256	0.3599	7.19E-01
average_spo2	ACC_SLEEP_DUR_SD	-0.0764	0.1822	-0.4193	6.75E-01
average_spo2	ACC_DIURNAL_INACT	-0.0896	0.0918	-0.9758	3.29E-01
average_spo2	SR_DaytimeSleepiness_adjBMI	-0.0742	0.0594	-1.2478	2.12E-01
average_spo2	ACC_N_SLEEP_EPISODES	0.0159	0.0765	0.2078	8.35E-01
caffein	MDD	0.1708	0.0808	2.1147	3.45E-02
caffein	SAD	0.0514	0.0592	0.8677	3.86E-01
caffein	SWB	0.1338	0.065	2.0572	3.97E-02
caffein	ADHD	0.0732	0.0666	1.0988	2.72E-01
caffein	Per90	0.0295	0.1384	0.2134	8.31E-01
caffein	CigDay	-0.0674	0.0398	-1.6958	8.99E-02
caffein	FG	-0.0612	0.0458	-1.3349	1.82E-01
caffein	FI	0.0188	0.0503	0.3738	7.09E-01
caffein	MI	0.1597	0.0396	4.0325	5.52E-05
caffein	PP	0.0644	0.0326	1.9782	4.79E-02
caffein	TG	0.0638	0.0331	1.9299	5.36E-02
caffein	Drnk_Wk	0.3313	0.0408	8.1182	4.73E-16
caffein	BMI	0.1678	0.0362	4.6314	3.63E-06
caffein	CAD	0.2163	0.0464	4.6587	3.18E-06
caffein	CRP	0.0847	0.0359	2.3613	1.82E-02
caffein	DBP	0.0901	0.0304	2.967	3.01E-03
caffein	HDL	-0.1354	0.0336	-4.0315	5.54E-05
caffein	LDL	-0.0057	0.036	-0.1586	8.74E-01
caffein	SBP	0.0952	0.0329	2.8964	3.77E-03
caffein	SCZ	-0.1203	0.034	-3.5332	4.11E-04
caffein	T2D	0.1454	0.0308	4.7155	2.41E-06
caffein	PTST	0.1529	0.0887	1.7238	8.47E-02
caffein	eGFR	-0.025	0.0344	-0.7274	4.67E-01
caffein	VitD	0.077	0.0367	2.097	3.60E-02
caffein	HbA1c	0.0528	0.0407	1.2979	1.94E-01
caffein	biPol	-0.1123	0.0656	-1.7125	8.68E-02
caffein	PA_overall	-0.0486	0.0587	-0.8286	4.07E-01
caffein	PA_walking	-0.0719	0.0608	-1.1816	2.37E-01
caffein	2hGLUC	-0.0622	0.0729	-0.8525	3.94E-01
caffein	nonHDL	5e-04	0.0369	0.0128	9.90E-01
caffein	PA_moderate	-0.0604	0.0846	-0.7136	4.75E-01
caffein	SR_Insomnia	0.1318	0.0406	3.2491	1.16E-03
caffein	mood_swings	0.1233	0.0415	2.9711	2.97E-03
caffein	sleep_apnea	0.0249	0.1989	0.125	9.01E-01
caffein	PA_sedentary	-0.0942	0.0575	-1.6371	1.02E-01
caffein	SR_LongSleep	0.0665	0.0543	1.2248	2.21E-01
caffein	anxiety	0.1554	0.0526	2.9571	3.11E-03
caffein	average_spo2	-0.0647	0.11	-0.5881	5.56E-01
caffein	minimum_spo2	-0.1277	0.1308	-0.9768	3.29E-01
caffein	Anorexia	0.0103	0.0549	0.1872	8.52E-01
caffein	SR_ShortSleep	0.0208	0.0455	0.4561	6.48E-01
caffein	SR_chronotype	0.0773	0.0353	2.1918	2.84E-02
caffein	SnoringBMIadj	0.0282	0.0446	0.6331	5.27E-01
caffein	WHRadjBMI	-0.0529	0.0509	-1.0406	2.98E-01
caffein	caffein_intake	-0.0672	0.0504	-1.3342	1.82E-01
caffein	SR_SleepDuration	-0.0303	0.0426	-0.7114	4.77E-01
caffein	neurotisicm	0.1204	0.0385	3.1242	1.78E-03
caffein	SR_DaytimeNapping	-0.0394	0.0395	-0.9976	3.19E-01
caffein	SR_morning_person	0.0731	0.0367	1.9903	4.66E-02
caffein	relativeAmplitude	-0.4735	0.3135	-1.51	1.31E-01
caffein	ACC_L5_TIME	-0.0051	0.0651	-0.078	9.38E-01
caffein	ACC_M10_TIME	-0.0923	0.0702	-1.3158	1.88E-01
caffein	SR_DaytimeSleepiness	-0.0284	0.0442	-0.6421	5.21E-01
caffein	ACC_SLEEP_DUR	0.1377	0.0518	2.6561	7.90E-03
caffein	ACC_SLEEP_EFF	0.1149	0.0637	1.8035	7.13E-02
caffein	ACC_SLEEP_MIDP	-0.0388	0.0684	-0.5668	5.71E-01
caffein	ACC_SLEEP_DUR_SD	0.0119	0.0863	0.1384	8.90E-01
caffein	ACC_DIURNAL_INACT	0.009	0.0595	0.1508	8.80E-01
caffein	SR_DaytimeSleepiness_adjBMI	-0.0525	0.0443	-1.1852	2.36E-01
caffein	ACC_N_SLEEP_EPISODES	0.0503	0.0558	0.9025	3.67E-01
caffein_intake	MDD	-0.1039	0.0571	-1.8193	6.89E-02
caffein_intake	SAD	-0.0144	0.0442	-0.3245	7.46E-01
caffein_intake	SWB	-0.0048	0.0425	-0.1133	9.10E-01
caffein_intake	ADHD	-0.2901	0.046	-6.3014	2.95E-10
caffein_intake	Per90	0.0239	0.0989	0.2412	8.09E-01
caffein_intake	CigDay	0.5027	0.0601	8.3621	6.16E-17
caffein_intake	FG	0.0594	0.0372	1.5965	1.10E-01
caffein_intake	FI	0.1002	0.0382	2.6217	8.75E-03
caffein_intake	MI	-0.1859	0.035	-5.3181	1.05E-07
caffein_intake	PP	0.0037	0.0245	0.1505	8.80E-01
caffein_intake	TG	-0.0669	0.0288	-2.325	2.01E-02
caffein_intake	Drnk_Wk	0.1309	0.0302	4.3393	1.43E-05
caffein_intake	caffein	-0.0672	0.0504	-1.3342	1.82E-01
caffein_intake	BMI	-0.3473	0.0256	-13.5891	4.65E-42
caffein_intake	CAD	-0.181	0.0344	-5.2591	1.45E-07
caffein_intake	CRP	-0.2125	0.037	-5.7463	9.12E-09
caffein_intake	DBP	0.0487	0.0299	1.6326	1.03E-01
caffein_intake	HDL	0.104	0.0267	3.8886	1.01E-04
caffein_intake	LDL	-0.0204	0.0277	-0.7378	4.61E-01
[truncated: 1,661 more rows]

## Sheet: Supplementary Table 3
							5 factor model
	GLS1	GLS4	GLS5	GLS3	GLS2					5 factor model resembles RUSATED model quite well, however we cannot split sleep regularity and efficiency based on the data 6 Factor and 7 Factor model are basically the same 6 factor model creates a new factor which we did not annotate 7 Factor model finally splits regulatiry and continuit in its own however also keeps the new unannotated factor
SR_chronotype	0.97	0.22	-0.36	-0.08	0.04
SR_morning_person	0.96	0.21	-0.37	-0.09	0.06					confirmatory factor analysis did not confirm the new unanotated factor thus we stick to 5 factor model for further analysis
ACC_SLEEP_MIDP	0.88	0.18	-0.33	-0.06	0.05		timing
ACC_L5_TIME	0.92	0.04	-0.22	-0.02	0.01
ACC_M10_TIME	0.9	0.12	-0.27	-0.21	0.06
SR_DaytimeNapping	-0.03	0.78	0.09	0.1	-0.07
SR_DaytimeSleepiness	-0.03	0.9	-0.02	-0.16	0			alertness during waking hours
SR_DaytimeSleepiness_adjBMI	-0.03	0.87	-0.07	-0.15	0.02
ACC_DIURNAL_INACT	0.05	0.31	0.24	0.18	-0.02
ACC_SLEEP_DUR_SD	-0.06	-0.05	0.73	-0.09	0.16
relativeAmplitude	-0.04	-0.05	0.96	-0.24	0.03				sleep regularity
ACC_SLEEP_EFF	0	0.06	0.61	-0.28	0.02					Efficiency/Continuity
ACC_N_SLEEP_EPISODES	0.01	0.07	0.26	0.08	-0.03
SR_SleepDuration	-0.04	-0.01	0	1	0.05
SR_ShortSleep	-0.03	-0.16	-0.18	0.85	0.04						Duration
ACC_SLEEP_DUR	0.05	0.1	-0.34	0.42	0
SR_LongSleep	-0.02	0.23	0.14	0.56	0.05
SnoringBMIadj	0	0.12	-0.13	0.03	0.41
average_spo2	0.01	0.01	0.04	-0.01	0.72							respiratory sleep health
minimum_spo2	-0.02	-0.1	0.16	0.05	0.96
sleep_apnea	-0.01	-0.11	0.05	0.05	1
Per90	0.04	-0.1	0.18	0.02	0.98
SR_Insomnia	0.03	0.28	0.18	-0.47	0.02								low sleep quality
								6 factor model
	GLS1	GLS4	GLS6	GLS3	GLS2	GLS5
ACC_L5_TIME	0.93	0.06	-0.1	0.03	-0.09	0.01
ACC_M10_TIME	0.91	0.15	-0.12	-0.14	-0.17	0.06
SR_chronotype	0.96	0.22	-0.27	-0.07	-0.15	0.03		timing
SR_morning_person	0.96	0.22	-0.27	-0.06	-0.18	0.05
ACC_SLEEP_MIDP	0.89	0.16	-0.3	-0.1	0.03	0.04
SR_DaytimeNapping	-0.01	0.71	0.12	0.01	0.35	-0.08
SR_DaytimeSleepiness	-0.01	0.87	0.14	-0.17	0.14	-0.01			alertness during waking hours
SR_DaytimeSleepiness_adjBMI	-0.01	0.86	0.12	-0.14	0.09	0
relativeAmplitude	-0.06	-0.09	0.7	-0.33	0.28	0.05
ACC_SLEEP_DUR_SD	-0.08	-0.14	0.35	-0.29	0.41	0.18				sleep regularity
ACC_SLEEP_EFF	0.02	0.15	0.84	-0.09	-0.17	0.02					Efficiency/Continuity
ACC_N_SLEEP_EPISODES	0.02	0.11	0.39	0.18	0	-0.03
SR_LongSleep	-0.03	0.14	-0.1	0.37	0.61	0.04
SR_ShortSleep	-0.01	-0.08	0.05	1	0.04	0.03						Duration
SR_SleepDuration	-0.03	-0.02	0	0.96	0.42	0.05
ACC_SLEEP_DUR	0.03	-0.04	-0.78	0.11	0.56	0
ACC_DIURNAL_INACT	0.04	0.19	-0.08	-0.07	0.57	-0.02							unannotated factor
SnoringBMIadj	0.01	0.17	0.02	0.11	-0.13	0.4
average_spo2	0.01	-0.03	-0.13	-0.11	0.13	0.73								respiratory sleep health
minimum_spo2	-0.02	-0.06	0.13	0.06	-0.01	0.97
sleep_apnea	-0.01	-0.1	-0.06	0.01	0.01	1
Per90	0.04	-0.08	0.09	0	0.03	0.99
SR_Insomnia	0.02	0.2	-0.04	-0.63	0.15	0.02									low sleep quality
									7 factor model
	GLS2	GLS4	GLS1	GLS7	GLS5	GLS6	GLS3
SR_chronotype	0.98	0.08	-0.38	0	-0.15	0.01	0.05
SR_morning_person	0.98	0.08	-0.4	0.01	-0.15	-0.01	0.07
ACC_L5_TIME	0.92	0.05	-0.2	-0.02	0.02	-0.05	0		timing
ACC_M10_TIME	0.89	0.09	-0.28	0.02	-0.17	-0.08	0.06
ACC_SLEEP_MIDP	0.86	0.03	-0.37	0.01	-0.18	0.17	0.06
SR_DaytimeNapping	0	0.71	0.09	0.05	0.06	0.26	-0.09
SR_DaytimeSleepiness	0	1	0.05	-0.05	-0.08	0	-0.04			alertness during waking hours
SR_DaytimeSleepiness_adjBMI	0	0.98	0.01	-0.06	-0.05	-0.04	-0.02
ACC_SLEEP_DUR_SD	-0.01	0.09	1	-0.29	-0.08	0.09	0.13
relativeAmplitude	-0.03	0	0.77	0.25	-0.21	0.07	0.04				sleep regularity
ACC_N_SLEEP_EPISODES	0	-0.08	-0.22	0.69	0.07	0.18	0					Efficiency/Continuity
ACC_SLEEP_EFF	0.02	0.06	0.15	0.83	-0.09	-0.16	0.03
SR_LongSleep	-0.03	0.1	0.09	0.05	0.34	0.6	0.05
SR_ShortSleep	0.01	-0.01	-0.14	0.03	0.86	0.02	0.01						Duration
SR_SleepDuration	-0.01	0.03	-0.01	0.08	0.92	0.35	0.03
ACC_SLEEP_DUR	0.01	-0.11	-0.13	-0.52	0.01	0.69	0.01
ACC_DIURNAL_INACT	0.02	0.06	0.08	0.14	-0.15	0.67	0							unannotated factor
SnoringBMIadj	0.02	0.18	-0.09	-0.01	0.11	-0.13	0.4
average_spo2	-0.01	-0.08	0.01	-0.02	-0.15	0.17	0.76								respiratory sleep health
minimum_spo2	-0.03	-0.09	0.07	0.12	0.03	0.01	0.97
sleep_apnea	-0.01	-0.08	0.1	-0.08	0.01	0	1
Per90	0.04	-0.07	0.16	0.03	0	0.01	0.98
SR_Insomnia	0	0.09	0.07	0.05	-0.63	0.2	0.05									low sleep quality

## Sheet: Supplementary Table 4
FACTOR	sleep trait	Unstand_Est	Unstand_SE	STD_Genotype	STD_Genotype_SE	STD_All	p_value	model	label in Figure 1B
F1	SR_chronotype	0.260503	0.00461483	0.970467	0.0171998	0.970467	5e-300	5 factor	timing
F1	SR_morning_person	0.385376	0.00719597	0.982885	0.0183627	0.982885	5e-300	5 factor	timing
F1	ACC_L5_TIME_RAW_SIN	0.269423	0.00912155	0.932369	0.0315483	0.932369	9.64e-192	5 factor	timing
F1	ACC_M10_TIME_RAW_SIN	0.229547	0.010304	0.894324	0.0401914	0.894324	6.12e-110	5 factor	timing
F1	ACC_SLEEP_MIDP_RAW_SIN	0.233581	0.00929116	0.877436	0.0349273	0.877436	1.81e-139	5 factor	timing
F2	relativeAmplitude	0.108748	0.0211728	0.984297	0.191482	0.984297	2.8e-07	5 factor	regularity
F2	ACC_SLEEP_DUR_SD_RAW_SIN	0.120338	0.0231403	0.671691	0.129056	0.671691	1.99e-07	5 factor	regularity
F3	SR_SleepDuration	0.241642	0.00659716	0.855843	0.0266125	0.789638	1.02e-293	5 factor	duration
F3	ACC_SLEEP_DUR_RAW_SIN	0.161184	0.0134913	0.447321	0.0364395	0.447321	6.71e-33	5 factor	duration
F3	SR_LongSleep	0.120056	0.0104746	0.445817	0.0395279	0.445817	2.05e-30	5 factor	duration
F3	SR_ShortSleep	0.221978	0.00705447	0.843092	0.0297194	0.785147	2.52e-217	5 factor	duration
F4	SR_DaytimeNapping	0.232893	0.00742017	0.805555	0.0256544	0.805555	3.1e-216	5 factor	alertness
F4	SR_DaytimeSleepiness	0.206093	0.006156	0.933753	0.0278808	0.933753	9.92e-246	5 factor	alertness
F4	SR_DaytimeSleepiness_adjBMI	0.194794	0.00614112	0.888591	0.0279735	0.888591	8.33e-221	5 factor	alertness
F4	ACC_DIURNAL_INACT_RAW_SIN	0.109326	0.0105363	0.318965	0.0307698	0.318965	3.18e-25	5 factor	alertness
F7	Per90	0.127201	0.0295456	0.570372	0.121956	0.570372	1.67e-05	5 factor	respiratory
F7	SnoringBMIadj	0.16909	0.0371081	0.738692	0.149462	0.743198	5.2e-06	5 factor	respiratory
F7	sleep_apnea	0.131216	0.034015	0.542243	0.131573	0.542242	0.000114508	5 factor	respiratory
F7	average_spo2	0.0661953	0.0249747	0.263581	0.0921467	0.263581	0.00803746	5 factor	respiratory
F7	minimum_spo2	0.14509	0.0316009	0.57496	0.115485	0.574959	4.4e-06	5 factor	respiratory
F5	ACC_N_SLEEP_EPISODES_RAW_SIN	0.25754	0.0287013	0.311581	0.0695271	0.424272	2.88e-19	5 factor	efficiency
F5	ACC_SLEEP_EFF_RAW_SIN	0.395767	0.0373578	1	0.365686	1.8752	3.18e-26	5 factor	efficiency
F6	SR_Insomnia	0.247933	0.00479956	1	0.0193583	1	5e-300	5 factor
F1	F2	-0.356543	0.0778775	-0.356694	0.0778872	-0.356694	4.69e-06	5 factor
F1	F3	-0.0647194	0.0272887	-0.0676013	0.0291391	-0.0676013	0.0177087	5 factor
F1	F4	0.0973327	0.0217651	0.0974031	0.021766	0.0974031	7.75e-06	5 factor
F1	F5	-0.0563884	0.0255263	-0.054633	0.0205631	-0.054633	0.0271725	5 factor
F1	F6	-0.0333365	0.0234135	-0.0333376	0.0234174	-0.0333376	0.154501	5 factor
F1	F7	0.00680649	0.0298218	0.00738262	0.0319913	0.00738262	0.819461	5 factor
F2	F3	-0.472243	0.0932054	-0.500507	0.0988213	-0.500507	4.05e-07	5 factor
F2	F4	0.191161	0.0810974	0.191107	0.0810829	0.191107	0.0184142	5 factor
F2	F5	0.311829	0.0928382	0.258492	0.0836657	0.258492	0.0007827	5 factor
F2	F6	-0.379623	0.0920182	-0.379659	0.0920197	-0.379659	3.7e-05	5 factor
F2	F7	0.0330794	0.0961302	0.0490861	0.102676	0.0490861	0.730763	5 factor
F3	F4	0.0314028	0.0281446	0.036523	0.0298867	0.036523	0.264522	5 factor
F3	F5	-0.221301	0.029696	-0.23241	0.0475727	-0.23241	9.18e-14	5 factor
F3	F6	0.538977	0.0215283	0.559333	0.0232224	0.559333	2.5e-138	5 factor
F3	F7	0.119751	0.0398864	0.132576	0.0436231	0.132576	0.00267951	5 factor
F4	F5	0.15702	0.0310208	0.117064	0.0316455	0.117064	4.15e-07	5 factor
F4	F6	-0.250234	0.0254434	-0.25018	0.0254392	-0.25018	7.96e-23	5 factor
F4	F7	0.176755	0.0471964	0.181692	0.0464063	0.181692	0.000180325	5 factor
F5	F6	-0.162096	0.028654	-0.113265	0.0301472	-0.113265	1.54e-08	5 factor
F7	F5	0.0553023	0.0366136	0.0434347	0.0291296	0.0434347	0.130934	5 factor
F7	F6	0.0353837	0.0342098	0.0320299	0.0364391	0.0320299	0.300988	5 factor
SR_ShortSleep	SR_ShortSleep	0.0156435	0.00210975	0.442246	0.0336142	0.383545	1.22e-13	5 factor
SR_SleepDuration	SR_SleepDuration	0.0156435	0.00119716	0.442246	0.0159528	0.376471	5.07e-39	5 factor
SnoringBMIadj	SnoringBMIadj	0.0156435	0.0124148	0.442246	0.218379	0.447657	0.207646	5 factor
ACC_N_SLEEP_EPISODES_RAW_SIN	ACC_N_SLEEP_EPISODES_RAW_SIN	0.0156435	0.0167966	0.442246	0.0668828	0.819993	0.351674	5 factor
SR_LongSleep	SR_LongSleep	0.0619775	0.00445641	0.801248	0.0587372	0.801247	5.7e-44	5 factor
SR_morning_person	SR_morning_person	0.00507433	0.00262268	0.0339364	0.0170658	0.0339364	0.0530161	5 factor
ACC_DIURNAL_INACT_RAW_SIN	ACC_DIURNAL_INACT_RAW_SIN	0.104768	0.0078752	0.898261	0.0674658	0.898261	2.21e-40	5 factor
ACC_L5_TIME_RAW_SIN	ACC_L5_TIME_RAW_SIN	0.0110388	0.00445482	0.130688	0.0532104	0.130688	0.0132139	5 factor
ACC_M10_TIME_RAW_SIN	ACC_M10_TIME_RAW_SIN	0.0131807	0.00460649	0.200184	0.0698799	0.200184	0.00421855	5 factor
ACC_SLEEP_DUR_RAW_SIN	ACC_SLEEP_DUR_RAW_SIN	0.119521	0.00866445	0.799904	0.0584693	0.799904	2.76e-43	5 factor
ACC_SLEEP_DUR_SD_RAW_SIN	ACC_SLEEP_DUR_SD_RAW_SIN	0.0175222	0.00660918	0.548831	0.205596	0.548831	0.00802086	5 factor
ACC_SLEEP_EFF_RAW_SIN	ACC_SLEEP_EFF_RAW_SIN	0.0532591	0.0279871	0.251635	1.36699	-2.51636	0.057042	5 factor
ACC_SLEEP_MIDP_RAW_SIN	ACC_SLEEP_MIDP_RAW_SIN	0.0163631	0.0051716	0.230107	0.0729609	0.230107	0.00155603	5 factor
Per90	Per90	0.0410146	0.0162001	0.674678	0.280685	0.674676	0.0113498	5 factor
SR_DaytimeNapping	SR_DaytimeNapping	0.0296554	0.00280415	0.351081	0.033429	0.351081	3.87e-26	5 factor
SR_DaytimeSleepiness	SR_DaytimeSleepiness	0.00614495	0.00107015	0.128105	0.0219256	0.128105	9.35e-09	5 factor
SR_DaytimeSleepiness_adjBMI	SR_DaytimeSleepiness_adjBMI	0.010078	0.000980358	0.210406	0.0203509	0.210406	8.68e-25	5 factor
SR_chronotype	SR_chronotype	0.00416972	0.00113909	0.0581936	0.0158498	0.0581936	0.000251646	5 factor
average_spo2	average_spo2	0.0741103	0.0170294	0.930525	0.215471	0.930525	1.35e-05	5 factor
minimum_spo2	minimum_spo2	0.051061	0.0192197	0.669422	0.265813	0.669422	0.00789085	5 factor
relativeAmplitude	relativeAmplitude	0.000415765	0.00643625	0.0311585	0.525049	0.0311585	0.948495	5 factor
sleep_apnea	sleep_apnea	0.0507689	0.0220621	0.705975	0.324598	0.705973	0.0213812	5 factor

## Sheet: Supplementary Table 5
FACTOR	sleep trait	Unstand_Est	Unstand_SE	STD_Genotype	STD_Genotype_SE	STD_All	p_value	model
F1	SR_chronotype	0.260245	0.00461754	0.969507	0.017211	0.969506	5e-300	7 factor
F1	SR_morning_person	0.384938	0.00719411	0.981841	0.0183594	0.981841	5e-300	7 factor
F1	ACC_L5_TIME_RAW_SIN	0.269709	0.00915344	0.933144	0.0316679	0.933143	8.01638e-191	7 factor
F1	ACC_M10_TIME_RAW_SIN	0.229876	0.0103347	0.895712	0.0403047	0.895712	1.31627e-109	7 factor
F1	ACC_SLEEP_MIDP_RAW_SIN	0.233999	0.00930817	0.879022	0.0349815	0.879022	1.8612e-139	7 factor
F2	relativeAmplitude	0.109754	0.0212835	0.99233	0.192364	0.99233	2.51224e-07	7 factor
F2	ACC_SLEEP_DUR_SD_RAW_SIN	0.119234	0.0230575	0.666255	0.128784	0.666255	2.32631e-07	7 factor
F3	SR_SleepDuration	0.239912	0.00642136	0.854722	0.0258425	0.794293	1.64326e-305	7 factor
F3	SR_LongSleep	0.117713	0.0103931	0.429144	0.0388432	0.429144	9.74835e-30	7 factor
F3	SR_ShortSleep	0.22114	0.00696627	0.848155	0.0294975	0.792024	3.7954e-221	7 factor
F4	SR_DaytimeNapping	0.217098	0.00765223	0.750694	0.0265073	0.750694	4.66801e-177	7 factor
F4	SR_DaytimeSleepiness	0.215452	0.00607344	0.976017	0.0275448	0.976018	1.2135e-275	7 factor
F4	SR_DaytimeSleepiness_adjBMI	0.204808	0.00602491	0.933989	0.0274894	0.933989	2.77479e-253	7 factor
F7	Per90	0.127336	0.028478	0.558068	0.118205	0.558068	7.77155e-06	7 factor
F7	SnoringBMIadj	0.167593	0.0353162	0.750388	0.149991	0.753986	2.08001e-06	7 factor
F7	sleep_apnea	0.130416	0.0332543	0.525226	0.128477	0.525226	8.78946e-05	7 factor
F7	average_spo2	0.0655053	0.0247243	0.251221	0.0903418	0.251221	0.00806269	7 factor
F7	minimum_spo2	0.145901	0.0303326	0.566965	0.111734	0.566965	1.50883e-06	7 factor
F5	ACC_N_SLEEP_EPISODES_RAW_SIN	0.247594	0.0242008	0.377922	0.0563872	0.500473	1.44267e-24	7 factor
F5	ACC_SLEEP_EFF_RAW_SIN	0.408381	0.0307138	1.60466	0.185554	1.60467	2.4307e-40	7 factor
F6	SR_Insomnia	0.247933	0.00479956	1	0.0193583	1	5e-300	7 factor
F8	ACC_SLEEP_DUR_RAW_SIN	19.3184	3219.38	47.2304	6693.4	47.2304	0.995212	7 factor
F8	ACC_DIURNAL_INACT_RAW_SIN	0.00320786	0.534748	0.0100683	1.4274	0.0100683	0.995214	7 factor
F1	F2	-0.357293	0.0779886	-0.357366	0.0779946	-0.357366	4.62e-06	7 factor
F1	F3	-0.0726663	0.0269422	-0.077241	0.028729	-0.077241	0.00699412	7 factor
F1	F4	0.0969552	0.0212171	0.0970426	0.0212254	0.0970426	4.8848e-06	7 factor
F1	F5	-0.0574142	0.0250351	-0.0600292	0.0217095	-0.0600292	0.0218279	7 factor
F1	F6	-0.0333621	0.0234271	-0.0333648	0.0234306	-0.0333648	0.154424	7 factor
F1	F7	0.00683218	0.0300766	0.00720951	0.0315554	0.00720951	0.8203	7 factor
F1	F8	0.00045003	0.0750893	0.000483088	0.0685654	0.000483088	0.995218	7 factor
F2	F3	-0.45824	0.0932223	-0.484817	0.0989122	-0.484817	8.85276e-07	7 factor
F2	F4	0.174453	0.0798845	0.174524	0.0798935	0.174524	0.0289758	7 factor
F2	F5	0.313626	0.0911533	0.294128	0.0834516	0.294128	0.000580344	7 factor
F2	F6	-0.37979	0.0920053	-0.379796	0.0920064	-0.379796	3.66064e-05	7 factor
F2	F7	0.0335924	0.0969615	0.044256	0.10141	0.044256	0.729004	7 factor
F2	F8	-0.00709001	1.18186	-0.00760365	1.07794	-0.00760365	0.995214	7 factor
F3	F4	0.0213785	0.0281726	0.025426	0.029972	0.025426	0.447949	7 factor
F3	F5	-0.180763	0.0290741	-0.210941	0.0325207	-0.210941	5.05657e-10	7 factor
F3	F6	0.569731	0.0212278	0.60117	0.0229243	0.60117	1.13729e-158	7 factor
F3	F7	0.131568	0.0408311	0.145379	0.0443488	0.145379	0.00127188	7 factor
F3	F8	0.00868907	1.4483	0.00993433	1.40818	0.00993433	0.995213	7 factor
F4	F5	0.145063	0.0294687	0.128195	0.0280294	0.128195	8.54008e-07	7 factor
F4	F6	-0.241581	0.0258319	-0.241631	0.0258318	-0.241631	8.59763e-21	7 factor
F4	F7	0.186189	0.0471498	0.189702	0.0466036	0.189702	7.85169e-05	7 factor
F4	F8	-0.000800022	0.133321	-0.000857239	0.121477	-0.000857239	0.995212	7 factor
F5	F6	-0.159883	0.0280356	-0.133967	0.027548	-0.133967	1.1783e-08	7 factor
F7	F5	0.0552601	0.0362184	0.0501096	0.0325682	0.0501096	0.127072	7 factor
F5	F8	-0.0101225	1.68696	-0.0097566	1.38258	-0.0097566	0.995212	7 factor
F7	F6	0.0353786	0.0344453	0.0332094	0.0359693	0.0332094	0.304375	7 factor
F6	F8	0.00239893	0.399867	0.00257231	0.364633	0.00257231	0.995213	7 factor
F7	F8	-0.000403149	0.0672172	-0.000484971	0.0687597	-0.000484971	0.995215	7 factor
SR_ShortSleep	SR_ShortSleep	0.0162965	0.0020527	0.427396	0.0332473	0.372698	2.03745e-15	7 factor
SR_SleepDuration	SR_SleepDuration	0.0162965	0.000958386	0.427396	0.0119516	0.369098	7.65817e-65	7 factor
SnoringBMIadj	SnoringBMIadj	0.0162965	0.0116887	0.427396	0.222173	0.431505	0.163256	7 factor
ACC_N_SLEEP_EPISODES_RAW_SIN	ACC_N_SLEEP_EPISODES_RAW_SIN	0.0162965	0.014287	0.427396	0.0644289	0.749527	0.254014	7 factor
SR_LongSleep	SR_LongSleep	0.0625348	0.00445635	0.815835	0.0586169	0.815835	9.82758e-45	7 factor
SR_morning_person	SR_morning_person	0.00541164	0.00264188	0.035988	0.0172125	0.035988	0.04052	7 factor
ACC_DIURNAL_INACT_RAW_SIN	ACC_DIURNAL_INACT_RAW_SIN	0.11671	0.00897991	0.999899	0.0764653	0.999899	1.2764e-38	7 factor
ACC_L5_TIME_RAW_SIN	ACC_L5_TIME_RAW_SIN	0.0108847	0.00444585	0.129243	0.0531187	0.129243	0.014354	7 factor
ACC_M10_TIME_RAW_SIN	ACC_M10_TIME_RAW_SIN	0.0130294	0.00461556	0.1977	0.0700437	0.1977	0.00475859	7 factor
ACC_SLEEP_DUR_RAW_SIN	ACC_SLEEP_DUR_RAW_SIN	-373.055	124387	-2229.71	632264	-2229.71	0.997607	7 factor
ACC_SLEEP_DUR_SD_RAW_SIN	ACC_SLEEP_DUR_SD_RAW_SIN	0.0177867	0.00655501	0.556105	0.204385	0.556104	0.00665872	7 factor
ACC_SLEEP_EFF_RAW_SIN	ACC_SLEEP_EFF_RAW_SIN	-0.063403	0.0231114	-1.57495	0.586645	-1.57496	0.00608128	7 factor
ACC_SLEEP_MIDP_RAW_SIN	ACC_SLEEP_MIDP_RAW_SIN	0.0161677	0.00517286	0.227321	0.0729674	0.227321	0.00177515	7 factor
Per90	Per90	0.0409801	0.016369	0.688559	0.284923	0.68856	0.0122962	7 factor
SR_DaytimeNapping	SR_DaytimeNapping	0.0367628	0.00282522	0.436458	0.0337668	0.436458	1.04039e-38	7 factor
SR_DaytimeSleepiness	SR_DaytimeSleepiness	0.00219971	0.000993559	0.0473898	0.0204879	0.0473898	0.0268306	7 factor
SR_DaytimeSleepiness_adjBMI	SR_DaytimeSleepiness_adjBMI	0.00607651	0.000874538	0.127665	0.0183072	0.127665	3.69838e-12	7 factor
SR_chronotype	SR_chronotype	0.00430458	0.00115295	0.0600573	0.0160537	0.0600572	0.000188809	7 factor
average_spo2	average_spo2	0.0742011	0.0170664	0.936888	0.216563	0.936888	1.37522e-05	7 factor
minimum_spo2	minimum_spo2	0.050825	0.0191955	0.678551	0.265916	0.678551	0.00810285	7 factor
relativeAmplitude	relativeAmplitude	0.000195942	0.00645996	0.0152814	0.527084	0.0152814	0.975802	7 factor
sleep_apnea	sleep_apnea	0.0509781	0.0219945	0.724137	0.323562	0.724137	0.0204621	7 factor

## Sheet: Supplementary Table 6
	chisq	df	AIC	CFI	SRMR
5 Factor	2106775	213	2106901	0.970394	0.13899
7 Factor	567720	206	567860	0.992024	0.132886

## Sheet: Supplementary Table 7
SNP	Chr	bp	refA	freq	b	se	p	F_stat	n	freq_geno	bJ	bJ_se	pJ	LD_r	SR_chronotype	SR_morning_person	ACC_L5_TIME	ACC_M10_TIME	ACC_SLEEP_MIDP	Region [rsID mapped to GRCh38]	ENSG_1st	Gene_Symbols
rs1776352	1	7834532	G	0.447316	-0.0166142	0.00170139	1.59012e-22	95.3567	693850	0.406907	-0.0115383	0.00185252	4.71179e-10	0.397325	rs61773390	rs17374439	0	0	0	1:7734380:7846681	ENSG00000049246	PER3
rs17374439	1	7888438	C	0.802986	-0.0217737	0.00211682	8.14793e-25	105.803	700464	0.802986	-0.0160909	0.00230485	2.92446e-12	0.00040923	rs1776352	rs1776352	0	0	0	1:7846112:7963610	ENSG00000049247	UTS2
rs17448682	1	15966713	C	0.768362	-0.0138522	0.00200981	5.48944e-12	47.5037	690734	0.768362	-0.0138202	0.00200991	6.15319e-12	-0.00173459	rs17448682	rs72645883	0	0	0	1:15940369:16026132	ENSG00000116809	SRARP;ZBTB17
rs4912140	1	20001071	T	0.212724	0.0128879	0.00208609	6.48979e-10	38.1679	681386	0.195235	0.0128618	0.00208615	7.03269e-10	-0.000103553	0	0	0	0	0	1:19978339:20093401	ENSG00000127472	PLA2G2A;PLA2G5
rs3767240	1	21163921	T	0.619054	-0.011513	0.00172681	2.60746e-11	44.4517	706185	0.619054	-0.0114682	0.00172687	3.11469e-11	0	rs3816454	rs3767240	0	0	0	1:20804792:21227320	ENSG00000075151	EIF4G3
rs12140153	1	62579891	G	0.910739	0.0214771	0.00316089	1.08592e-11	46.1671	611390	0.910739	0.0214771	0.00316101	1.08781e-11	0	rs12140153	rs12140153	0	0	0	1:62453226:62738368	ENSG00000116641	ANGPTL3;DOCK7
rs76681500	1	77713434	G	0.840275	-0.0245641	0.00234526	1.13811e-25	109.703	672633	0.840275	-0.0245641	0.00234545	1.14833e-25	0	rs7547493	rs7547493	0	0	0	1:77560021:77733426	ENSG00000036549	USP33;ZZZ3
rs114328297	1	91190854	T	0.785495	-0.0174135	0.00208013	5.69557e-17	70.0795	681112	0.785495	-0.0174068	0.00208024	5.87539e-17	-0.000589486	rs72720396	rs72720396	0	0	0	NA	NA	NA
rs11165756	1	97473587	C	0.809045	0.0131157	0.00227683	8.38753e-09	33.1835	620063	0.809045	0.0131049	0.00227689	8.6323e-09	0	rs11165756	0	0	0	0	1:97076243:97971059	ENSG00000188641	DPYD
rs17575798	1	110086451	G	0.80739	0.015475	0.00218312	1.35593e-12	50.2465	670000	0.80739	0.015475	0.0021832	1.35849e-12	0	rs17575798	rs17575798	0	0	0	1:110058875:110120700	ENSG00000156150	UBL4B;ALX3
rs11587758	1	150327106	G	0.605425	-0.0131483	0.00172411	2.41952e-14	58.158	699309	0.605425	-0.0131483	0.00172418	2.42537e-14	0	rs11587758	rs11587758	0	0	0	1:150271479:150354728	ENSG00000117360	RPRD2;PRPF3
rs79486846	1	174255803	T	0.968897	-0.027925	0.00462288	1.53538e-09	36.4889	771080	0.968897	-0.0281152	0.00462313	1.19129e-09	0.00833781	rs75650221	rs75650221	0	0	0	1:174109414:174996808	ENSG00000152061	RABGAP1L
rs975025	1	179338327	C	0.923015	0.0178547	0.00319911	2.38927e-08	31.1492	682860	0.923015	0.0181202	0.00319929	1.48049e-08	-0.00280758	0	0	0	0	0	1:179243714:179360180	ENSG00000057252	AXDND1;SOAT1
rs1144566	1	182569626	T	0.021869	0.0731435	0.00538722	5.46677e-42	184.341	799778	0.0302076	0.0732147	0.00538786	4.66517e-42	0	rs509476	rs1144566	rs1144566	0	0	NA	NA	NA
rs10196909	2	4651199	C	0.476143	0.0121608	0.0016903	6.27073e-13	51.7603	696811	0.48131	0.0121608	0.00169036	6.28278e-13	0	rs13011556	rs10196909	0	0	0	NA	NA	NA
rs848553	2	36699978	G	0.494036	-0.00986166	0.00168247	4.58969e-09	34.3562	701826	0.487263	-0.00985065	0.00168251	4.7781e-09	0.000881385	rs848552	0	0	0	0	2:36646690:36816294	ENSG00000205221	VIT
rs13403127	2	44717071	A	0.39165	-0.0129985	0.00173485	6.75476e-14	56.1387	692489	0.365444	-0.0129622	0.00173494	7.94046e-14	0.00137855	rs786406	rs75120545	0	0	0	2:44311904:44774092	ENSG00000143919	CAMKMT
rs12713014	2	48986474	A	0.943844	0.0204006	0.0031972	1.7619e-10	40.7142	916577	0.943844	0.0201001	0.00319805	3.27602e-10	0.00389793	0	0	0	0	0	2:48864935:49204527	ENSG00000170820	FSHR
rs10495976	2	49750698	A	0.610869	-0.0111208	0.00173	1.29115e-10	41.3219	698012	0.610869	-0.0108266	0.0017306	3.94975e-10	0.0240671	rs10495976	0	0	0	0	NA	NA	NA
rs17463545	2	50491989	C	0.920452	-0.0186108	0.0031208	2.46944e-09	35.563	696372	0.920452	-0.017727	0.00312252	1.36958e-08	0.00167116	0	rs7602425	0	0	0	2:49917005:51082536	ENSG00000179915	NRXN1
rs11125505	2	53742968	T	0.602451	0.0103514	0.00172422	1.93101e-09	36.0423	697439	0.602451	0.0103231	0.00172428	2.13888e-09	-0.000114098	0	0	0	0	0	2:53668480:53837009	ENSG00000115239	ASB3;GPR75-ASB3;ERLEC1;CHAC2
rs812925	2	61680993	C	0.649079	-0.0114155	0.0017535	7.50942e-11	42.3817	709054	0.649079	-0.0113832	0.00175356	8.50036e-11	-0.00240142	rs812925	rs778147	0	0	0	NA	NA	NA
rs113851554	2	66750564	G	0.949113	0.0282172	0.00376257	6.40889e-14	56.2417	726270	0.949113	0.0281614	0.00376272	7.1918e-14	9.94765e-05	rs113851554	0	rs113851554	0	0	NA	NA	NA
rs6744983	2	76346385	G	0.622364	-0.0109328	0.00175956	5.1857e-10	38.606	682453	0.622364	-0.0106894	0.00175989	1.24837e-09	-0.0179264	0	0	0	0	0	NA	NA	NA
rs1446712	2	77203168	T	0.424453	0.013573	0.00170372	1.63046e-15	63.4681	700288	0.57764	0.0133898	0.00170407	3.91721e-15	0	rs10520176	rs10520176	0	0	0	2:76745957:77572376	ENSG00000176204	LRRTM4
rs17824247	2	144152539	T	0.422465	0.0105622	0.00171358	7.10231e-10	37.9927	693144	0.590474	0.0105622	0.00171363	7.1097e-10	0	rs28380327	rs28380327	0	0	0	2:143944287:144382534	ENSG00000121964	GTDC1
rs4417706	2	198944655	A	0.478131	-0.0114246	0.00168533	1.21134e-11	45.9528	700678	0.517211	-0.0114061	0.00168539	1.30917e-11	0.00202485	rs1064213	rs11679484	0	0	0	NA	NA	NA
rs190572876	2	206972042	G	0.941848	-0.0210951	0.00373293	1.59449e-08	31.9347	650667	0.941848	-0.0210458	0.00373303	1.72314e-08	0	rs184033703	rs184033703	0	0	0	2:206829383:206972564	ENSG00000144410	CPO
rs62194932	2	239137616	G	0.868213	0.0163892	0.00251585	7.29931e-11	42.4371	685692	0.868213	0.0178679	0.00252685	1.53576e-12	-0.048759	rs57435966	rs77008212	0	0	0	2:239046668:239451647	ENSG00000068024	HDAC4
rs80261926	2	239152870	C	0.98276	-0.0427117	0.00595794	7.56219e-13	51.3927	825698	0.98276	-0.038531	0.00596869	1.0784e-10	-0.0387626	rs62194932	rs62194932	0	0	0	NA	NA	NA
rs57435966	2	239311369	C	0.912495	0.0324576	0.00297681	1.10946e-27	118.886	701756	0.912495	0.0333433	0.002989	6.74291e-29	0.0069702	rs80261926	rs80261926	0	0	0	NA	NA	NA
rs62182135	2	240267305	C	0.668608	0.0100398	0.00179406	2.19189e-08	31.3167	696334	0.668608	0.00988631	0.00179417	3.58312e-08	0	0	0	0	0	0	NA	NA	NA
rs6442446	3	14394752	A	0.28827	0.0104329	0.00186085	2.06449e-08	31.4331	698987	0.288103	0.0104421	0.00186089	2.00766e-08	-0.000746072	0	0	0	0	0	3:14352576:14490849	ENSG00000131389	SLC6A6
rs4688917	3	18174160	A	0.470179	0.0112679	0.00169507	2.98236e-11	44.1886	693795	0.442191	0.0112994	0.00169512	2.6323e-11	0.00201316	rs6577620	rs9853258	0	0	0	3:17912572:18270422	NA	NA
rs13059636	3	24935790	A	0.432406	-0.0122017	0.00170186	7.519e-13	51.4035	698580	0.527257	-0.0122245	0.00170193	6.83231e-13	0	rs13059636	rs13059636	0	0	0	NA	NA	NA
rs62261468	3	48586195	C	0.930212	-0.0226004	0.00336238	1.79824e-11	45.1792	676612	0.930212	-0.021733	0.00336577	1.06757e-10	0.044453	0	0	0	0	0	3:48560218:48613768	ENSG00000145040	COL7A1;PFKFB4;UCN2
rs2859580	3	50194644	G	0.128231	-0.0158375	0.0025822	8.60578e-10	37.6178	666233	0.113006	-0.0151013	0.00258479	5.14641e-09	0	rs11712056	rs11712056	0	0	0	3:50141610:50199196	ENSG00000114349	SLC38A3;GNAI2;GNAT1
rs60194061	3	77301121	G	0.732407	-0.0122742	0.0019009	1.06774e-10	41.6935	701216	0.732407	-0.0123182	0.00190098	9.17496e-11	0.00423794	rs11924337	rs60194061	0	0	0	3:75856675:77651464	ENSG00000185008	ROBO2
rs957501	3	85791657	T	0.333996	0.00970919	0.00178471	5.32207e-08	29.5958	700895	0.334549	0.00975819	0.00178476	4.56438e-08	0	rs957501	rs957501	0	0	0	3:84908982:86075929	ENSG00000175161	CADM2
rs1800828	3	113891549	C	0.746636	0.010915	0.00197406	3.21646e-08	30.5722	673643	0.746636	0.010915	0.00197411	3.21869e-08	0	rs1800828	0	0	0	0	3:113778182:113948674	ENSG00000178075	GRAMD1C
rs7641938	3	133005198	A	0.711947	0.0110595	0.00187135	3.42364e-09	34.927	691469	0.711947	0.0110595	0.0018714	3.42665e-09	0	rs13065394	rs13065394	0	0	0	3:132988288:133399275	ENSG00000144868	TMEM108
rs2102506	3	156342849	G	0.358847	0.0098703	0.00176045	2.06224e-08	31.435	696448	0.358025	0.0098703	0.00176049	2.0637e-08	0	0	rs2102506	0	0	0	3:156070548:156540638	ENSG00000169282	KCNAB1
rs3850174	3	172364093	T	0.746719	0.01239	0.0019719	3.31565e-10	39.4796	675256	0.746719	0.01239	0.00197196	3.31947e-10	0	rs3850174	rs3850174	0	0	0	3:171989628:172402203	ENSG00000075420	FNDC3B
rs2268829	3	185989567	G	0.199801	0.0148729	0.00207921	8.4803e-13	51.1675	718459	0.214102	0.01429	0.00208133	6.61256e-12	-0.0448043	rs2239626	rs2239626	0	0	0	NA	NA	NA
rs112936817	3	186079623	G	0.88867	-0.0173376	0.00261709	3.47826e-11	43.8875	732842	0.88867	-0.0165396	0.00261974	2.72873e-10	0	rs2268829	rs2268829	0	0	0	3:186044817:186159112	ENSG00000244405	ETV5
rs1990689	4	62918377	A	0.293241	-0.0103513	0.00184789	2.12314e-08	31.3789	701708	0.297047	-0.0103513	0.00184793	2.12462e-08	0	rs28634184	rs17292170	0	0	0	NA	NA	NA
rs13112524	4	83230583	G	0.779597	0.0133906	0.00202902	4.12472e-11	43.5539	702000	0.779597	0.0133906	0.00202908	4.13029e-11	0	rs7691121	rs7691121	0	0	0	4:83137101:83335089	ENSG00000173085	COQ2
rs4241964	4	137053959	T	0.487078	-0.0116217	0.00169377	6.81546e-12	47.0793	692848	0.525544	-0.0116217	0.00169383	6.82635e-12	0	rs4241964	rs4241964	0	0	0	NA	NA	NA
rs10067113	5	26016363	C	0.341948	-0.0110633	0.00176385	3.5584e-10	39.3411	709348	0.378707	-0.0110577	0.0017639	3.63607e-10	-0.000586867	rs10067113	rs10067113	0	0	0	NA	NA	NA
rs6863018	5	35228753	G	0.309145	0.0101054	0.00183361	3.56427e-08	30.3734	691580	0.300583	0.0100987	0.00183365	3.64103e-08	0	rs10058356	0	0	0	0	5:35047256:35280589	ENSG00000113494	PRLR
rs7701529	5	63861475	A	0.214712	-0.0110953	0.00202112	4.02619e-08	30.1366	721008	0.234975	-0.0110953	0.00202116	4.02872e-08	0	rs7701529	rs7701529	0	0	0	NA	NA	NA
rs4916907	5	87659980	T	0.747216	0.0120855	0.00194362	5.0339e-10	38.664	695958	0.747216	0.0120855	0.00194367	5.0393e-10	0	0	0	0	0	0	NA	NA	NA
rs1592757	5	103889998	G	0.644048	-0.00961312	0.00176296	4.9575e-08	29.7333	696967	0.644048	-0.00961312	0.001763	4.96063e-08	0	rs1976423	rs1976423	0	0	0	NA	NA	NA
rs75750671	5	115906076	C	0.774653	0.0112948	0.00203565	2.88101e-08	30.7858	686502	0.774653	0.0112948	0.00203569	2.883e-08	0	rs1027742	rs1027742	0	0	0	5:115904903:116029106	ENSG00000172901	AP3S1;LVRN
rs2910032	5	152540354	C	0.462227	-0.0127116	0.00169235	5.85922e-14	56.4183	697519	0.482002	-0.0127116	0.00169242	5.8726e-14	0	rs4246036	rs2910032	0	0	0	NA	NA	NA
rs9349501	6	13191924	A	0.694052	-0.0145464	0.00181552	1.12651e-15	64.1961	709486	0.694052	-0.0145464	0.0018156	1.12978e-15	0	rs9395520	rs9369915	0	0	0	6:12666606:13291744	ENSG00000112137	PHACTR1
rs9381086	6	41580073	G	0.413519	0.0108316	0.00171812	2.8944e-10	39.7446	693658	0.602094	0.0108471	0.00171817	2.73368e-10	0.00161013	rs4714475	rs2842638	0	0	0	6:41496426:41603884	ENSG00000137166	FOXP4
rs6904450	6	50921602	A	0.819539	-0.0125078	0.00220906	1.4956e-08	32.0588	688079	0.819539	-0.0124357	0.00220914	1.8102e-08	-0.00139727	0	0	0	0	0	NA	NA	NA
rs2653349	6	55142337	A	0.183897	0.0240757	0.00211461	4.9453e-30	129.628	739890	0.215504	0.0241871	0.00211492	2.75022e-30	0.0110623	rs2653349	rs2653343	0	0	0	6:55124273:55284120	ENSG00000137252	HCRTR2
rs9476307	6	57749349	A	0.589186	-0.00956329	0.00172417	2.91256e-08	30.7648	690160	0.589186	-0.00972693	0.00172432	1.69055e-08	0	0	0	0	0	0	NA	NA	NA
rs60616179	6	110244765	A	0.946439	0.0239743	0.00367383	6.76851e-11	42.5847	725805	0.946439	0.0239743	0.00367394	6.77695e-11	0	rs60616179	rs60616179	0	0	0	6:110244446:110408272	ENSG00000053328	METTL24
rs75284686	6	153105795	C	0.98988	-0.0581313	0.00754215	1.28278e-14	59.4059	871450	0.98988	-0.0505088	0.0076049	3.10284e-11	0.142925	rs827749	rs520954	0	0	0	6:153009323:153181254	ENSG00000091844	RGS17
rs598779	6	153132827	A	0.674026	-0.0157531	0.00179902	2.0148e-18	76.6761	698304	0.674026	-0.0142116	0.00181403	4.71478e-15	0	rs75284686	rs75284686	0	0	0	NA	NA	NA
rs12525312	6	165236239	T	0.417495	0.00952444	0.00170559	2.34729e-08	31.1838	701947	0.450595	0.00952444	0.00170563	2.34891e-08	0	0	rs9365769	0	0	0	NA	NA	NA
rs10280205	7	24082063	T	0.692467	0.0105272	0.0018213	7.46696e-09	33.4089	702996	0.692467	0.0105448	0.00182134	7.05607e-09	0.00147374	rs10280205	rs1469171	0	0	0	NA	NA	NA
rs180904590	7	29723373	C	0.84907	-0.0128254	0.00232658	3.53657e-08	30.3883	715902	0.84907	-0.0128651	0.00232663	3.21172e-08	-0.000188078	0	0	0	0	0	7:29670497:29744104	NA	NA
rs12669911	7	32262377	A	0.369781	-0.0120308	0.00174362	5.20472e-12	47.6086	700902	0.38373	-0.012391	0.00174461	1.22574e-12	0.0327481	rs17161045	rs12669911	0	0	0	7:31615277:32349404	ENSG00000154678	PDE1C
rs3956705	7	32953295	C	0.62697	0.0104585	0.00174614	2.1047e-09	35.8741	696394	0.62697	0.0108728	0.00174712	4.86759e-10	0	0	0	0	0	0	7:32907404:33008431	ENSG00000122642	FKBP9
rs11575356	7	50594821	T	0.492048	-0.0108644	0.00168936	1.26727e-10	41.3587	696185	0.475137	-0.0108644	0.00168941	1.26883e-10	0	rs6967481	rs6967481	0	0	0	7:50588563:50843462	ENSG00000106070	DDC;GRB10
rs2968511	7	71810805	C	0.695258	-0.011012	0.00180581	1.07356e-09	37.1868	718753	0.695258	-0.011012	0.00180586	1.07459e-09	0	rs2968511	0	0	0	0	7:71777991:72497151	ENSG00000183166	CALN1
rs4729303	7	96474878	C	0.194831	-0.0171638	0.0021466	1.28739e-15	63.9329	686971	0.186524	-0.0171732	0.00214671	1.24617e-15	0.000569578	rs4729303	rs4729303	0	0	0	NA	NA	NA
rs202157	7	101637753	C	0.301193	0.0157911	0.00184492	1.13606e-17	73.2605	693144	0.298037	0.01371	0.00185365	1.40095e-13	-0.074277	0	0	0	0	0	7:101611825:101679296	ENSG00000106436	MYL10
rs6960360	7	102083232	A	0.38171	-0.0101721	0.00173324	4.38922e-09	34.4432	700423	0.398723	-0.00988123	0.00174574	1.51196e-08	0.0741837	rs4729854	rs4729854	0	0	0	7:101765904:102285458	ENSG00000257923	CUX1
rs4729854	7	102383663	T	0.485089	0.0173174	0.00170681	3.45035e-24	102.943	682394	0.517471	0.0165714	0.00171954	5.57419e-22	-0.0894038	rs6960360	rs6960360	0	0	0	7:102383530:102458321	ENSG00000160991	SPDYE6;PRKRIP1;ORAI2
rs76187115	7	102524835	T	0.980518	-0.0405179	0.00531723	2.53438e-14	58.0661	919470	0.980518	-0.033646	0.00534387	3.05066e-10	0	rs4729854	rs4729854	0	0	0	7:102519671:102622660	ENSG00000285437	RASA4B;SPDYE2;POLR2J;POLR2J3
rs9649368	7	114143651	T	0.439364	-0.00993564	0.00169397	4.48323e-09	34.4017	702567	0.504333	-0.00993564	0.00169401	4.487e-09	0	0	0	0	0	0	7:114036310:114695272	ENSG00000128573	FOXP2
rs7835197	8	31982676	T	0.089463	-0.0158208	0.00278453	1.33386e-08	32.2815	786255	0.114874	-0.0152882	0.00278565	4.06061e-08	0.0293024	0	0	0	0	0	8:31589304:32769457	ENSG00000157168	NRG1
rs4733462	8	33679904	A	0.434394	-0.0120262	0.00170017	1.50995e-12	50.0348	699220	0.566461	-0.0117683	0.00170088	4.54946e-12	0	rs12541362	rs7001604	0	0	0	NA	NA	NA
rs11988076	8	53128629	A	0.835966	-0.0125679	0.00218297	8.54853e-09	33.1459	759958	0.835966	-0.0125679	0.00218301	8.5547e-09	0	rs769066	rs769066	0	0	0	NA	NA	NA
rs4321976	8	76614958	T	0.779543	0.0151207	0.00207566	3.22225e-13	53.0678	670682	0.779543	0.0151207	0.00207574	3.22902e-13	0	rs4321976	rs4321976	0	0	0	NA	NA	NA
rs1901362	8	101959609	G	0.489066	0.00936712	0.00168435	2.67843e-08	30.9277	700499	0.485526	0.00936712	0.00168439	2.68025e-08	0	rs3100052	rs1470764	0	0	0	8:101685042:102174907	ENSG00000104490	NCALD
rs17716502	8	116659731	C	0.796747	-0.0149563	0.00219514	9.53466e-12	46.422	636370	0.796747	-0.0149563	0.00219522	9.55079e-12	0	rs3808477	rs12682033	0	0	0	8:116643316:116805823	ENSG00000147677	EIF3H
rs10977117	9	8451755	T	0.460239	-0.00961607	0.00169199	1.32137e-08	32.2998	698269	0.533806	-0.00961607	0.00169203	1.32235e-08	0	rs6477309	rs10976942	0	0	0	9:8312746:10662723	ENSG00000153707	PTPRD
rs6476622	9	37308049	T	0.624563	0.0111891	0.00174843	1.55877e-10	40.9538	692774	0.624563	0.0111891	0.00174848	1.56065e-10	0	rs308521	rs308521	0	0	0	9:37070169:37359649	ENSG00000147905	ZCCHC7
rs62553781	9	76679777	C	0.96517	0.0319956	0.00506954	2.76623e-10	39.833	574779	0.96517	0.0320467	0.00506972	2.59544e-10	0.00182573	rs62553781	rs62553781	0	0	0	9:76609876:76956220	ENSG00000106772	PRUNE2
rs295268	9	86429305	T	0.744487	-0.0117415	0.0018989	6.27663e-10	38.2334	723986	0.744487	-0.011761	0.00189895	5.88658e-10	0	rs295268	rs295268	0	0	0	NA	NA	NA
rs10818834	9	126317324	T	0.73523	0.010448	0.00188864	3.16609e-08	30.6033	715178	0.73523	0.010484	0.00188869	2.84126e-08	-0.00332088	rs10818834	rs10818834	0	0	0	9:126276844:126508541	ENSG00000196814	MVB12B
rs10988239	9	131943440	C	0.465209	0.00990485	0.00169897	5.54508e-09	33.9879	691516	0.487323	0.00993565	0.00169902	4.9786e-09	0	rs10988239	rs10988246	0	0	0	9:131858610:132129887	ENSG00000160563	MED27
rs4948547	10	60568514	C	0.296223	0.0106395	0.00188689	1.71411e-08	31.7943	669050	0.255773	0.0106395	0.00188693	1.71541e-08	0	rs4948547	rs2893787	0	0	0	10:60024798:60783526	ENSG00000151150	ANK3
rs7927904	11	16622650	G	0.804872	0.0118645	0.00215479	3.6688e-08	30.3172	681001	0.804872	0.0118645	0.00215484	3.67127e-08	0	rs72632979	rs72632979	0	0	0	NA	NA	NA
rs10501087	11	27670108	T	0.799164	-0.0127753	0.00206594	6.25861e-10	38.239	724921	0.799164	-0.0126378	0.00206604	9.54095e-10	0.00629633	rs10742179	rs10501087	0	0	0	11:27653393:27772058	ENSG00000176697	BDNF
rs640245	11	30393360	C	0.452286	-0.0114594	0.00169598	1.41066e-11	45.6544	696929	0.516269	-0.0113917	0.00169607	1.86129e-11	0.00027226	0	0	0	0	0	11:30382993:30636714	ENSG00000066382	NA;MPPED2
rs1402954	11	33777334	C	0.90961	-0.0237255	0.00291169	3.68866e-16	66.3958	712392	0.90961	-0.0236652	0.00291184	4.39118e-16	0	rs11032362	rs11032362	0	0	0	11:33701510:33786479	ENSG00000085063	FBXO3;CD59
rs12787765	11	58400686	G	0.759659	0.0123179	0.00196239	3.45132e-10	39.4006	706293	0.759659	0.0122847	0.00196245	3.85271e-10	-0.00300581	rs3168135	rs11229543	0	0	0	11:58356625:58409069	ENSG00000197786	OR5B17
rs7948839	11	66634397	C	0.710251	-0.0106709	0.00186787	1.1109e-08	32.6369	691637	0.710251	-0.0106361	0.00186792	1.24032e-08	0	0	0	0	0	0	11:66588617:66669885	ENSG00000173933	RBM14-RBM4;CCDC87;RBM4
rs4936291	11	114009982	A	0.617998	-0.0100566	0.00176277	1.16355e-08	32.547	676958	0.617998	-0.0100727	0.00176281	1.10349e-08	0.00166571	rs4936291	rs4936291	0	0	0	11:114009579:114252176	ENSG00000109906	ZBTB16
rs73606722	11	122816601	T	0.877644	0.0145255	0.00262961	3.31683e-08	30.5126	668773	0.877644	0.0145504	0.00262967	3.14506e-08	0	rs74357745	rs73606718	0	0	0	11:122788431:122874143	ENSG00000109943	CRTAM
rs35935113	12	24068708	T	0.425447	0.0105503	0.00170407	5.96963e-10	38.3314	699603	0.552206	0.0105503	0.00170411	5.97589e-10	0	rs12811046	rs7302062	0	0	0	12:23527995:24612669	ENSG00000134532	SOX5
rs12427164	12	38868777	A	0.476143	0.0188953	0.0016988	9.7225e-29	123.715	689783	0.547842	0.0188953	0.00169895	9.83092e-29	0	rs7313852	rs7313852	rs4882315	rs4402370	0	12:38650700:38956135	ENSG00000139117	CPNE8
rs55947153	12	54683639	T	0.588867	0.0109661	0.00172745	2.17933e-10	40.2989	687370	0.588867	0.0109068	0.00172752	2.72627e-10	0.00493244	rs55947153	rs11834788	0	0	0	12:54629339:54684879	ENSG00000135413	DCD;LACRT
rs11174781	12	63516126	T	0.878681	0.0186749	0.00263869	1.46974e-12	50.0887	669045	0.878681	0.0185938	0.00263882	1.83806e-12	0	rs77384811	rs11174781	0	0	0	NA	NA	NA
rs4408360	12	90394861	A	0.416501	-0.0117318	0.00170757	6.39905e-12	47.2033	700780	0.582717	-0.0117318	0.00170763	6.40922e-12	0	rs7959983	rs7959983	0	0	0	NA	NA	NA
rs4964472	12	106986593	C	0.293241	-0.0101807	0.00183024	2.65945e-08	30.9413	715309	0.31818	-0.0101807	0.00183028	2.66122e-08	0	rs7304278	rs7304278	0	0	0	12:106975791:107037166	ENSG00000120832	MTERF2
rs80097534	12	121029604	G	0.905172	0.0156045	0.00279983	2.49846e-08	31.0625	738033	0.905172	0.0156045	0.00279989	2.50009e-08	0	rs80097534	0	0	0	0	12:121018792:121089242	ENSG00000135114	C12orf43;OASL
rs9597241	13	56281271	A	0.811761	0.013015	0.0022225	4.74128e-09	34.2929	657933	0.811761	0.013015	0.00222256	4.74551e-09	0	rs9597250	rs9597241	0	0	0	NA	NA	NA
rs7987664	13	77566158	A	0.965587	0.0408291	0.00449119	9.82087e-20	82.645	740866	0.965587	0.0408291	0.00449144	9.86622e-20	0	rs9573971	rs9573971	0	0	0	13:77485674:77646763	ENSG00000136155	SCEL
rs10508005	13	94105666	A	0.745742	0.0110329	0.0019357	1.19999e-08	32.4865	698984	0.745742	0.0110329	0.00193574	1.20089e-08	0	rs17267683	rs11841335	0	0	0	13:93176825:94409520	ENSG00000183098	GPC6
rs11624703	14	74269778	G	0.6251	0.0099249	0.00175173	1.46373e-08	32.101	690565	0.6251	0.0099249	0.00175177	1.46482e-08	0	rs7148842	0	0	0	0	14:74253076:74361508	ENSG00000133980	VRTN
rs7144406	14	98659847	A	0.792104	0.0116935	0.00208229	1.95794e-08	31.536	695497	0.792104	0.0116822	0.00208234	2.02158e-08	-0.000946508	0	0	0	0	0	NA	NA	NA
rs12432176	14	101021218	C	0.621758	-0.00996353	0.00174006	1.02835e-08	32.7867	697409	0.621758	-0.0099543	0.0017401	1.0618e-08	0	rs12432176	0	0	0	0	NA	NA	NA
rs59986227	15	48009263	C	0.74482	-0.0110008	0.00193857	1.38942e-08	32.2022	695255	0.74482	-0.0110008	0.00193861	1.39045e-08	0	rs59986227	0	0	0	0	NA	NA	NA
rs7203707	16	24518569	C	0.451292	0.0101844	0.00169645	1.93279e-09	36.0403	696821	0.484442	0.0101844	0.00169649	1.93459e-09	0	rs9932577	0	0	0	0	16:24489587:24574363	ENSG00000122257	RBBP6
rs12927162	16	52684916	A	0.721783	0.0194405	0.00190994	2.47139e-24	103.604	677843	0.721783	0.0194893	0.00191009	1.91547e-24	0.00184171	0	rs12927162	rs12927162	0	0	NA	NA	NA
rs7187250	16	53810546	C	0.414513	-0.0155262	0.0017211	1.8625e-19	81.3801	690725	0.606502	-0.0154956	0.00172122	2.20205e-19	-0.00350109	rs1421085	0	0	0	0	16:53653963:54115967	ENSG00000140718	FTO
rs2550298	16	56367969	C	0.623197	0.0136637	0.00173193	3.03897e-15	62.2409	704996	0.623197	0.013604	0.00173202	4.01603e-15	-0.000752216	0	0	0	0	0	16:56359952:56475538	ENSG00000159461	AMFR
rs62046252	16	60639941	T	0.633159	-0.0115992	0.00175956	4.33668e-11	43.4558	690555	0.633159	-0.0115884	0.00175962	4.52638e-11	0	rs8063159	rs8063159	0	0	0	NA	NA	NA
rs17604349	16	72210865	G	0.822568	0.0164373	0.00222178	1.38018e-13	54.7342	689261	0.822568	0.0164373	0.00222187	1.38318e-13	0	rs17604349	rs11645898	0	0	0	16:72115198:72227002	ENSG00000118557	PMFBP1
rs2585405	17	8046772	C	0.10835	0.0238657	0.0028274	3.14985e-17	71.2482	642953	0.0865438	0.0238493	0.00282756	3.32351e-17	0.000837928	rs2518022	rs2518022	0	0	0	17:7989040:8050634	ENSG00000179593	ALOX15B
rs3760185	17	17401736	C	0.755681	0.0141977	0.00199058	9.85948e-13	50.8718	678795	0.755681	0.014184	0.00199065	1.03846e-12	0	rs3760185	rs3760185	0	0	0	NA	NA	NA
rs72829936	17	34060115	G	0.837848	-0.012099	0.00220655	4.1758e-08	30.0657	750748	0.837848	-0.012099	0.00220659	4.17831e-08	0	rs226090	rs72829936	0	0	0	17:33011587:34206806	ENSG00000108684	ASIC2
rs6503455	17	44140748	C	0.605007	0.00914754	0.00174589	1.61029e-07	27.4521	681751	0.605007	0.00976788	0.00174876	2.32911e-08	-0.0576425	0	0	0	0	0	17:44120706:44180583	ENSG00000161664	HROB;TMUB2;ASB16
rs35653190	17	46077967	C	0.773991	0.0117652	0.0020181	5.54741e-09	33.987	697043	0.773991	0.0124383	0.00202143	7.5931e-10	0.00109441	0	rs35653190	0	0	0	17:46028416:46275374	ENSG00000120071	KANSL1
rs2202237	17	50208784	C	0.456262	-0.00995402	0.0016981	4.57762e-09	34.3614	694178	0.469175	-0.00993736	0.00169816	4.86156e-09	-0.00403004	rs28647842	0	0	0	0	17:50182596:50251648	ENSG00000108821	COL1A1
rs72829713	17	54179517	A	0.961364	0.0222874	0.00400669	2.65877e-08	30.9419	832834	0.961364	0.0221418	0.00400682	3.27583e-08	-0.00452125	0	0	0	0	0	NA	NA	NA
rs17760257	17	61408080	C	0.809448	-0.0127553	0.00217394	4.42827e-09	34.426	681249	0.809448	-0.0127283	0.00217402	4.77805e-09	-0.00177675	0	0	0	0	0	17:61394626:61486610	ENSG00000121075	LOC101927855;LINC02875;TBX2;TBX4
rs2949919	17	65470954	A	0.418489	-0.00989577	0.00171396	7.75807e-09	33.3348	694642	0.566249	-0.00991343	0.001714	7.30359e-09	0	rs2949923	rs2949923	0	0	0	NA	NA	NA
rs1595675	18	1817188	A	0.766972	0.0108931	0.00198286	3.93763e-08	30.18	706703	0.766972	0.0108756	0.0019829	4.14229e-08	-0.00121737	0	0	0	0	0	NA	NA	NA
rs11659500	18	5181709	C	0.809337	-0.0154987	0.0020682	6.68972e-14	56.1572	752336	0.809337	-0.0154853	0.00206828	7.04284e-14	0	rs62082401	rs62082401	0	0	0	18:5142173:5248203	ENSG00000231824	AKAIN1
rs11083105	18	22618399	A	0.398608	-0.0116083	0.00172745	1.81841e-11	45.1571	694198	0.404477	-0.0116192	0.0017275	1.74371e-11	0.000864267	rs10460095	rs1013987	0	0	0	NA	NA	NA
rs4239386	18	31664710	T	0.665905	0.0131693	0.00177085	1.03209e-13	55.3047	711782	0.665905	0.0131247	0.00177093	1.25182e-13	-0.00372791	rs4239386	rs4239386	0	0	0	18:31620746:31775286	ENSG00000118276	B4GALT6
rs12969848	18	38152835	C	0.492048	-0.014292	0.00169297	3.12078e-17	71.2668	693187	0.470008	-0.0142458	0.00169307	3.95574e-17	0	rs12969848	rs12969848	0	0	0	NA	NA	NA
rs8090894	18	56810920	G	0.719542	0.0152833	0.00189009	6.16351e-16	65.3837	688803	0.719542	0.0152406	0.00189019	7.44464e-16	-0.0041418	rs9964420	rs9964420	0	0	0	18:56601343:57031305	ENSG00000091157	WDR7
rs695059	18	60264354	A	0.421471	-0.00943931	0.00171729	3.87083e-08	30.213	690604	0.406819	-0.00938203	0.00171734	4.67809e-08	0	0	0	0	0	0	NA	NA	NA
rs11698484	20	17368381	C	0.924485	0.0183342	0.00312621	4.50041e-09	34.3944	727838	0.924485	0.0183342	0.00312628	4.50406e-09	0	rs6131942	0	0	0	0	20:17176107:17486078	ENSG00000125851	PCSK2
rs2425674	20	43529461	C	0.4334	0.00995631	0.00170461	5.19463e-09	34.1151	695967	0.436178	0.00995631	0.00170465	5.19897e-09	0	rs2072727	rs2072727	0	0	0	20:43457680:43543395	ENSG00000185513	SGK2;L3MBTL1
rs139911	22	40704052	C	0.460239	0.0144071	0.00169899	2.25639e-17	71.9071	692487	0.422698	0.0144209	0.00169908	2.11233e-17	-0.00148694	rs139911	rs139911	0	0	0	NA	NA	NA
rs1056322	22	45736434	C	0.681607	0.00990047	0.00178516	2.9233e-08	30.7579	718047	0.681607	0.00992259	0.0017852	2.72505e-08	0	0	0	0	0	0	22:45621798:45846807	ENSG00000130638	ATXN10

## Sheet: Supplementary Table 8
SNP	Chr	bp	refA	freq	b	se	p	F-stat	n	freq_geno	bJ	bJ_se	pJ	LD_r	relativeAmplitude	ACC_SLEEP_DUR_SD	Region [rsID mapped to GRCh38]	ENSG	Gene_Symbols
rs2244401	1	11590776	T	0.797962	-0.162693	0.0334933	1.18887e-06	23.5951	2732.68	0.797962	-0.162693	0.0336315	1.31466e-06	0	0	rs2235666	NA	NA	NA
rs4854410	2	860333	G	0.738172	-0.134988	0.0281166	1.57878e-06	23.0497	3239.29	0.738172	-0.134988	0.0282121	1.71209e-06	0	0	0	NA	NA	NA
rs3768655	2	152714023	T	0.909043	-0.176654	0.0399986	1.00314e-05	19.5055	3748.39	0.909043	-0.177129	0.0400974	9.98676e-06	-0.00260325	0	0	2:152667893:152762753	ENSG00000177917	PRPF40A;ARL6IP6
rs116036180	2	157035194	A	0.981223	-0.395366	0.0857988	4.06437e-06	21.2342	3653.76	0.981223	-0.396343	0.0860364	4.0912e-06	0	0	0	NA	NA	NA
rs4974444	3	127280969	G	0.095427	-0.220452	0.0428227	2.63242e-07	26.5021	3122.48	0.112401	-0.220452	0.0429972	2.94191e-07	0	0	0	NA	NA	NA
rs77732322	4	135456597	A	0.961586	0.295175	0.0657592	7.16523e-06	20.1487	3100.49	0.961586	0.295175	0.065962	7.64389e-06	0	0	rs72726805	NA	NA	NA
rs10062966	5	163162578	A	0.987443	-0.432368	0.0899361	1.52829e-06	23.1121	4946.43	0.987443	-0.432368	0.0901369	1.61228e-06	0	0	0	NA	NA	NA
rs6909467	6	20533162	T	0.280318	-0.140263	0.0280088	5.50521e-07	25.0783	3124.5	0.315254	-0.140263	0.0281165	6.08097e-07	0	0	rs144623561	6:20484457:21233904	ENSG00000145996	CDKAL1
rs112746216	7	97666105	C	0.923718	-0.211068	0.0450603	2.81163e-06	21.941	3461.99	0.923718	-0.211068	0.0451964	3.01173e-06	0	rs146314842	0	NA	NA	NA
rs12722549	10	6071808	C	0.975954	-0.328976	0.0725643	5.7992e-06	20.5533	4012.97	0.975954	-0.328976	0.0727409	6.10915e-06	0	0	0	10:6038986:6118959	ENSG00000134453	IL2RA;RBM17
rs61878493	11	3650897	T	0.759413	-0.126805	0.0285603	8.99957e-06	19.7128	3324.92	0.759413	-0.126805	0.0286406	9.53447e-06	0	0	0	11:3637006:3692316	ENSG00000167311	ART5
rs12885018	14	104273812	A	0.588336	-0.116528	0.0257814	6.18787e-06	20.429	3075.95	0.588336	-0.116528	0.0258627	6.61673e-06	0	14:104258535_GTGTA_G	0	NA	NA	NA
rs73497290	16	964212	C	0.914029	-0.189807	0.0418856	5.85504e-06	20.535	3595	0.914029	-0.189807	0.0419993	6.20458e-06	0	0	0	16:852134:1031318	ENSG00000103227	SOX8;LMF1

## Sheet: Supplementary Table 9
SNP	Chr	bp	refA	freq	b	se	p	F_stat	n	freq_geno	bJ	bJ_se	pJ	LD_r	SR_SleepDuration	ACC_SLEEP_DUR_RAW	SR_LongSleep	SR_ShortSleep	Region [rsID mapped to GRCh38]	ENSG	Gene_Symbols
rs1578650	1	34747932	A	0.264414	0.0158307	0.00240545	4.66788e-11	43.3119	438554	0.273757	0.0158307	0.00240557	4.67786e-11	0	rs915416	0	0	rs7524118	1:34709741:34765224	ENSG00000189433	GJA4;GJB3;GJB5;GJB4
rs540431	1	57859521	G	0.470179	-0.0122259	0.00216594	1.65532e-08	31.8617	422338	0.450939	-0.0122259	0.00216602	1.65731e-08	0	rs269054	0	0	0	1:56996406:58300539	ENSG00000173406	DAB1
rs79512144	2	9188514	G	0.935316	0.0258241	0.00437839	3.67757e-09	34.7874	425557	0.935316	0.0258241	0.00437857	3.68279e-09	0	rs62120041	0	0	0	2:9156765:9407183	ENSG00000151693	ASAP2
rs2683630	2	58058069	C	0.372763	-0.0163355	0.00222702	2.21488e-13	53.8043	425608	0.370588	-0.0152334	0.00223128	8.65835e-12	0.0612975	0	0	0	rs1380703	2:57857651:58161420	ENSG00000028116	VRK2
rs75539574	2	58871658	A	0.915721	-0.0328916	0.00384315	1.1433e-17	73.2479	432960	0.915721	-0.0312939	0.00385058	4.39828e-16	0	rs75539574	0	0	0	NA	NA	NA
rs62158170	2	114082175	A	0.786601	-0.0347428	0.00262101	4.19189e-40	175.708	427874	0.786601	-0.0347428	0.00262154	4.34581e-40	0	rs7556815	rs62158170	rs6737318	rs2863957	NA	NA	NA
rs35662245	2	147583187	T	0.662011	-0.0126379	0.0022756	2.79714e-08	30.8431	425979	0.662011	-0.0126379	0.00227568	2.80025e-08	0	rs35662245	0	0	0	NA	NA	NA
rs12463754	2	166942663	C	0.731104	-0.0139573	0.00243037	9.30787e-09	32.9806	425044	0.731104	-0.0139573	0.00243046	9.31976e-09	0	rs11885663	0	0	0	2:166838487:167261253	ENSG00000163092	XIRP2
rs112230981	3	55879269	A	0.950628	0.028726	0.0044973	1.68732e-10	40.7987	519934	0.950628	0.028726	0.00449747	1.69002e-10	0	rs112230981	0	0	0	3:55506808:56518366	ENSG00000187672	ERC2
rs6774226	3	135802156	A	0.665479	-0.0146526	0.00227834	1.26558e-10	41.3611	427110	0.665479	-0.0146526	0.00227845	1.26811e-10	0	rs13088093	0	0	0	NA	NA	NA
rs2192528	4	18327896	A	0.473161	0.0130565	0.00215656	1.41016e-09	36.6548	425728	0.479925	0.0130565	0.00215665	1.41239e-09	0	rs2192528	0	0	0	NA	NA	NA
rs7685840	4	82284575	T	0.734853	0.01337	0.00244063	4.29932e-08	30.0095	425261	0.734853	0.01337	0.00244071	4.30387e-08	0	rs17427571	0	0	rs17005118	NA	NA	NA
rs6838394	4	92585715	G	0.475149	-0.0124833	0.00216098	7.6181e-09	33.3701	423816	0.521089	-0.0124833	0.00216106	7.62809e-09	0	rs35531607	0	0	0	4:92254399:93776056	ENSG00000152208	GRID2
rs13109404	4	102896591	T	0.929798	0.0233299	0.00418209	2.42579e-08	31.12	432336	0.929798	0.0233299	0.00418224	2.4285e-08	0	rs13109404	0	0	rs13107325	4:102883548:103069739	ENSG00000164037	UBE2D3;SLC9B1
rs37021	5	1417354	A	0.486083	0.0146133	0.00217783	1.94567e-11	45.0245	416561	0.556984	0.0146384	0.00217795	1.80251e-11	-0.0020267	rs365663	0	0	0	5:1391290:1495428	ENSG00000142319	SLC6A3
rs150830	5	3121136	A	0.110338	0.0196866	0.00344555	1.10587e-08	32.6456	423523	0.108399	0.0197332	0.00344568	1.0227e-08	0	0	0	0	0	NA	NA	NA
rs6596529	5	102317042	C	0.665865	-0.0144338	0.00227345	2.16923e-10	40.3079	429199	0.665865	-0.0144338	0.00227355	2.17333e-10	0	rs56372231	0	0	rs2303653	5:102232486:102346549	ENSG00000173930	SLCO4C1
rs74838528	6	27300922	C	0.890995	-0.0189815	0.00347056	4.51873e-08	29.9131	421915	0.890995	-0.0192203	0.00347093	3.06813e-08	0.0120558	0	0	0	0	6:27262169:27316112	NA	NA
rs11965972	6	28587402	C	0.719886	0.0135901	0.00237798	1.09712e-08	32.661	432842	0.719886	0.0137469	0.00237823	7.45745e-09	0	rs34556183	0	0	rs142180737	6:28569838:28666203	ENSG00000232040	SCAND3
rs11773643	7	2104063	A	0.780459	-0.014587	0.00259854	1.98231e-08	31.5118	426601	0.780459	-0.014587	0.00259863	1.98461e-08	0	rs34731055	0	0	rs11763750	7:1814292:2282948	ENSG00000002822	MAD1L1
rs4730640	7	114343602	T	0.425447	0.0132935	0.00222938	2.4783e-09	35.5558	406253	0.380976	0.0132935	0.00222947	2.48215e-09	0	rs2079070	0	0	rs1229762	7:114036310:114695272	ENSG00000128573	FOXP2
rs13271129	8	14283489	A	0.708573	0.0139002	0.00237169	4.60386e-09	34.35	424923	0.708573	0.0139002	0.00237179	4.61024e-09	0	rs73219758	0	0	0	8:14088364:15288283	ENSG00000185053	SGCZ
rs10973282	9	37268221	C	0.839749	-0.0186145	0.00291392	1.67948e-10	40.8082	431946	0.839749	-0.0186145	0.00291406	1.68271e-10	0	rs10973207	0	0	0	9:37070169:37359649	ENSG00000147905	ZCCHC7
rs7089041	10	125003630	T	0.190855	0.0183515	0.00283845	1.01095e-10	41.8004	396678	0.17448	0.0183515	0.0028386	1.01317e-10	0	rs7915425	0	0	0	NA	NA	NA
rs10835396	11	28741185	T	0.44334	0.0125367	0.00217106	7.71916e-09	33.3444	424301	0.550747	0.0125367	0.00217114	7.72925e-09	0	rs1517572	0	0	rs1607227	NA	NA	NA
rs4592416	11	43800474	A	0.434394	-0.0124418	0.0021553	7.80407e-09	33.3235	432443	0.535497	-0.0124418	0.00215538	7.81407e-09	0	rs4592416	0	0	0	11:43630593:43858119	ENSG00000149084	HSD17B12
rs174560	11	61581764	T	0.685538	-0.0127319	0.00231446	3.77573e-08	30.2613	427413	0.685538	-0.0127319	0.00231454	3.77977e-08	0	rs174560	0	0	0	11:61512216:61638396	ENSG00000011347	SYT7
rs11224820	11	101402264	A	0.828667	0.0162701	0.00286564	1.3655e-08	32.2357	423330	0.828667	0.0162701	0.00286575	1.36717e-08	0	rs1939455	0	0	0	NA	NA	NA
rs1079727	11	113289182	T	0.842541	-0.0178371	0.00294063	1.31334e-09	36.7932	430231	0.842541	-0.0164856	0.00295118	2.32186e-08	0.0842415	rs7115462	0	0	0	11:113264529:113387452	ENSG00000149292	TTC12
rs7115226	11	113408518	C	0.927904	-0.0252305	0.00412719	9.76346e-10	37.3717	433128	0.927904	-0.0233578	0.004142	1.70794e-08	-0.000743201	rs1079727	0	0	0	11:113408095:113525279	ENSG00000149295	DRD2
rs3181261	11	118212671	C	0.920323	-0.0228165	0.00398398	1.02177e-08	32.7992	424069	0.920323	-0.022833	0.00398414	9.98584e-09	0.00188545	0	0	rs75458655	0	11:118192227:118275094	ENSG00000160593	SCN2B;JAML
rs3751046	11	122828342	A	0.854716	-0.0210589	0.00304248	4.46447e-12	47.9089	429373	0.854716	-0.0210637	0.00304265	4.42805e-12	0	rs3751046	0	0	0	11:122788431:122874143	ENSG00000109943	CRTAM
rs2664299	14	99742187	T	0.414513	0.0120268	0.00218443	3.67698e-08	30.3127	426203	0.579932	0.0120268	0.0021845	3.68093e-08	0	0	0	0	0	14:99687722:99943560	ENSG00000066629	EML1
rs8038326	15	47989799	A	0.728143	0.0150366	0.00241673	4.91189e-10	38.7118	426898	0.728143	0.0150366	0.00241684	4.9205e-10	0	rs8038326	0	0	rs17388803	NA	NA	NA
rs55708756	16	6563762	A	0.597527	-0.0132522	0.00220296	1.79178e-09	36.1878	422895	0.597527	-0.0132522	0.00220305	1.79456e-09	0	rs3095508	0	0	0	16:5189782:7714840	ENSG00000078328	RBFOX1
rs8047587	16	53798622	G	0.462227	0.015448	0.00217182	1.13631e-12	50.5937	420942	0.562185	0.0153922	0.00217197	1.37307e-12	0.00420243	rs9937053	0	rs17817288	0	16:53653963:54115967	ENSG00000140718	FTO
rs7186682	16	56096684	C	0.431412	0.0134233	0.00216681	5.82997e-10	38.3775	428556	0.555462	0.0133593	0.00216692	7.04294e-10	0	0	0	0	rs59779556	NA	NA	NA
rs205024	17	11227352	C	0.616519	-0.0133171	0.00221174	1.73268e-09	36.2536	426758	0.616519	-0.0133171	0.00221183	1.73534e-09	0	rs205024	0	0	rs205024	17:11191417:11565563	ENSG00000188803	SHISA6
rs9906181	17	21297686	A	0.329026	-0.0133832	0.0023795	1.86188e-08	31.6336	394854	0.304025	-0.0133832	0.00237959	1.86423e-08	0	rs536775486	0	0	0	17:21237370:21303266	ENSG00000274180	MAP2K3;NATD1
rs7210219	17	44018519	T	0.780629	0.0162195	0.00263084	7.04274e-10	38.009	416413	0.780629	0.0162195	0.00263096	7.05494e-10	0	rs7209792	0	rs112606247	0	17:44009688:44074260	ENSG00000091947	PYY;TMEM101
rs3794891	18	53055212	C	0.740495	0.0179654	0.00246774	3.33554e-13	52.9999	421750	0.740495	0.0179654	0.00246789	3.34665e-13	0	rs12607679	0	0	rs12963463	18:52290172:53537403	ENSG00000187323	DCC

[truncated: 26 more sheets: Supplementary Table 10, Supplementary Table 11, Supplementary Table 12, Supplementary Table 13, Supplementary Table 14, Supplementary Table 15, Supplementary Table 16, Supplementary Table 17, Supplementary Table 18, Supplementary Table 19, Supplementary Table 20, Supplementary Table 21, Supplementary Table 22, Supplementary Table 23, Supplementary Table 24, Supplementary Table 25, Supplementary Table 26, Supplementary Table 27, Supplementary Table 28, Supplementary Table 29 …]
